# Supplementary material for: Kinetics and mechanism of the racemic addition of trimethylsilyl cyanide to aldehydes catalysed by Lewis bases
Source: Royal Society of Chemistry journal article supplement (doi:10.1039/c2ob25188d), 2012-01-01

# Kinetics and mechanism of the racemic addition of trimethylsilyl cyanide to aldehydes catalysed by Lewis bases

## Supplementary Information

Michael North\* Marta Omedes-Pujol and Carl Young

School of Chemistry and University Research Centre in Catalysis and Intensified Processing,  
Bedson Building, University of Newcastle, Newcastle upon Tyne, UK, NE1 7RU.

### Contents

#### **Kinetic plots used to determine the overall reaction order**

|                                                                                                          |   |
|----------------------------------------------------------------------------------------------------------|---|
| Addition of trimethylsilyl cyanide to benzaldehyde catalysed by Et <sub>3</sub> N <b>1</b>               | 3 |
| Addition of trimethylsilyl cyanide to benzaldehyde catalysed by Bu <sub>4</sub> NNCS <b>2</b>            | 4 |
| Addition of trimethylsilyl cyanide to benzaldehyde catalysed by Bu <sub>4</sub> NN <sub>3</sub> <b>3</b> | 5 |
| Addition of trimethylsilyl cyanide to benzaldehyde catalysed by Bu <sub>4</sub> NCN <b>4</b>             | 6 |

#### **Kinetic plots used to determine the reaction order with respect to [PhCHO] and [Me<sub>3</sub>SiCN]**

|                                                                                                          |    |
|----------------------------------------------------------------------------------------------------------|----|
| Addition of trimethylsilyl cyanide to benzaldehyde catalysed by Et <sub>3</sub> N <b>1</b>               | 7  |
| Addition of trimethylsilyl cyanide to benzaldehyde catalysed by Bu <sub>4</sub> NNCS <b>2</b>            | 8  |
| Addition of trimethylsilyl cyanide to benzaldehyde catalysed by Bu <sub>4</sub> NN <sub>3</sub> <b>3</b> | 9  |
| Addition of trimethylsilyl cyanide to benzaldehyde catalysed by Bu <sub>4</sub> NCN <b>4</b>             | 10 |

#### **Kinetic plots used to determine the reaction order with respect to catalyst concentration**

|                                                                                                          |    |
|----------------------------------------------------------------------------------------------------------|----|
| Addition of trimethylsilyl cyanide to benzaldehyde catalysed by Et <sub>3</sub> N <b>1</b>               | 11 |
| Addition of trimethylsilyl cyanide to benzaldehyde catalysed by Bu <sub>4</sub> NNCS <b>2</b>            | 13 |
| Addition of trimethylsilyl cyanide to benzaldehyde catalysed by Bu <sub>4</sub> NN <sub>3</sub> <b>3</b> | 15 |
| Addition of trimethylsilyl cyanide to benzaldehyde catalysed by Bu <sub>4</sub> NCN <b>4</b>             | 17 |

#### **Kinetic plots used to construct the Hammett plots**

|                                                                                                                                  |    |
|----------------------------------------------------------------------------------------------------------------------------------|----|
| Addition of trimethylsilyl cyanide to benzaldehydes catalysed by Et <sub>3</sub> N <b>1</b>                                      | 19 |
| Hammett plot for the reaction catalysed by Et <sub>3</sub> N <b>1</b>                                                            | 22 |
| Addition of trimethylsilyl cyanide to benzaldehydes catalysed by Bu <sub>4</sub> NNCS <b>2</b>                                   | 23 |
| Hammett plot for the reaction catalysed by Bu <sub>4</sub> NNCS <b>2</b>                                                         | 26 |
| Addition of trimethylsilyl cyanide to benzaldehydes catalysed by Bu <sub>4</sub> NN <sub>3</sub> <b>3</b>                        | 27 |
| Hammett plot for the reaction catalysed by Bu <sub>4</sub> NN <sub>3</sub> <b>3</b>                                              | 29 |
| Addition of trimethylsilyl cyanide to benzaldehydes catalysed by Bu <sub>4</sub> NCN <b>4</b>                                    | 30 |
| Hammett plot for the reaction catalysed by Bu <sub>4</sub> NCN <b>4</b>                                                          | 32 |
| Addition of trimethylsilyl cyanide to benzaldehydes catalysed by Bu <sub>4</sub> NNCS <b>2</b> in a stopped flow kinetics system | 33 |
| Tabulated rate data for the Hammett plot in a stopped flow kinetics system                                                       | 35 |
| Hammett plot obtained using the stopped flow kinetics system                                                                     | 35 |

#### **Kinetic plots used to construct the Eyring plots**

|                                                                                                                      |    |
|----------------------------------------------------------------------------------------------------------------------|----|
| Error analysis                                                                                                       | 36 |
| Addition of trimethylsilyl cyanide to benzaldehyde catalysed by Et <sub>3</sub> N <b>1</b> (2 mol%)                  | 38 |
| Addition of trimethylsilyl cyanide to benzaldehyde catalysed by Bu <sub>4</sub> NNCS <b>2</b> (1 mol%)               | 40 |
| Addition of trimethylsilyl cyanide to benzaldehyde catalysed by Bu <sub>4</sub> NN <sub>3</sub> <b>3</b> (0.05 mol%) | 43 |
| Addition of trimethylsilyl cyanide to benzaldehyde catalysed by Bu <sub>4</sub> NCN <b>4</b> (0.005 mol%)            | 46 |

### **NMR stacked plots to investigate the formation of hypervalent silicon species**

|                                                                                |    |
|--------------------------------------------------------------------------------|----|
| Addition of Et <sub>3</sub> N <b>1</b> to trimethylsilyl cyanide               | 49 |
| Addition of Bu <sub>4</sub> NNCS <b>2</b> to trimethylsilyl cyanide            | 51 |
| Addition of Bu <sub>4</sub> NN <sub>3</sub> <b>3</b> to trimethylsilyl cyanide | 53 |
| Addition of Bu <sub>4</sub> NCN <b>4</b> to trimethylsilyl cyanide             | 55 |

### **Kinetic plots used to determine the influence of water**

|                                                                                                                                                      |    |
|------------------------------------------------------------------------------------------------------------------------------------------------------|----|
| Addition of trimethylsilyl cyanide to 3,4-dimethylbenzaldehyde catalysed by Bu <sub>4</sub> NN <sub>3</sub> <b>3</b>                                 | 57 |
| Plots showing that in the presence of water, the reaction is still first order in Et <sub>3</sub> N concentration                                    | 58 |
| Addition of trimethylsilyl cyanide to benzaldehydes catalysed by Et <sub>3</sub> N <b>1</b> in the presence of water                                 | 60 |
| Hammett plot for the Et <sub>3</sub> N catalysed reaction in the presence of water                                                                   | 62 |
| Variable temperature kinetic study of the addition of trimethylsilyl cyanide to benzaldehyde catalysed by Et <sub>3</sub> N in the presence of water | 63 |

### **<sup>1</sup>H NMR spectra of cyanohydrin trimethylsilyl ethers**

|                                                                |    |
|----------------------------------------------------------------|----|
| 2-Trimethylsilyloxy-phenylacetonitrile                         | 65 |
| 2-Trimethylsilyloxy-(3,5-difluorophenyl)acetonitrile           | 66 |
| 2-Trimethylsilyloxy-(3,4-dichlorophenyl)acetonitrile           | 67 |
| 2-Trimethylsilyloxy-(4-trifluoromethylphenyl)acetonitrile      | 68 |
| 2-Trimethylsilyloxy-(3-chlorophenyl)acetonitrile               | 69 |
| 2-Trimethylsilyloxy-(3-fluorophenyl)acetonitrile               | 70 |
| 2-Trimethylsilyloxy-(4-chlorophenyl)acetonitrile               | 71 |
| 2-Trimethylsilyloxy-(4-bromophenyl)acetonitrile                | 72 |
| 2-Trimethylsilyloxy-(4-fluorophenyl)acetonitrile               | 73 |
| 2-Trimethylsilyloxy-(4-thiomethylphenyl)acetonitrile           | 74 |
| 2-Trimethylsilyloxy-(3-methylphenyl)acetonitrile               | 75 |
| 2-Trimethylsilyloxy-(4-methylphenyl)acetonitrile               | 76 |
| 2-Trimethylsilyloxy-(3,4-dimethylphenyl)acetonitrile           | 77 |
| 2-Trimethylsilyloxy-(4-methoxyphenyl)acetonitrile              | 78 |
| 2-Trimethylsilyloxy-(4- <i>tert</i> -butoxyphenyl)acetonitrile | 79 |

## Kinetic plots used to determine the overall reaction order

### Addition of trimethylsilyl cyanide to benzaldehyde catalysed by Et<sub>3</sub>N 1

#### Zero order kinetics plot

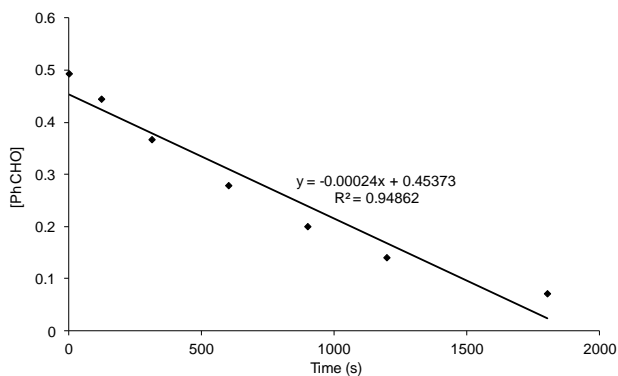

#### First order in [PhCHO] kinetics plot

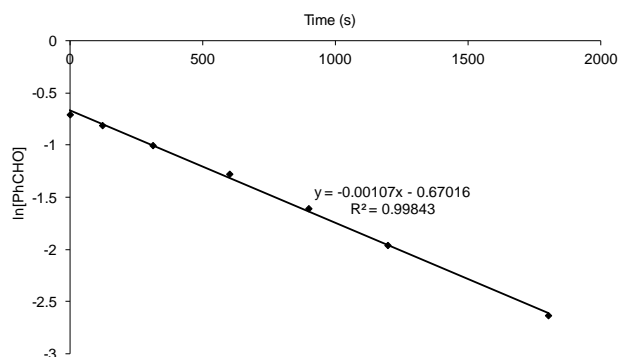

#### First order in [Me<sub>3</sub>SiCN] kinetics plot

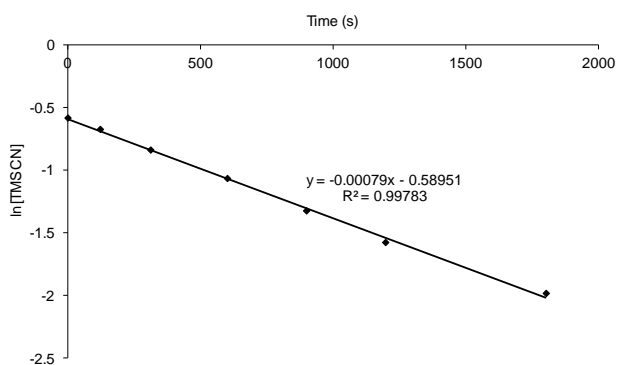

#### Second order kinetics plot

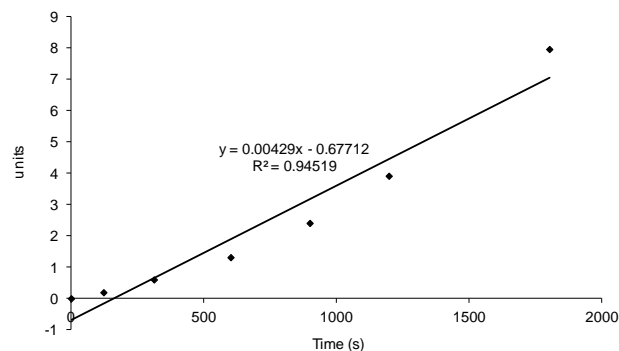

For the second order plot, the units for the vertical scale are:  $\ln[(B_0A_t)/(B_tA_0)]/(A_0-B_0)$  where: A = [PhCHO], B = [Me<sub>3</sub>SiCN] and the subscripts 0 and t refer to initial concentrations and concentrations at time t, respectively. In all cases the concentration of benzaldehyde was monitored.

## Addition of trimethylsilyl cyanide to benzaldehyde catalysed by Bu<sub>4</sub>NNCS 2

Zero order kinetics plot

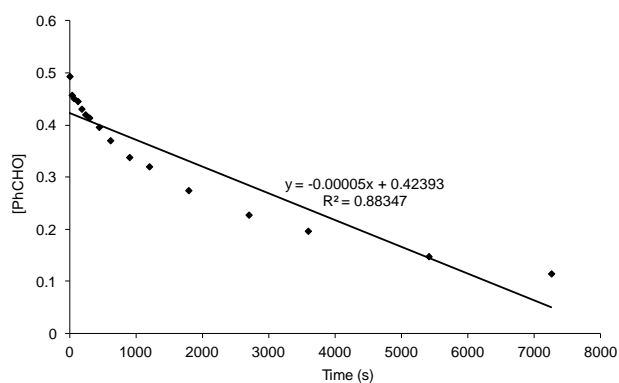

First order in [PhCHO] kinetics plot

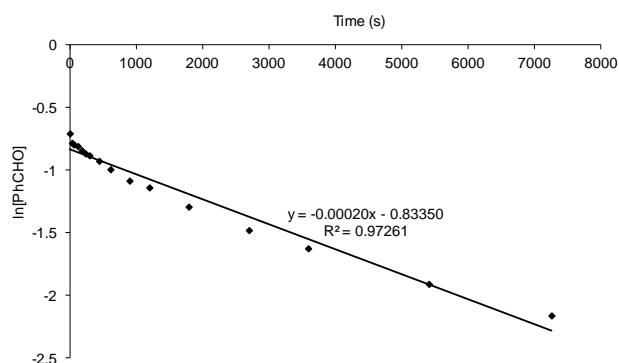

First order in [Me<sub>3</sub>SiCN] kinetics plot

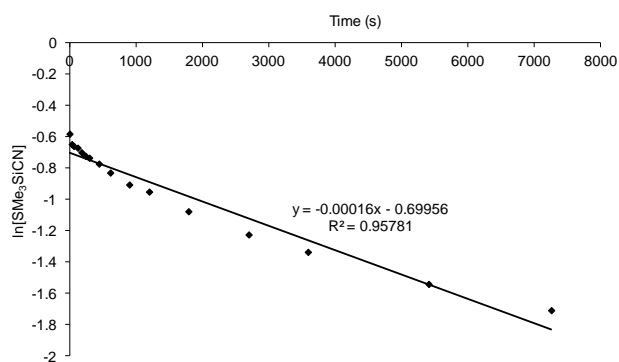

Second order kinetics plot

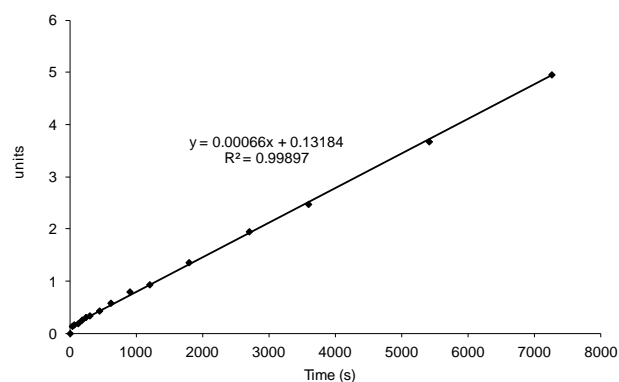

For the second order plot, the units for the vertical scale are:  $\ln[(B_0A_t)/(B_tA_0)]/(A_0-B_0)$  where: A = [PhCHO], B = [Me<sub>3</sub>SiCN] and the subscripts 0 and t refer to initial concentrations and concentrations at time t, respectively. In all cases the concentration of benzaldehyde was monitored.

## Addition of trimethylsilyl cyanide to benzaldehyde catalysed by $\text{Bu}_4\text{NN}_3$ 3

### Zero order kinetics plot

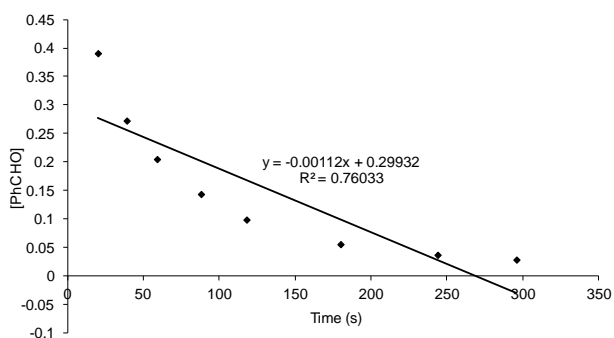

### First order in $[\text{PhCHO}]$ kinetics plot

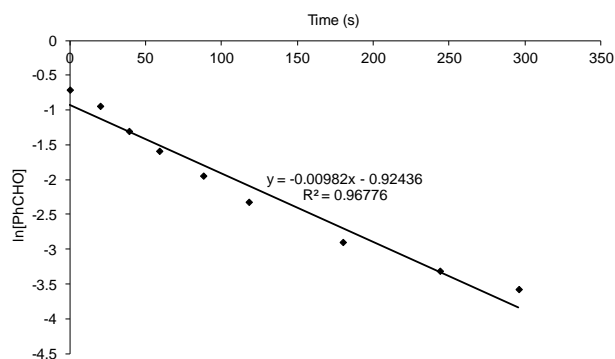

### First order in $[\text{Me}_3\text{SiCN}]$ kinetics plot

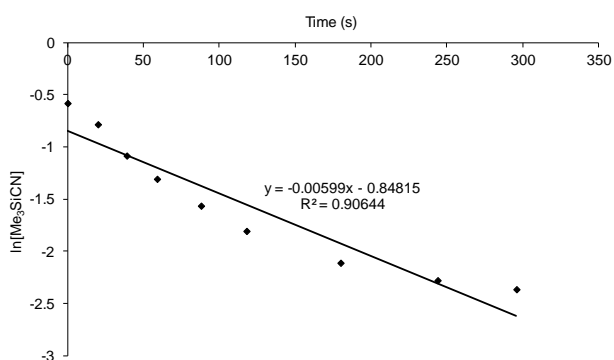

### Second order kinetics plot

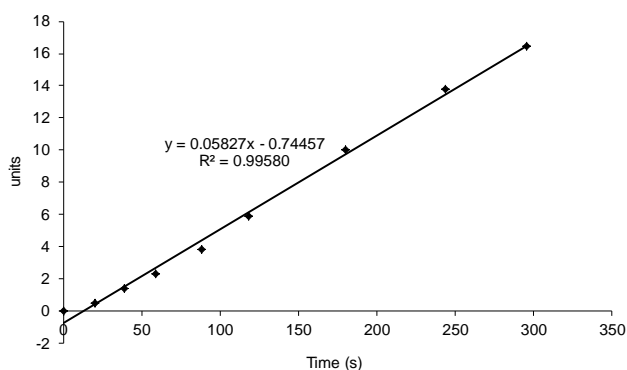

For the second order plot, the units for the vertical scale are:  $\ln[(B_0A_t)/(B_tA_0)]/(A_0 - B_0)$  where:  $A = [\text{PhCHO}]$ ,  $B = [\text{Me}_3\text{SiCN}]$  and the subscripts 0 and t refer to initial concentrations and concentrations at time t, respectively. In all cases the concentration of benzaldehyde was monitored.

## Addition of trimethylsilyl cyanide to benzaldehyde catalysed by Bu<sub>4</sub>NCN 3

Zero order kinetics plot

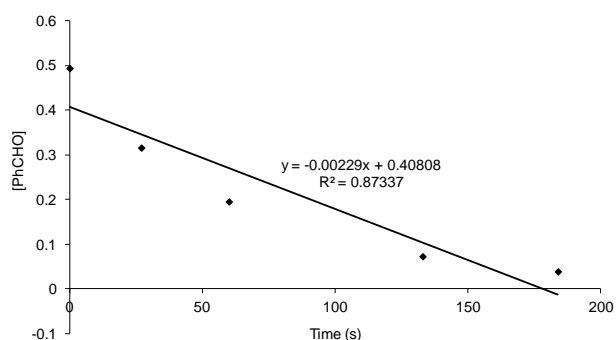

First order in  $[\text{PhCHO}]$  kinetics plot

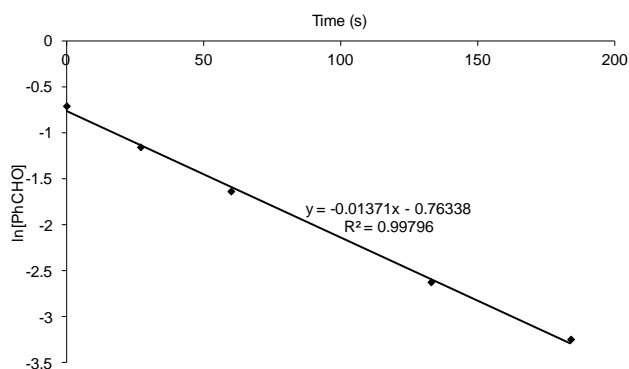

First order in  $[\text{Me}_3\text{SiCN}]$  kinetics plot

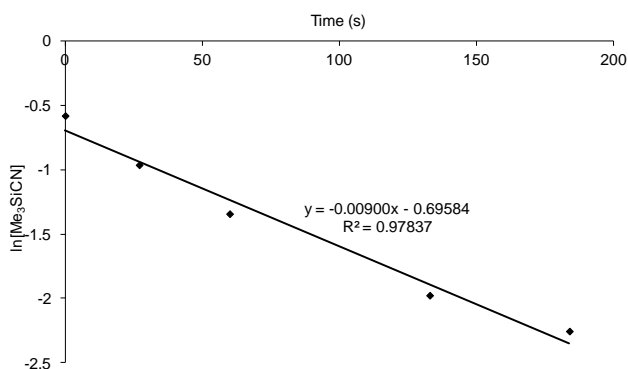

Second order kinetics plot

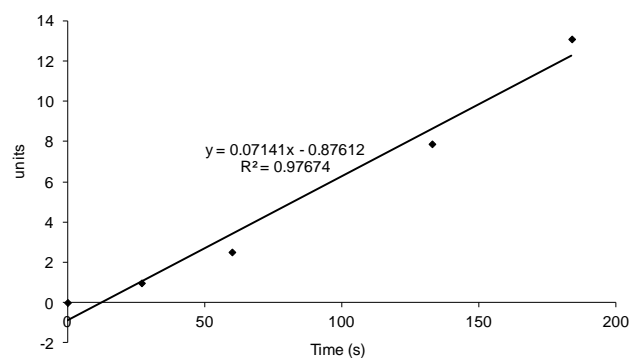

For the second order plot, the units for the vertical scale are:  $\ln[(B_0A_t)/(B_tA_0)]/(A_0-B_0)$  where:  $A = [\text{PhCHO}]$ ,  $B = [\text{Me}_3\text{SiCN}]$  and the subscripts 0 and t refer to initial concentrations and concentrations at time t, respectively. In all cases the concentration of benzaldehyde was monitored.

## Kinetic plots used to determine the reaction order with respect to [PhCHO] and [Me<sub>3</sub>SiCN]

### Addition of trimethylsilyl cyanide to benzaldehyde catalysed by Et<sub>3</sub>N 1

Kinetic plot showing that the initial rate of reaction does not depend on the initial concentration of Me<sub>3</sub>SiCN

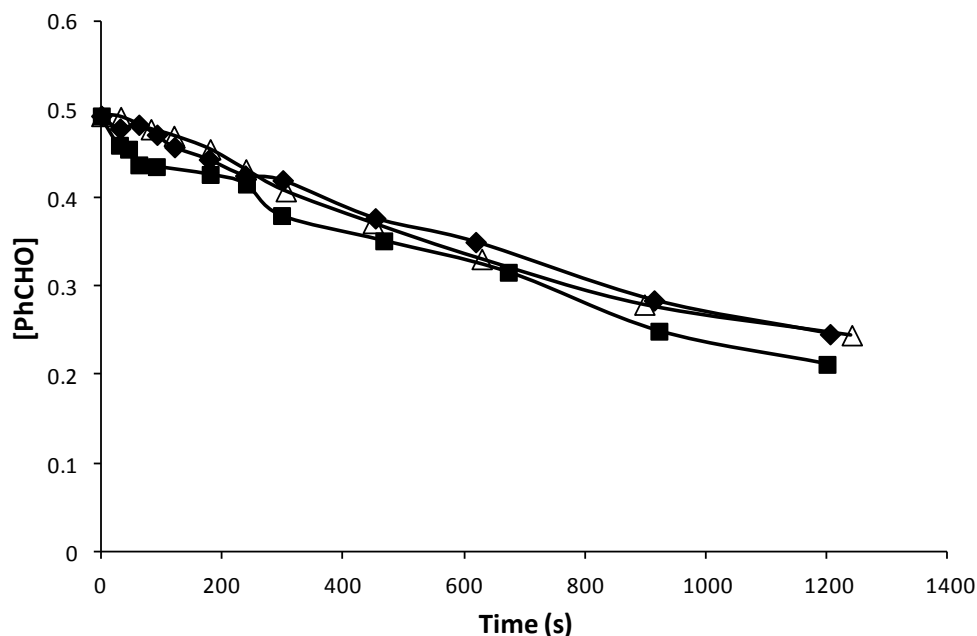

Open triangles [Me<sub>3</sub>SiCN]<sub>0</sub> = 0.28 M, filled diamonds [Me<sub>3</sub>SiCN]<sub>0</sub> = 0.56 M, filled squares [Me<sub>3</sub>SiCN]<sub>0</sub> = 1.12 M. In each case [PhCHO]<sub>0</sub> = 0.53 M and [Et<sub>3</sub>N] = 0.01 M.

Kinetic plot showing that the initial rate of reaction does depend on the initial concentration of PhCHO

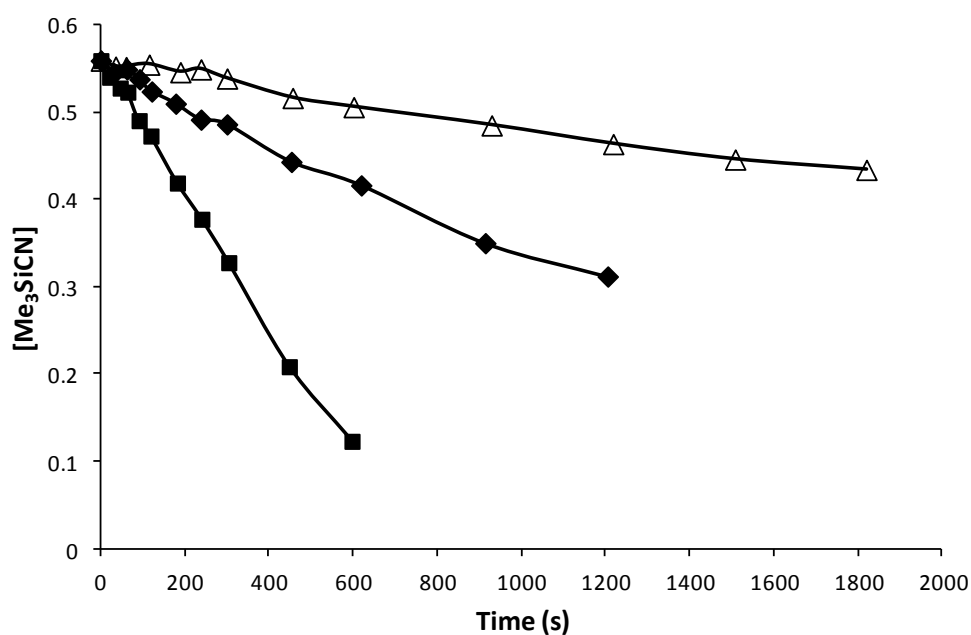

Open triangles [PhCHO]<sub>0</sub> = 0.25 M, filled diamonds [PhCHO]<sub>0</sub> = 0.49 M, filled squares [PhCHO]<sub>0</sub> = 0.99 M. In each case [Me<sub>3</sub>SiCN]<sub>0</sub> = 0.56 M and [Et<sub>3</sub>N] = 0.01 M.

## Addition of trimethylsilyl cyanide to benzaldehyde catalysed by Bu<sub>4</sub>NNCS 2

Kinetic plot showing that the initial rate of reaction does depend on the initial concentration of Me<sub>3</sub>SiCN

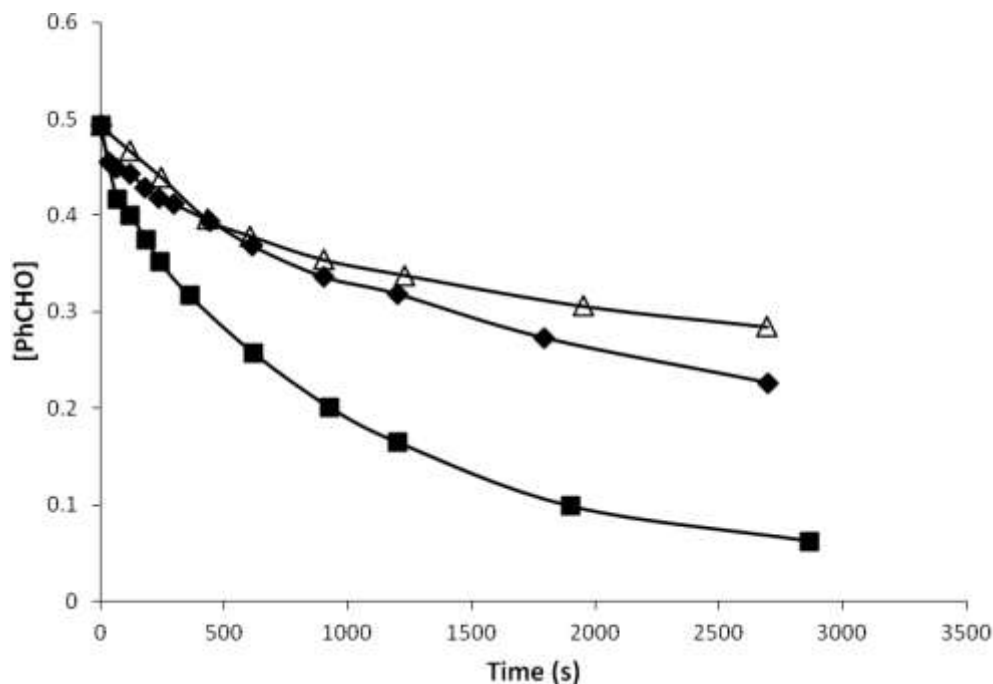

Open triangles [Me<sub>3</sub>SiCN]<sub>0</sub> = 0.28 M, filled diamonds [Me<sub>3</sub>SiCN]<sub>0</sub> = 0.56 M, filled squares [Me<sub>3</sub>SiCN]<sub>0</sub> = 1.12 M. In each case [PhCHO]<sub>0</sub> = 0.53 M and [Bu<sub>4</sub>NNCS] = 9.4×10<sup>-3</sup> M.

Kinetic plot showing that the initial rate of reaction does depend on the initial concentration of PhCHO

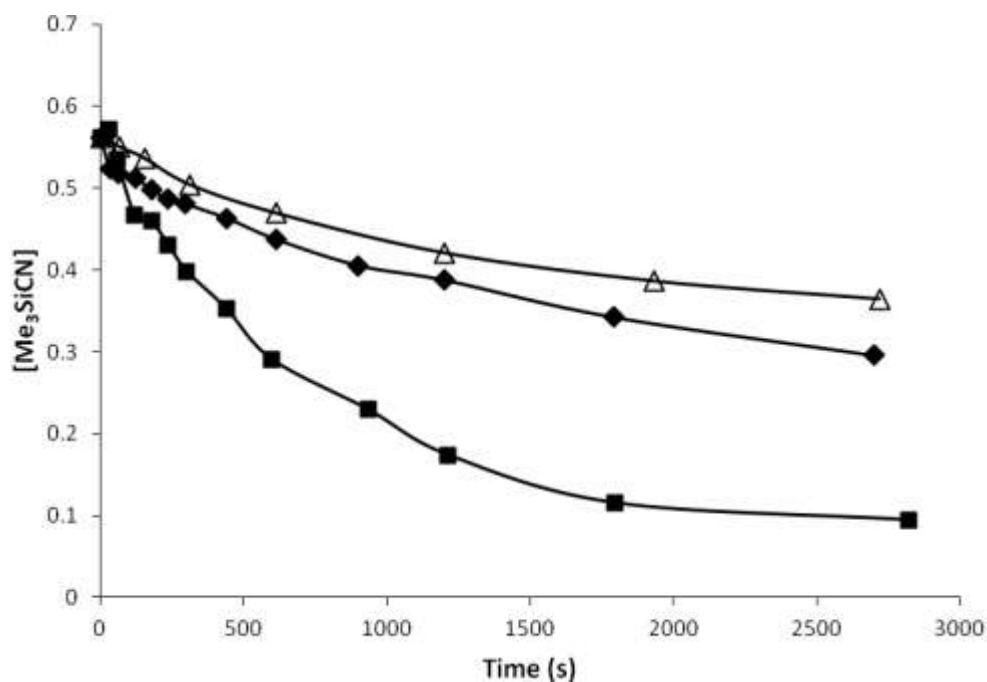

Open triangles [PhCHO]<sub>0</sub> = 0.27 M, filled diamonds [PhCHO]<sub>0</sub> = 0.53 M, filled squares [PhCHO]<sub>0</sub> = 1.06 M. In each case [Me<sub>3</sub>SiCN]<sub>0</sub> = 0.56 M and [Bu<sub>4</sub>NNCS] = 9.4×10<sup>-3</sup> M.



### Addition of trimethylsilyl cyanide to benzaldehyde catalysed by $\text{Bu}_4\text{NN}_3$ 3

Kinetic plot showing that the initial rate of reaction does depend on the initial concentration of  $\text{Me}_3\text{SiCN}$

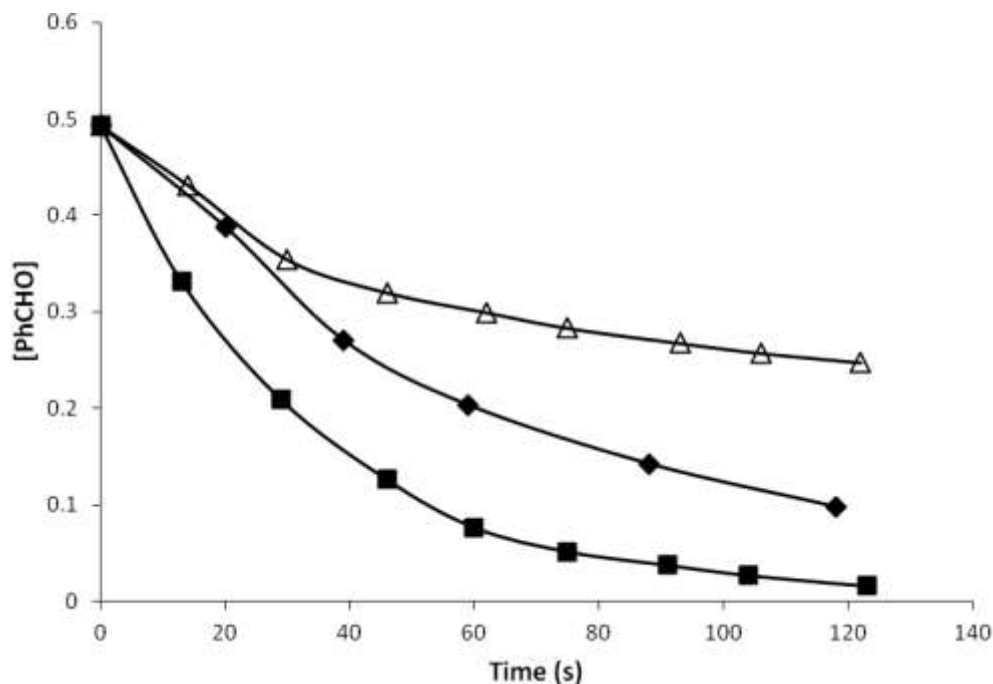

Open triangles  $[\text{Me}_3\text{SiCN}]_0 = 0.28 \text{ M}$ , filled diamonds  $[\text{Me}_3\text{SiCN}]_0 = 0.56 \text{ M}$ , filled squares  $[\text{Me}_3\text{SiCN}]_0 = 1.12 \text{ M}$ . In each case  $[\text{PhCHO}]_0 = 0.53 \text{ M}$  and  $[\text{Bu}_4\text{NN}_3] = 2.3 \times 10^{-3} \text{ M}$ .

Kinetic plot showing that the initial rate of reaction does depend on the initial concentration of  $\text{PhCHO}$

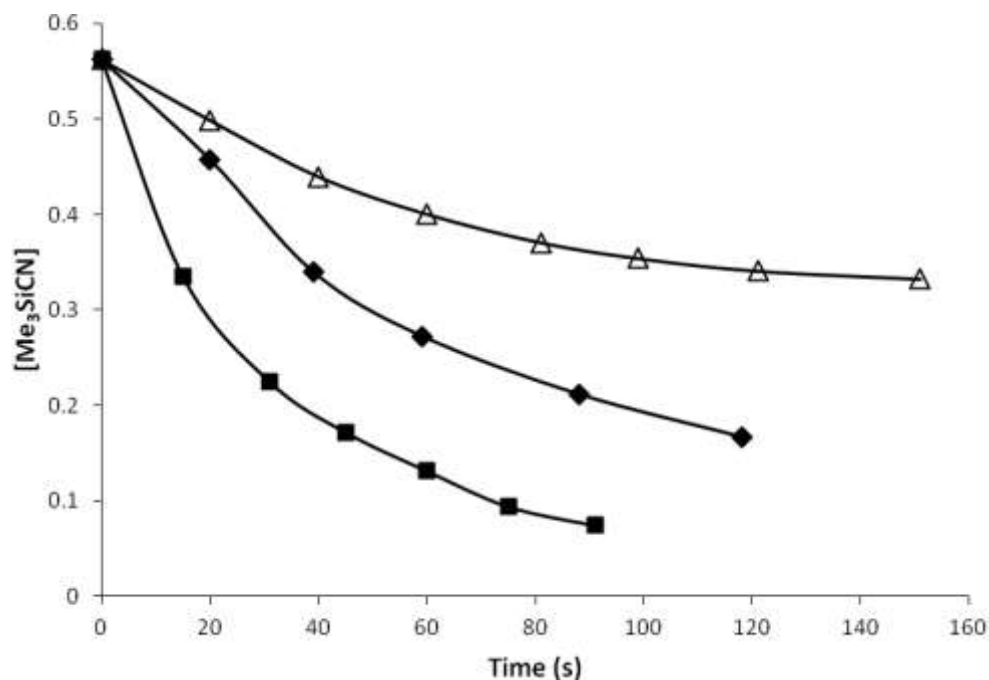

Open triangles  $[\text{PhCHO}]_0 = 0.27 \text{ M}$ , filled diamonds  $[\text{PhCHO}]_0 = 0.53 \text{ M}$ , filled squares  $[\text{PhCHO}]_0 = 1.06 \text{ M}$ . In each case  $[\text{Me}_3\text{SiCN}]_0 = 0.56 \text{ M}$  and  $[\text{Bu}_4\text{NN}_3] = 2.3 \times 10^{-3} \text{ M}$ .

## Addition of trimethylsilyl cyanide to benzaldehyde catalysed by Bu<sub>4</sub>NCN 4

Kinetic plot showing that the initial rate of reaction does not depend on the initial concentration of Me<sub>3</sub>SiCN

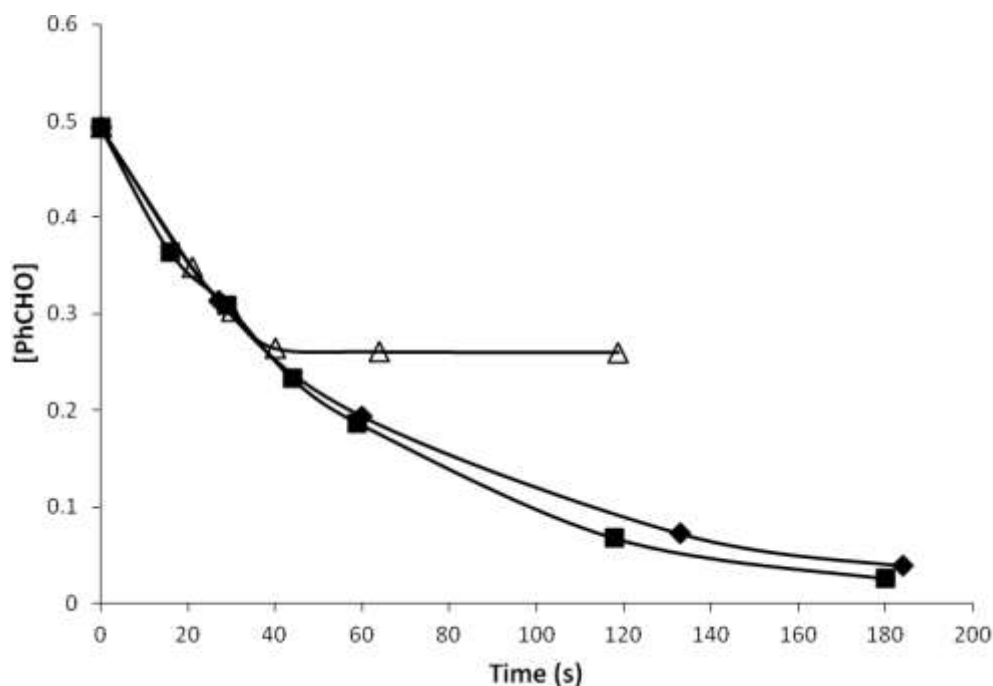

Open triangles [Me<sub>3</sub>SiCN]<sub>0</sub> = 0.28 M, filled diamonds [Me<sub>3</sub>SiCN]<sub>0</sub> = 0.56 M, filled squares [Me<sub>3</sub>SiCN]<sub>0</sub> = 1.12 M. In each case [PhCHO]<sub>0</sub> = 0.53 M and [Bu<sub>4</sub>NCN] = 2.3 × 10<sup>-3</sup> M.

Kinetic plot showing that the initial rate of reaction does depend on the initial concentration of PhCHO

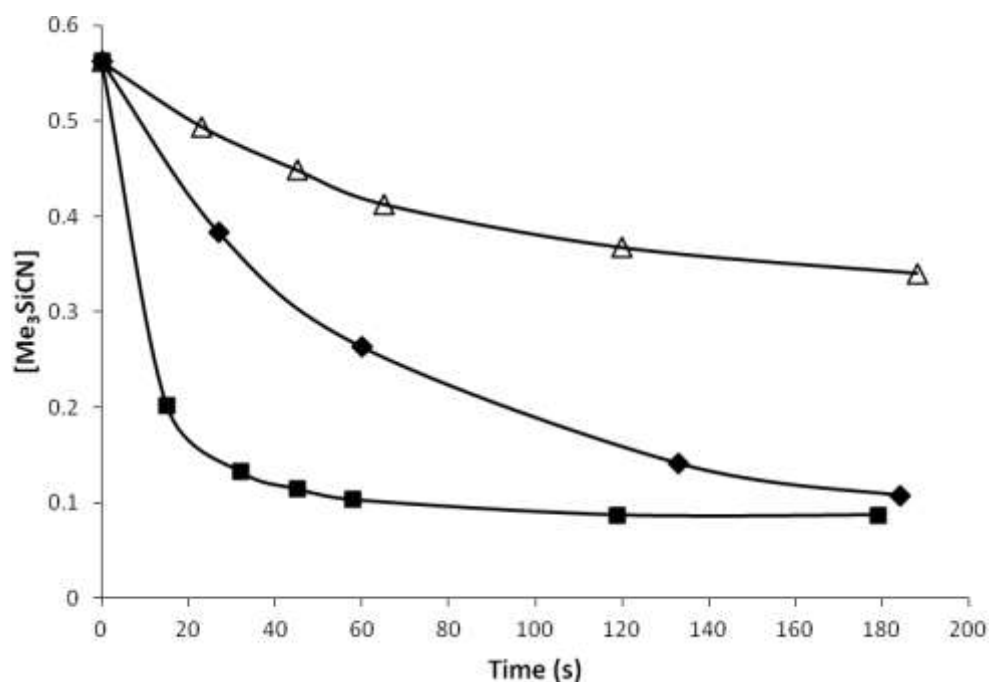

Open triangles [PhCHO]<sub>0</sub> = 0.27 M, filled diamonds [PhCHO]<sub>0</sub> = 0.53 M, filled squares [PhCHO]<sub>0</sub> = 1.06 M. In each case [Me<sub>3</sub>SiCN]<sub>0</sub> = 0.56 M and [Bu<sub>4</sub>NCN] = 2.3 × 10<sup>-3</sup> M.

## Kinetic plots used to determine the reaction order with respect to catalyst concentration

### Addition of trimethylsilyl cyanide to benzaldehyde catalysed by Et<sub>3</sub>N 1

[Et<sub>3</sub>N] = 0.001 M (corresponds to 0.2 mol%)

*Run 1*

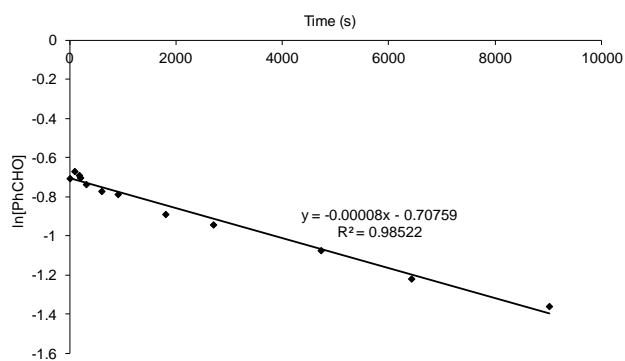

*Run 2*

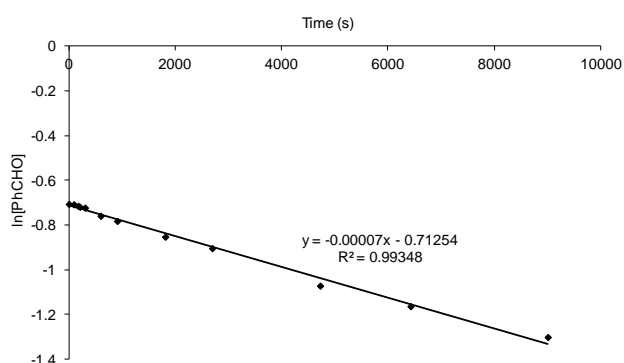

[Et<sub>3</sub>N] = 0.002 M (corresponds to 0.4 mol%)

*Run 1*

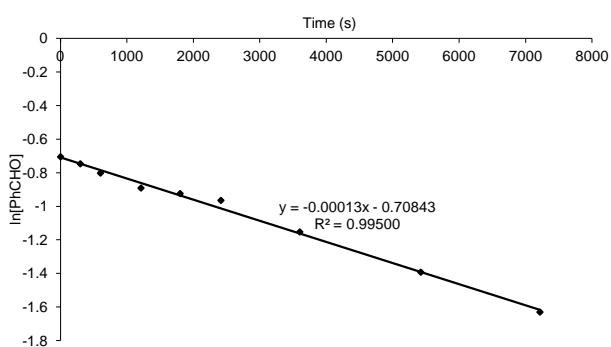

*Run 2*

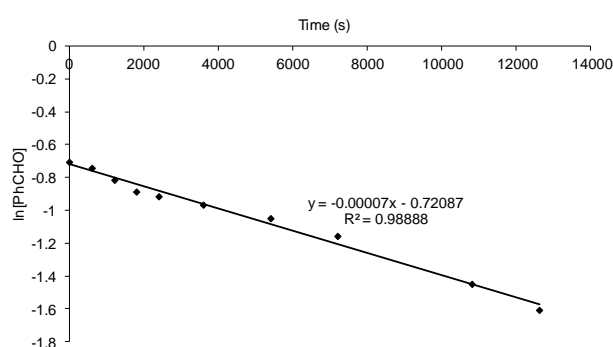

[Et<sub>3</sub>N] = 0.004 M (corresponds to 0.8 mol%)

*Run 1*

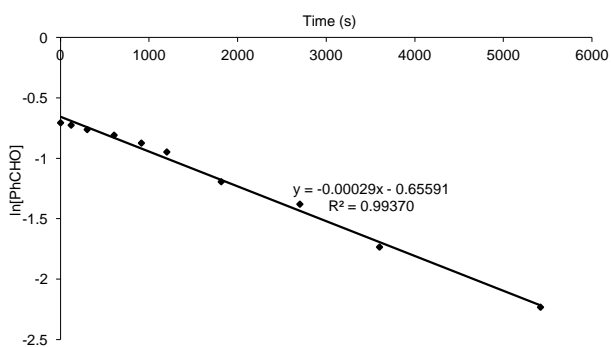

*Run 2*

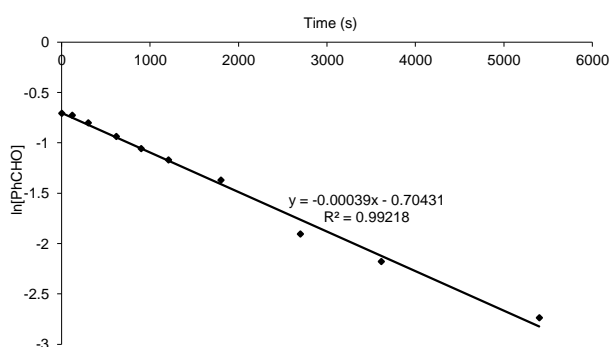

$[\text{Et}_3\text{N}] = 0.01 \text{ M}$  (corresponds to 2 mol%)

Run 1

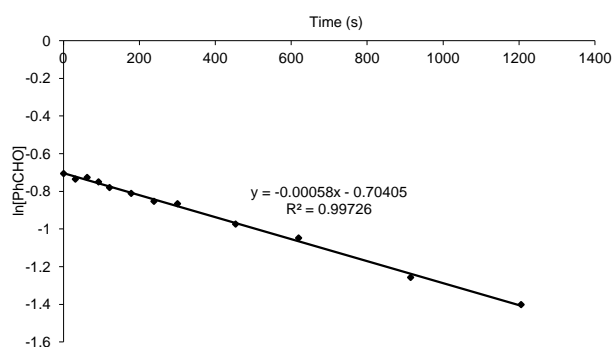

Run 2

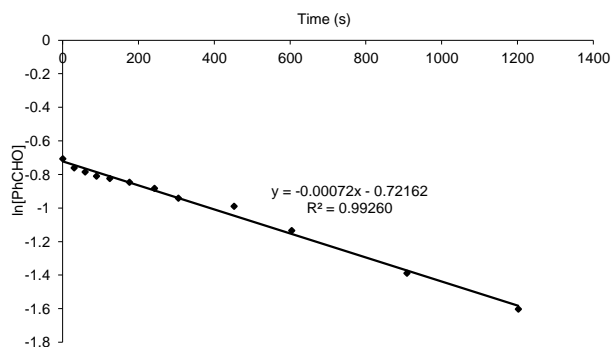

$[\text{Et}_3\text{N}] = 0.02 \text{ M}$  (corresponds to 4 mol%)

Run 1

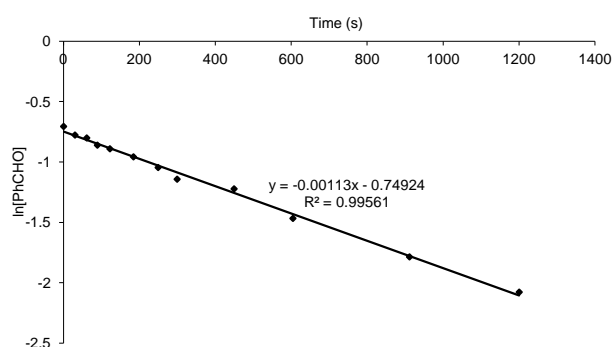

Run 2

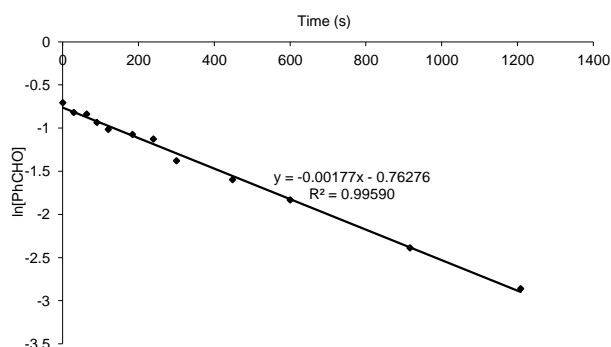

Plot of  $k_{\text{obs}}$  against  $[\mathbf{1}]$

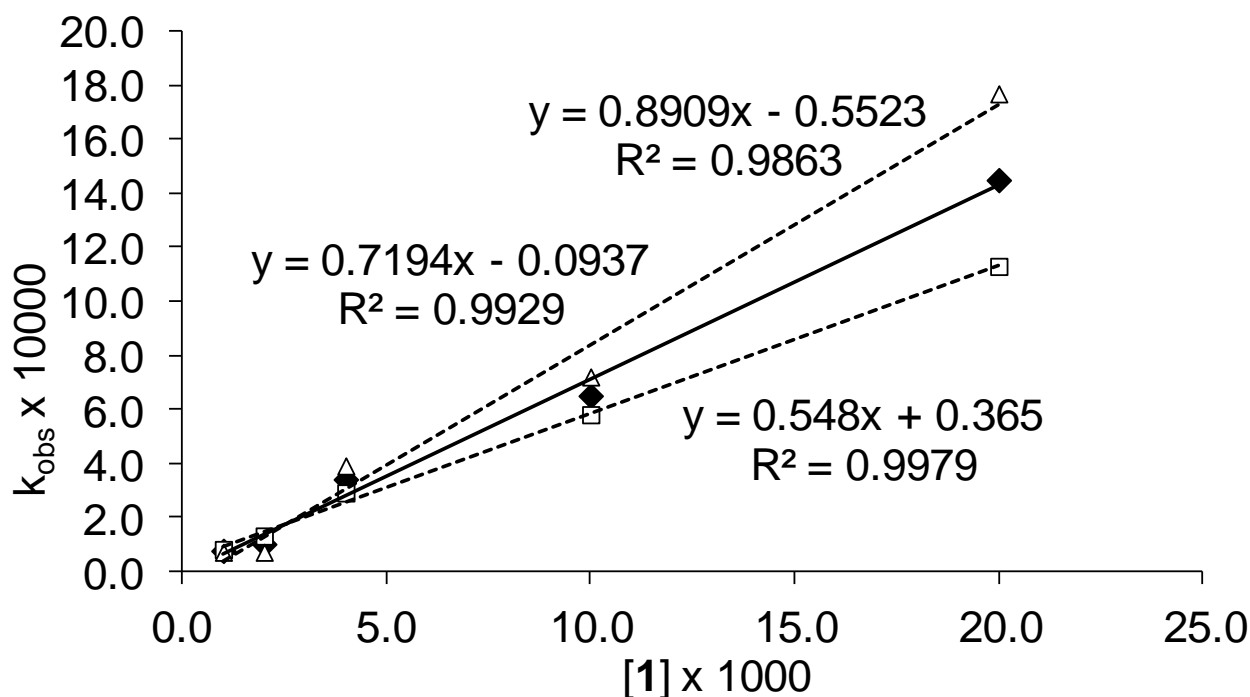

The dotted lines and empty data points show the rate data obtained from each of a duplicated series of kinetic experiments. The solid line and filled data points show the average of these two data sets and correspond to the data given in Figure 1 of the manuscript. The error in the rate constant was estimated from the difference in slopes of the three lines in this plot.

## Addition of trimethylsilyl cyanide to benzaldehyde catalysed by Bu<sub>4</sub>NNCS 2

$[Bu_4NNCS] = 2.5 \times 10^{-4}$  M (corresponds to 0.05 mol%)

Run 1

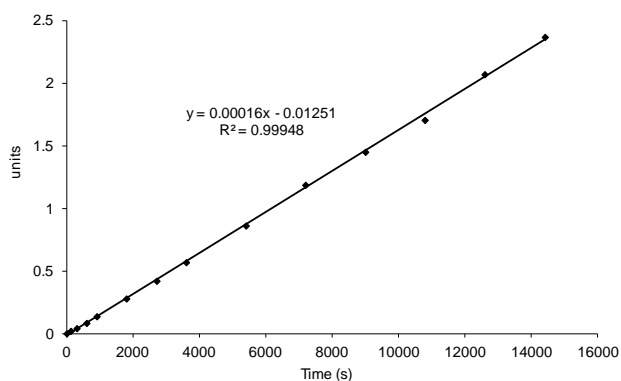

Run 2

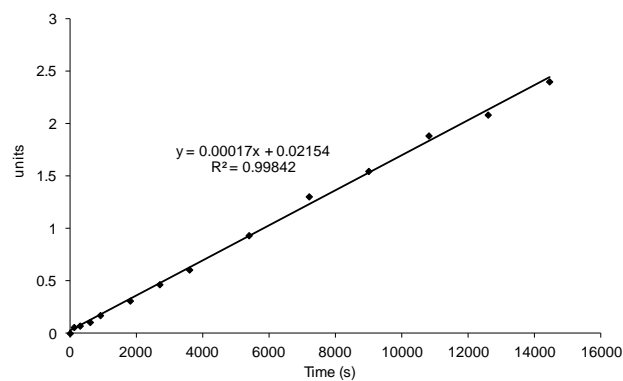

$[Bu_4NNCS] = 5 \times 10^{-4}$  M (corresponds to 0.1 mol%)

Run 1

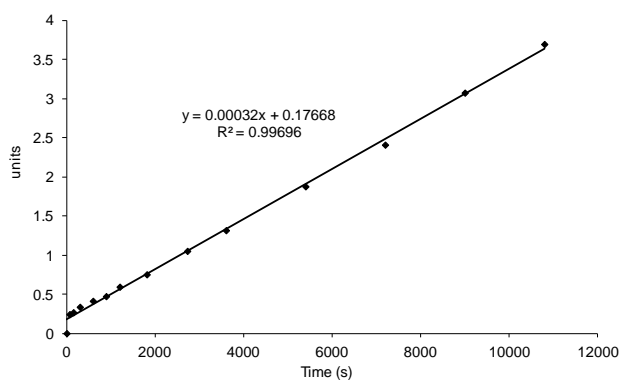

Run 2

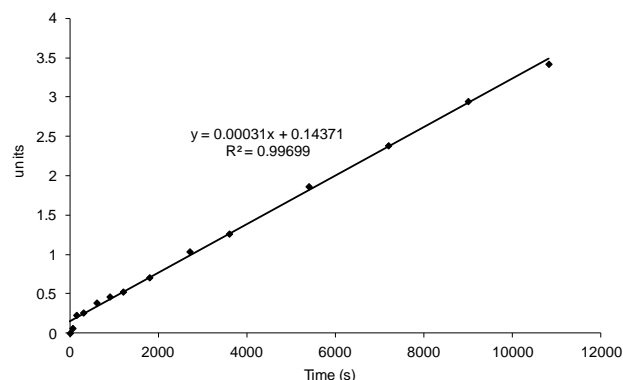

$[Bu_4NNCS] = 0.001$  M (corresponds to 0.2 mol%)

Run 1

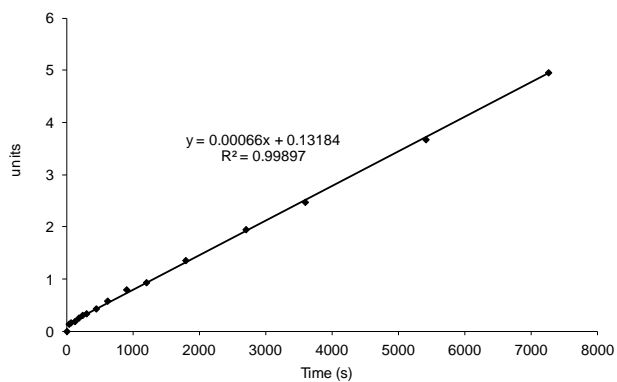

Run 2

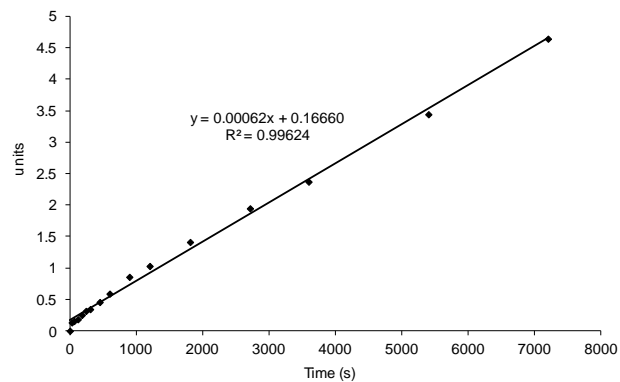

$[\text{Bu}_4\text{NNCS}] = 0.002 \text{ M}$  (corresponds to 0.4 mol%)

Run 1

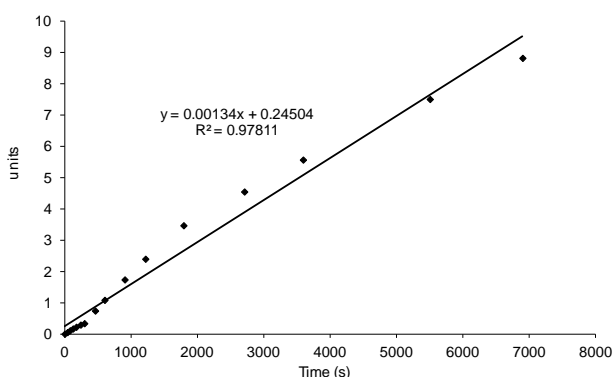

Run 2

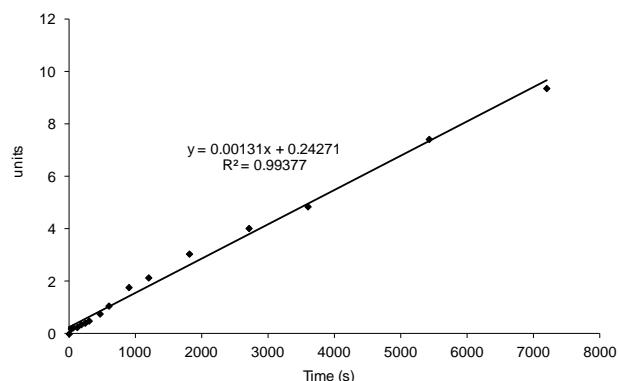

The units for the vertical scale are:  $\ln[(B_0A_t)/(B_tA_0)]/(A_0 - B_0)$  where:  $A = [\text{PhCHO}]$ ,  $B = [\text{Me}_3\text{SiCN}]$  and the subscripts 0 and t refer to initial concentrations and concentrations at time t, respectively. The concentration of benzaldehyde was monitored.

Plot of  $k_{\text{obs}}$  against [2]

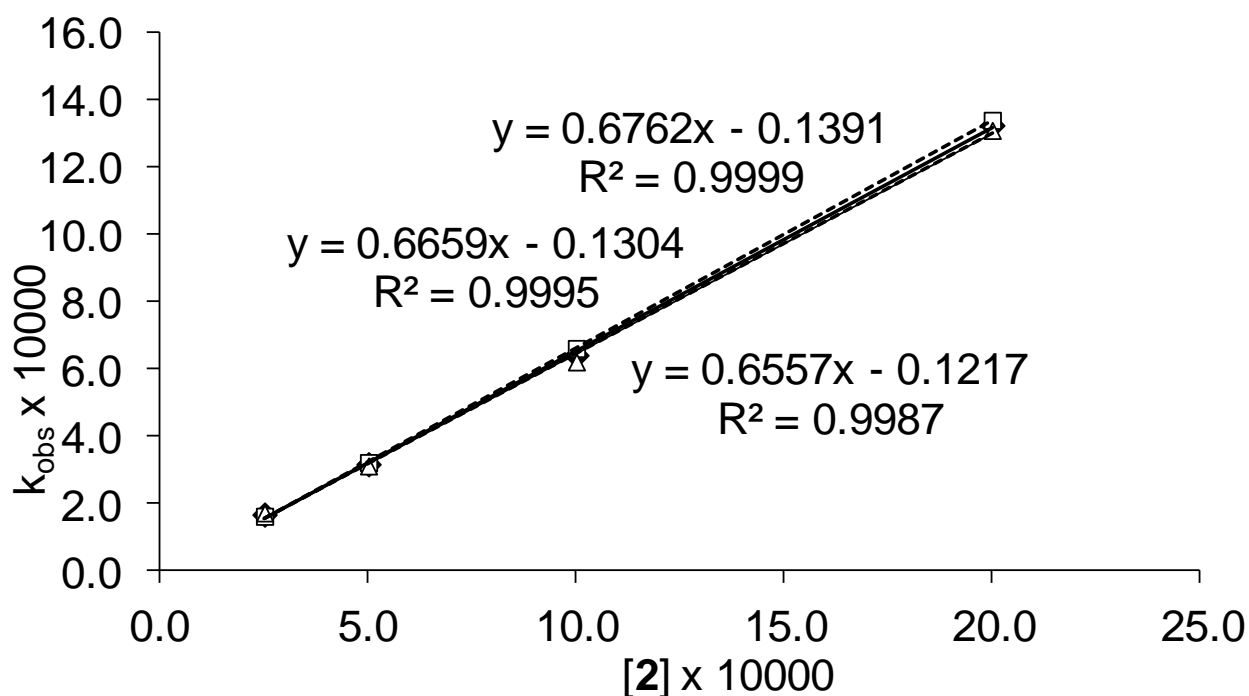

The dotted lines and empty data points show the rate data obtained from each of a duplicated series of kinetic experiments. The solid line and filled data points show the average of these two data sets and correspond to the data given in Figure 1 of the manuscript. The error in the rate constant was estimated from the difference in slopes of the three lines in this plot.

## Addition of trimethylsilyl cyanide to benzaldehyde catalysed by Bu<sub>4</sub>NN<sub>3</sub> 3

[Bu<sub>4</sub>NN<sub>3</sub>] = 5 × 10<sup>-5</sup> M (corresponds to 0.01 mol%)

*Run 1*

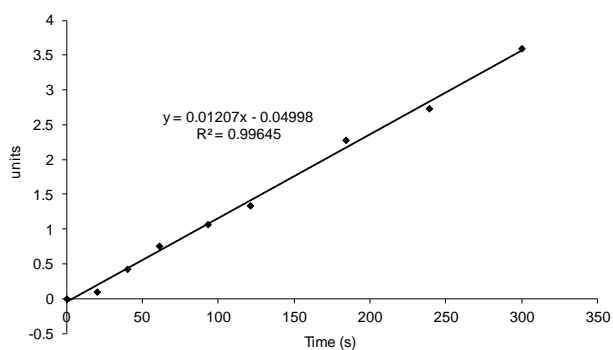

*Run 2*

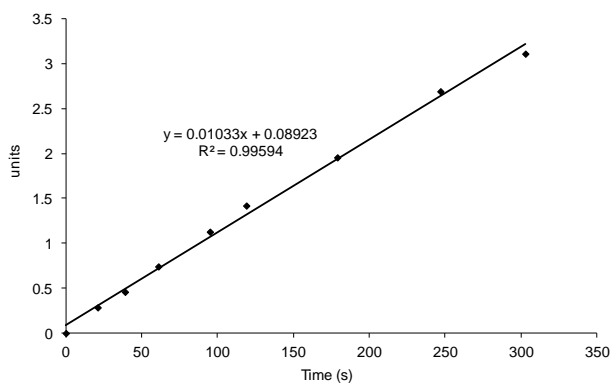

[Bu<sub>4</sub>NN<sub>3</sub>] = 1 × 10<sup>-4</sup> M (corresponds to 0.02 mol%)

*Run 1*

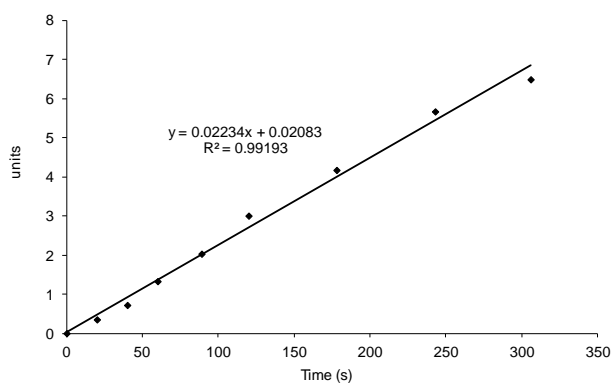

*Run 2*

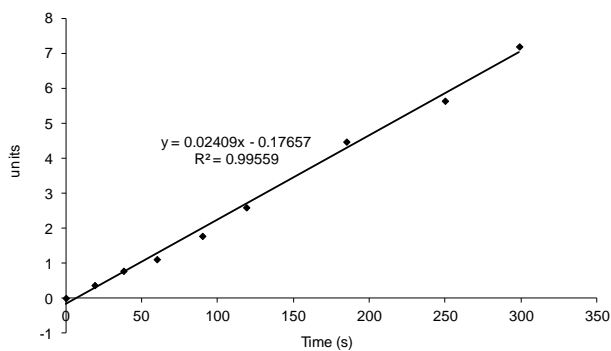

[Bu<sub>4</sub>NN<sub>3</sub>] = 3 × 10<sup>-4</sup> M (corresponds to 0.05 mol%)

*Run 1*

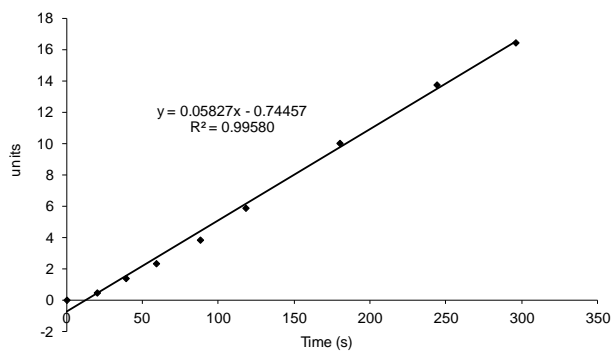

*Run 2*

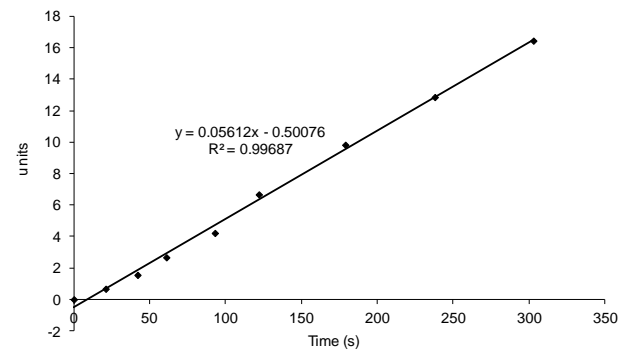

$[\text{Bu}_4\text{NN}_3] = 4 \times 10^{-4} \text{ M}$  (corresponds to 0.07 mol%)

Run 1

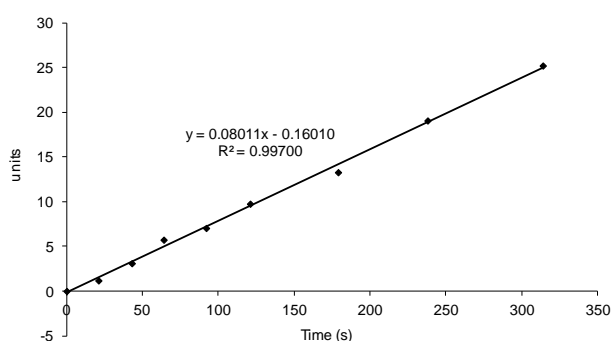

Run 2

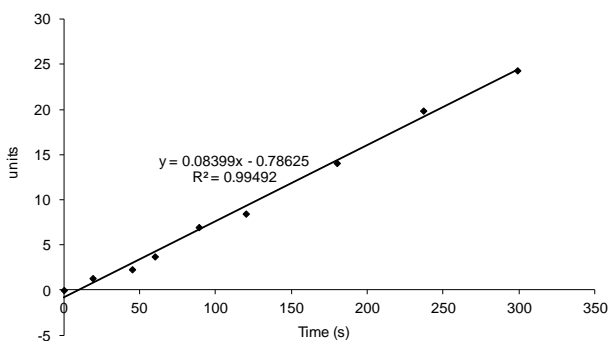

The units for the vertical scale are:  $\ln[(B_0A_t)/(B_tA_0)]/(A_0-B_0)$  where:  $A = [\text{PhCHO}]$ ,  $B = [\text{Me}_3\text{SiCN}]$  and the subscripts 0 and t refer to initial concentrations and concentrations at time t, respectively. The concentration of benzaldehyde was monitored.

Plot of  $k_{\text{obs}}$  against  $[\mathbf{3}]$

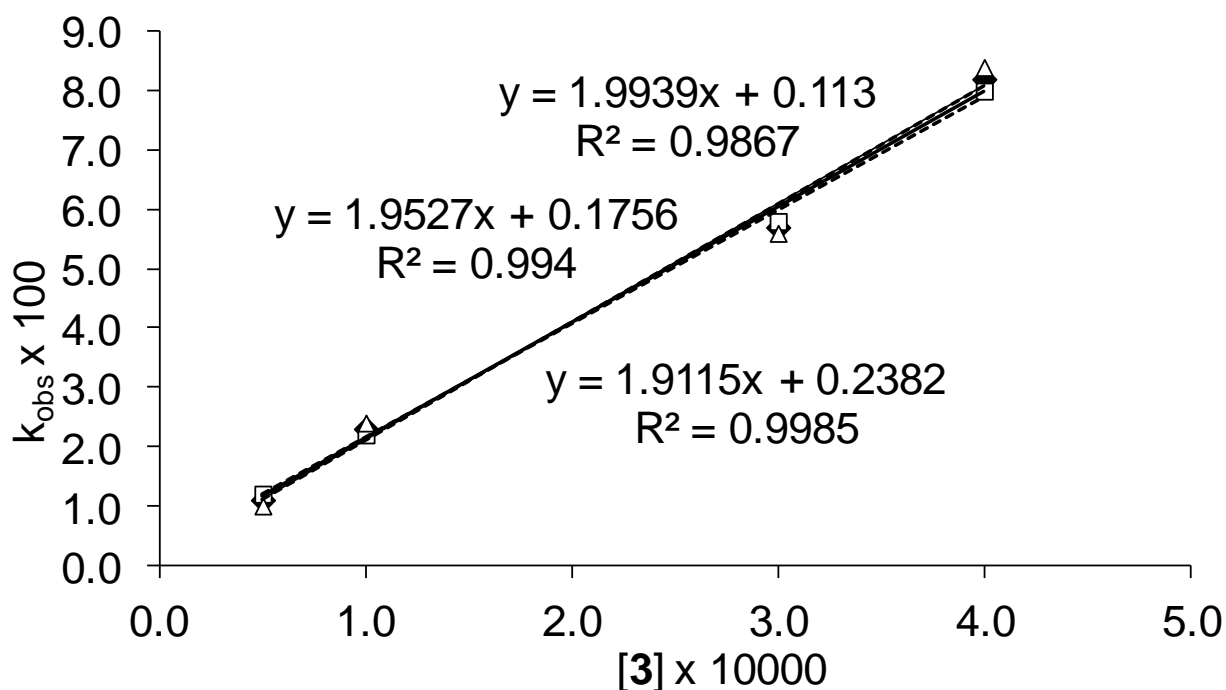

The dotted lines and empty data points show the rate data obtained from each of a duplicated series of kinetic experiments. The solid line and filled data points show the average of these two data sets and correspond to the data given in Figure 1 of the manuscript. The error in the rate constant was estimated from the difference in slopes of the three lines in this plot.



## Addition of trimethylsilyl cyanide to benzaldehyde catalysed by Bu<sub>4</sub>NCN 4

[Bu<sub>4</sub>NCN] = 3x10<sup>-5</sup> M (corresponds to 0.005 mol%)

*Run 1*

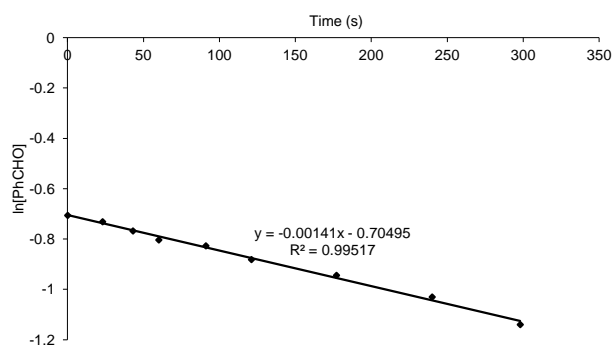

*Run 2*

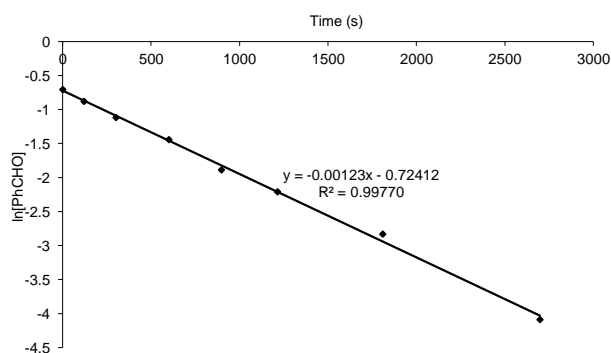

[Bu<sub>4</sub>NCN] = 4x10<sup>-5</sup> M (corresponds to 0.007 mol%)

*Run 1*

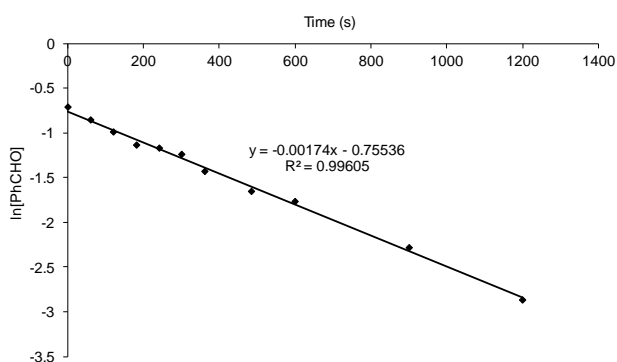

*Run 2*

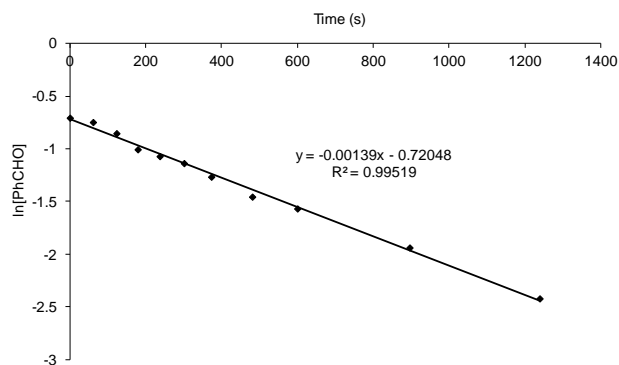

[Bu<sub>4</sub>NCN] = 5x10<sup>-5</sup> M (corresponds to 0.01 mol%)

*Run 1*

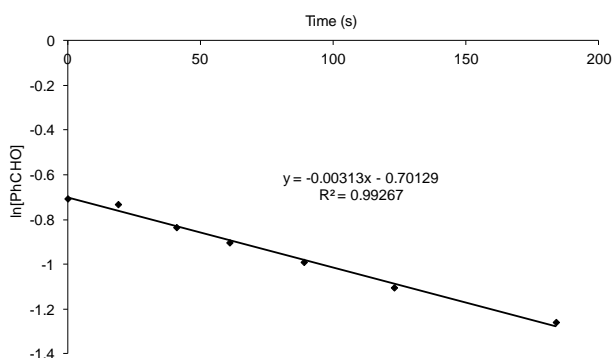

*Run 2*

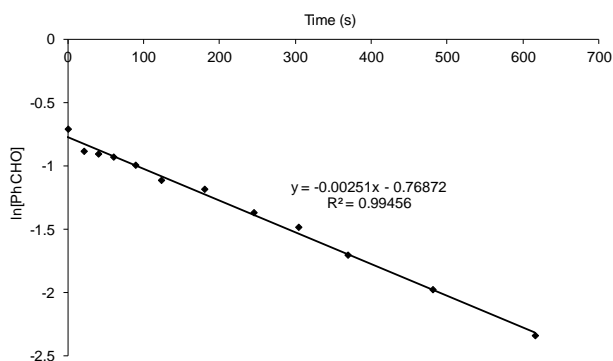

$[\text{Bu}_4\text{NCN}] = 2 \times 10^{-4} \text{ M}$  (corresponds to 0.03 mol%)

Run 1

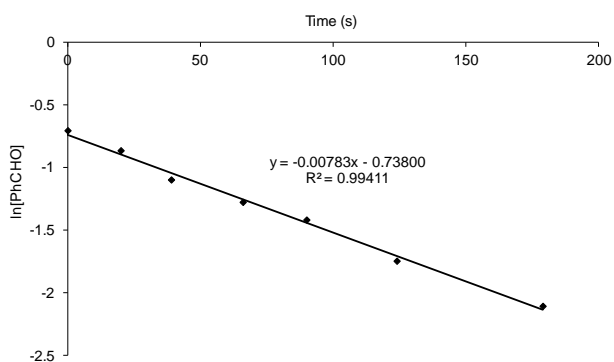

Run 2

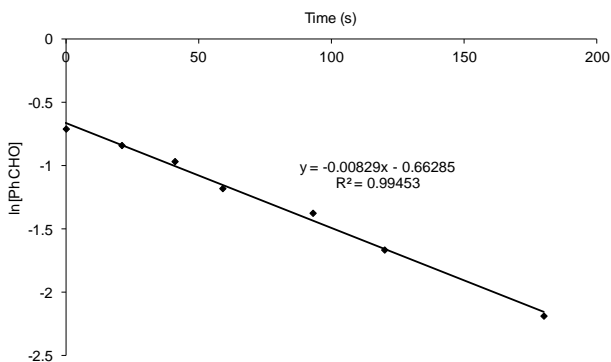

$[\text{Bu}_4\text{NCN}] = 3 \times 10^{-4} \text{ M}$  (corresponds to 0.05 mol%)

Run 1

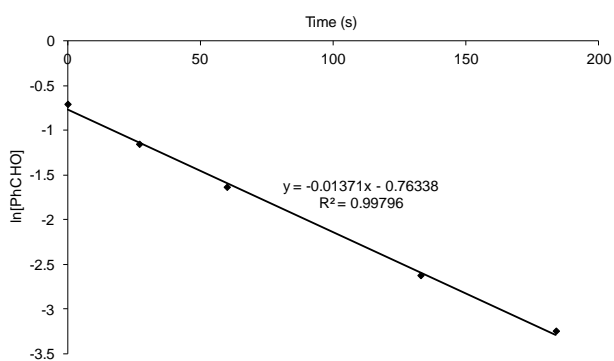

Run 2

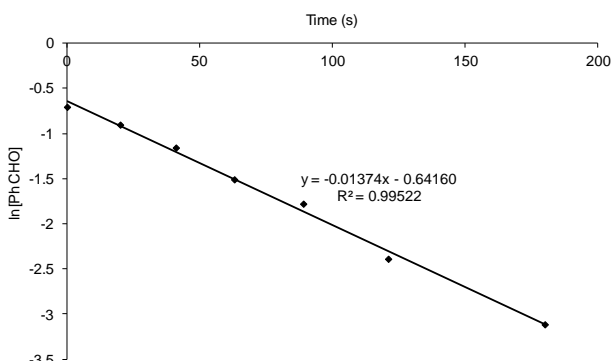

Plot of  $k_{\text{obs}}$  against [4]

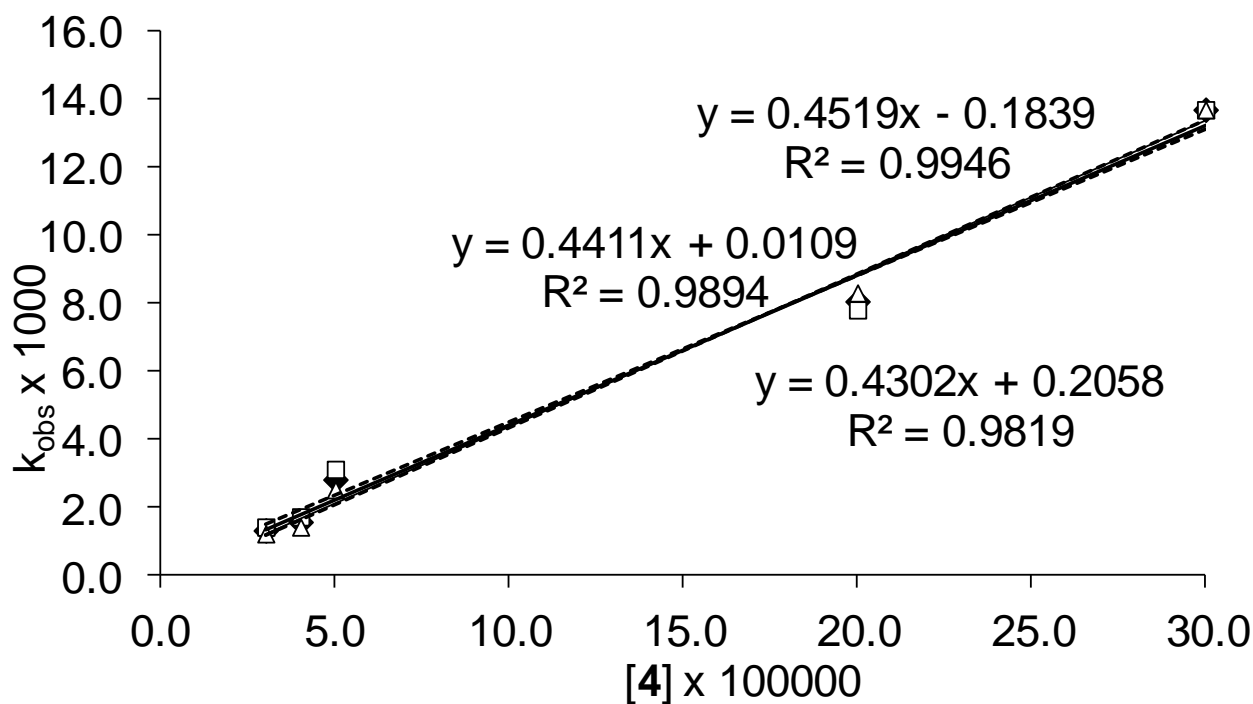

The dotted lines and empty data points show the rate data obtained from each of a duplicated series of kinetic experiments. The solid line and filled data points show the average of these two data sets and correspond to the data given in Figure 1 of the manuscript. The error in the rate constant was estimated from the difference in slopes of the three lines in this plot.

## Kinetic plots used to construct the Hammett plots

### Addition of trimethylsilyl cyanide to benzaldehydes catalysed by Et<sub>3</sub>N 1

#### Benzaldehyde run 1

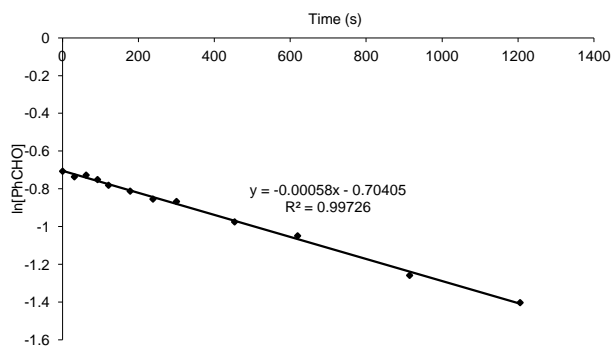

#### Benzaldehyde run 2

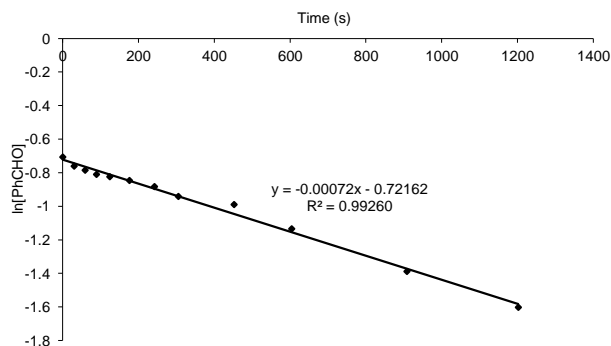

#### 3-Chlorobenzaldehyde run 1

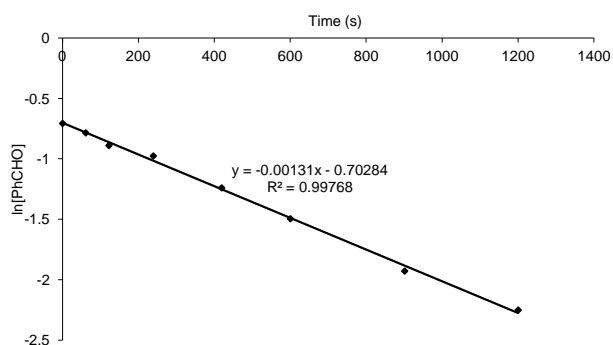

#### 3-Chlorobenzaldehyde run 2

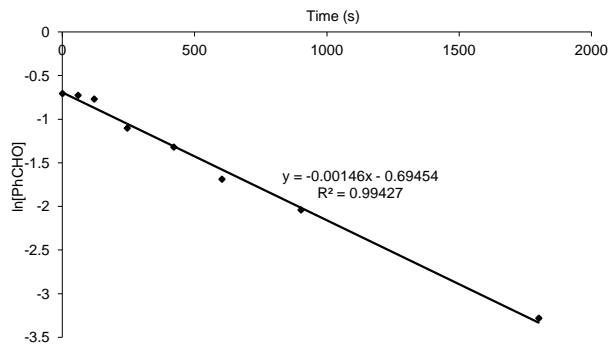

#### 3-Fluorobenzaldehyde run 1

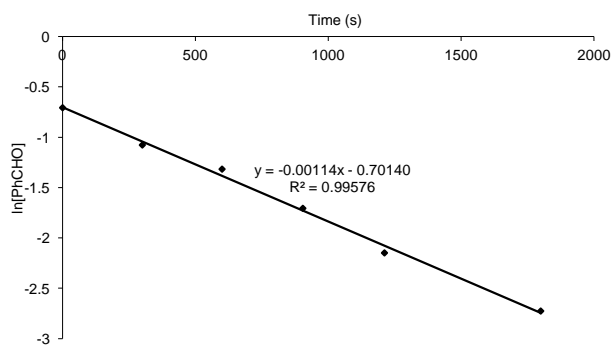

#### 3-Fluorobenzaldehyde run 2

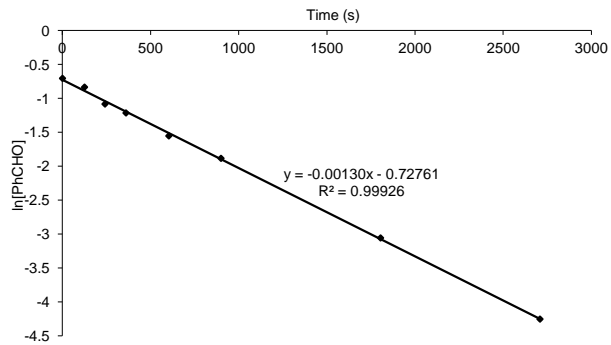

### 4-Chlorobenzaldehyde run 1

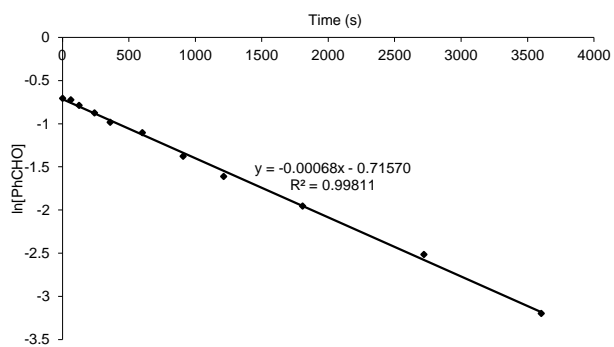

### 4-Chlorobenzaldehyde run 2

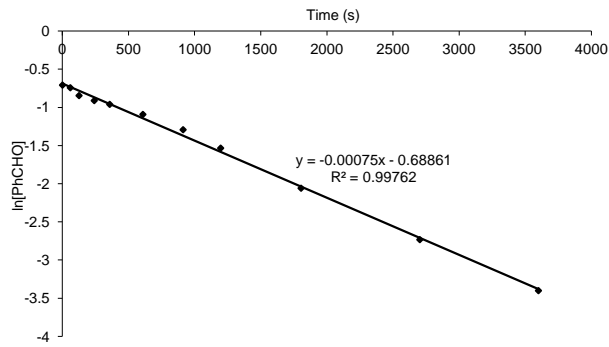

### 4-Fluorobenzaldehyde run 1

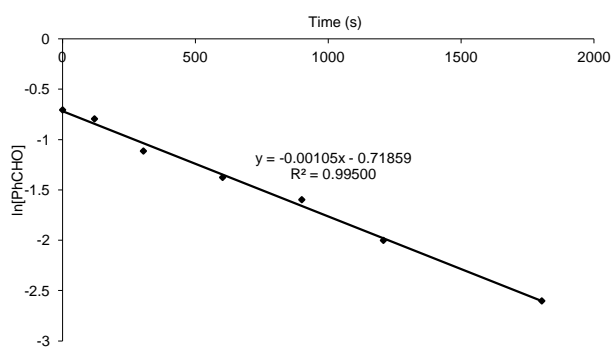

### 4-Fluorobenzaldehyde run 2

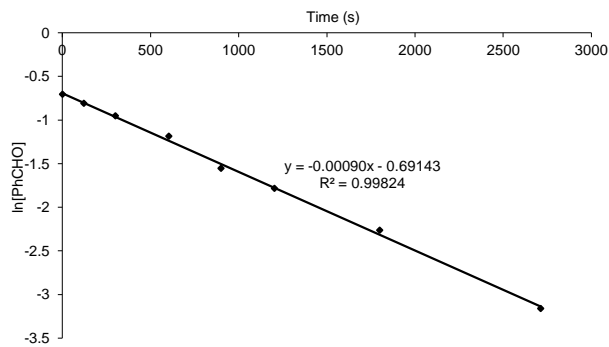

### 4-Thiomethylbenzaldehyde run 1

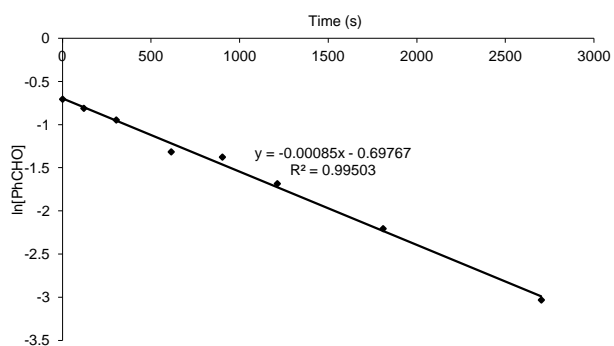

### 4-Thiomethylbenzaldehyde run 2

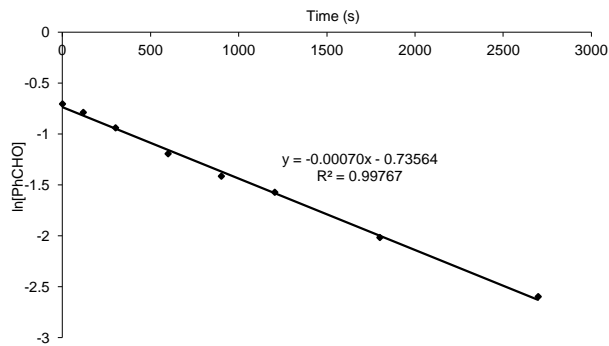

### 3-Methylbenzaldehyde run 1

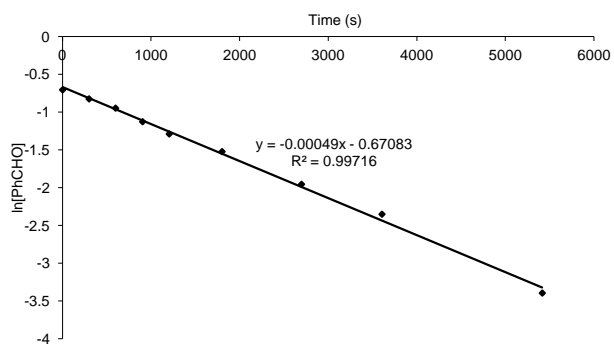

### 3-Methylbenzaldehyde run 2

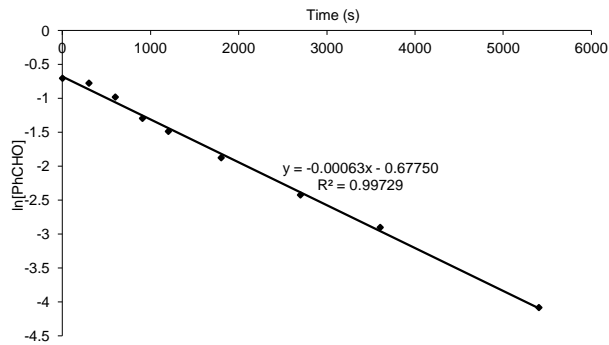

#### 4-Methylbenzaldehyde run 1

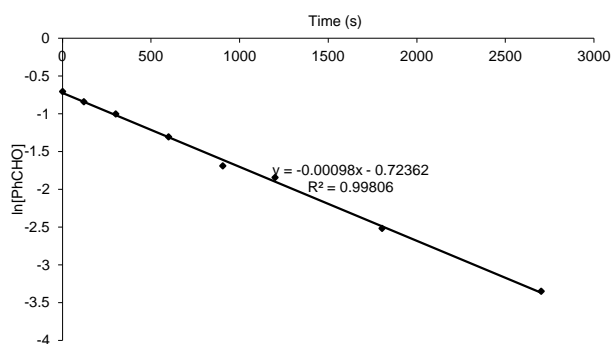

#### 4-Methylbenzaldehyde run 2

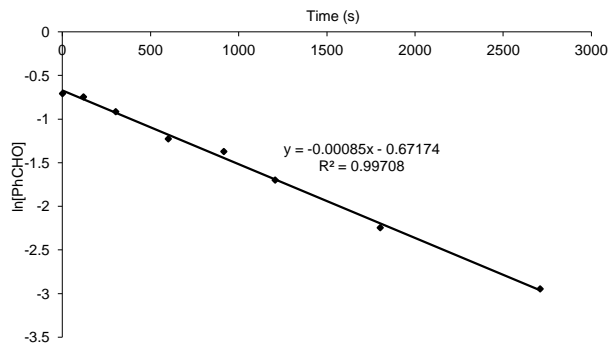

#### 3,4-Dimethylbenzaldehyde run 1

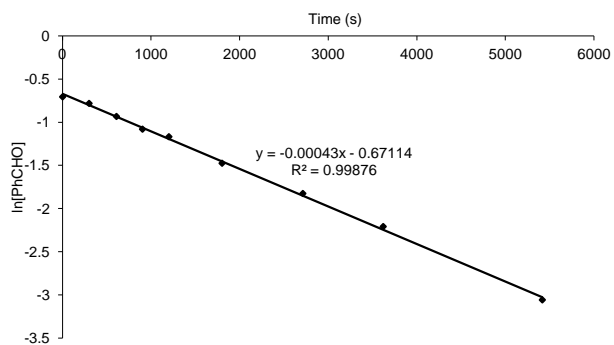

#### 3,4-Dimethylbenzaldehyde run 2

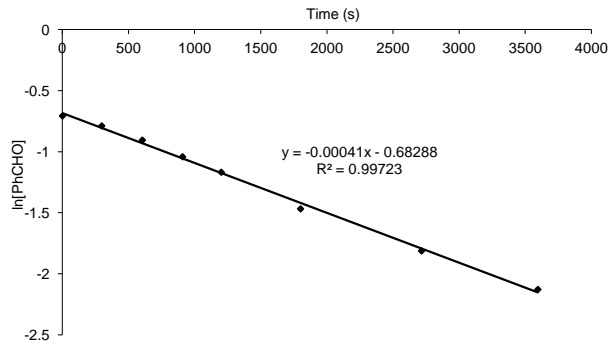

#### 4-Methoxybenzaldehyde run 1

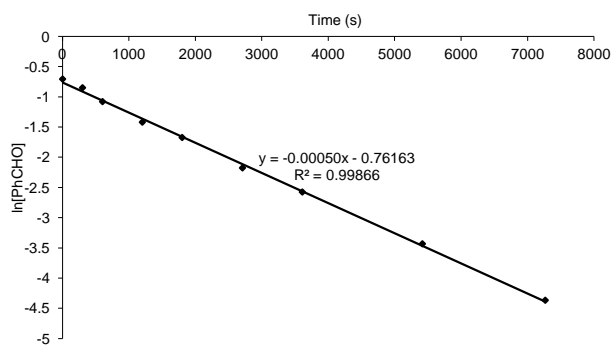

#### 4-Methoxybenzaldehyde run 2

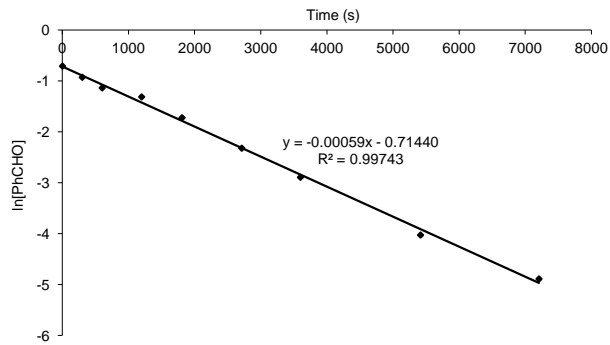

### Hammett plot for the reaction catalysed by Et<sub>3</sub>N 1

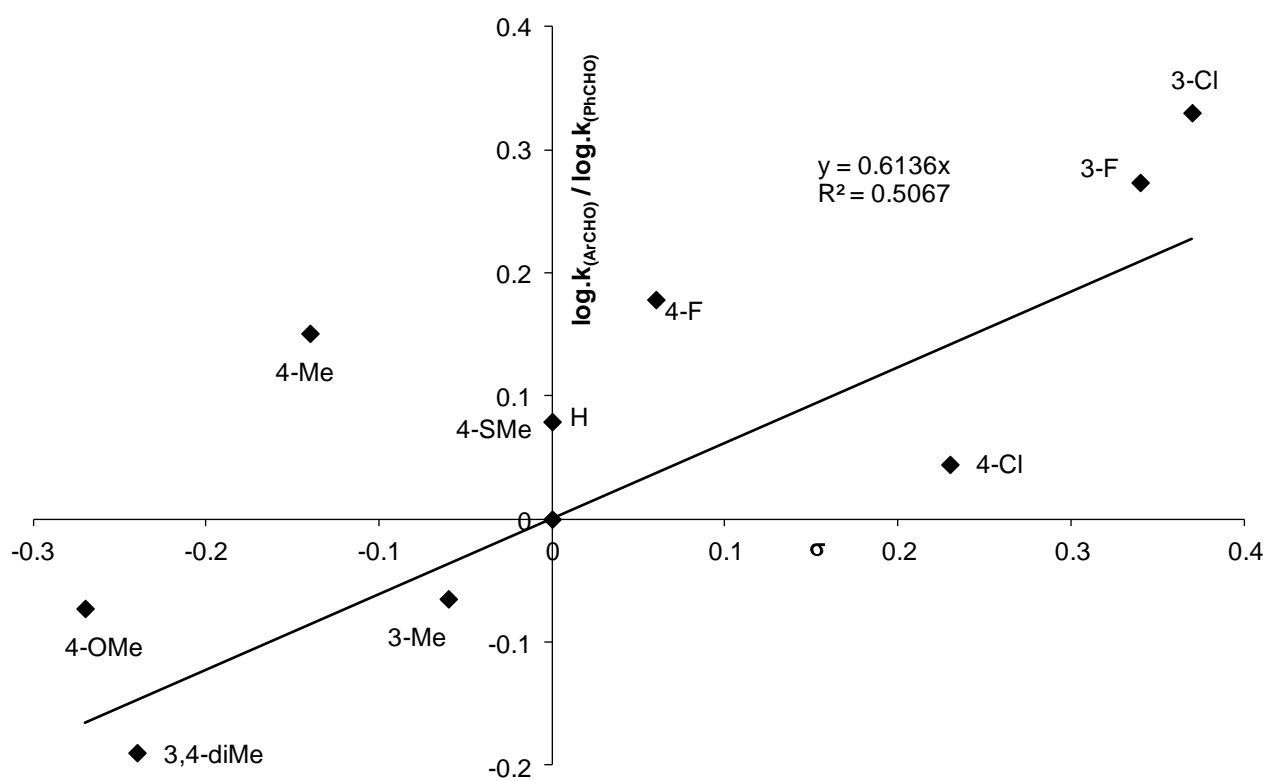

Only the average of two individual rate constants were used to construct this graph.

## Addition of trimethylsilyl cyanide to benzaldehydes catalysed by Bu<sub>4</sub>NNCS 2

### Benzaldehyde run 1

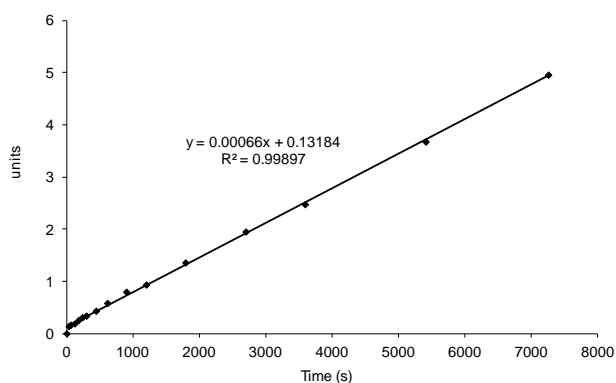

### Benzaldehyde run 2

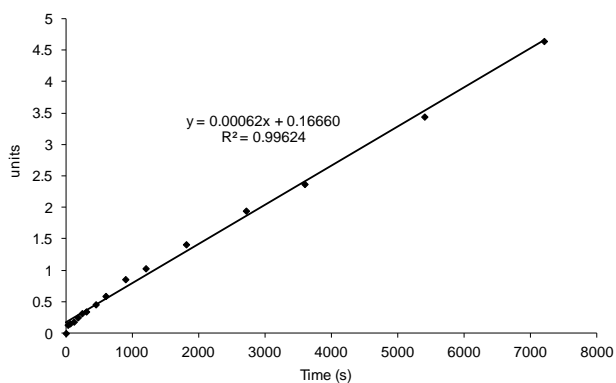

### 3,5-Difluororobenzaldehyde run 1

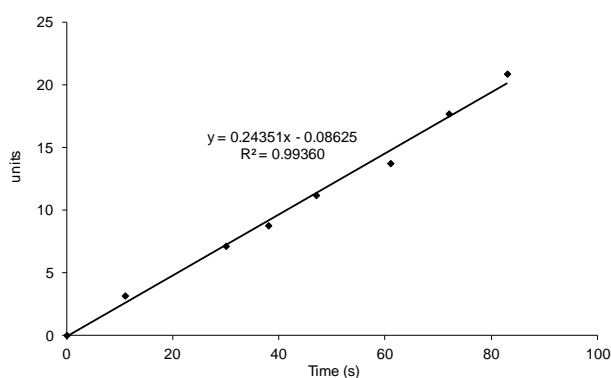

### 3,5-Difluororobenzaldehyde run 2

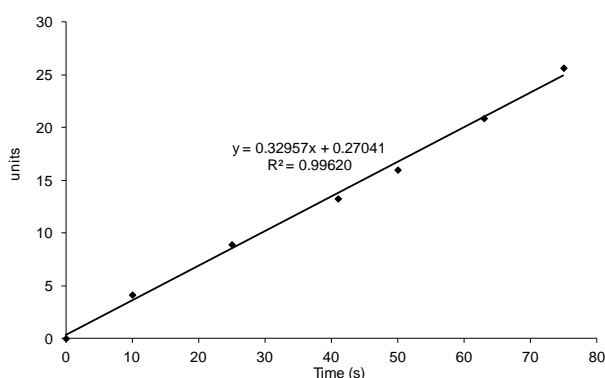

### 4-Trifluoromethylbenzaldehyde run 1

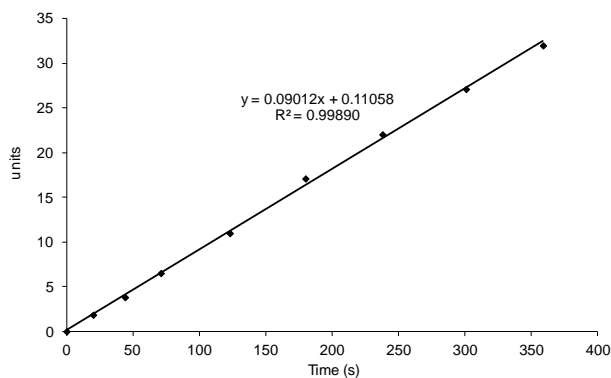

### 4-Trifluoromethylbenzaldehyde run 2

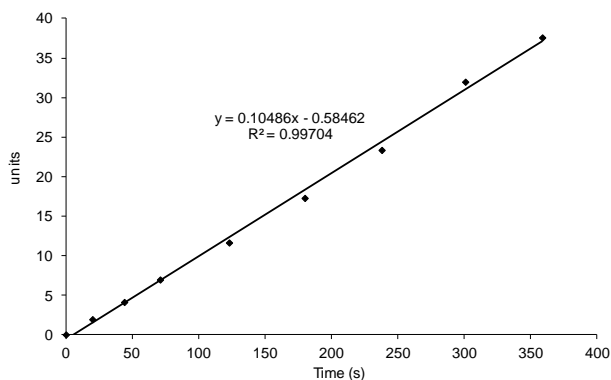

The units for the vertical scale are:  $\ln[(B_0A_t)/(B_tA_0)]/(A_0-B_0)$  where: A = [PhCHO], B = [Me<sub>3</sub>SiCN] and the subscripts 0 and t refer to initial concentrations and concentrations at time t, respectively. The concentration of benzaldehyde was monitored.

### 3-Chlorobenzaldehyde run 1

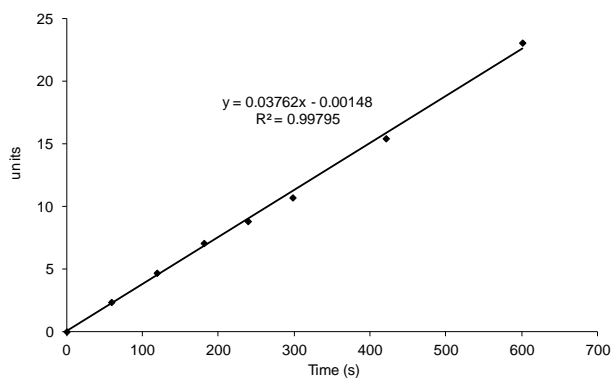

### 3-Chlorobenzaldehyde run 2

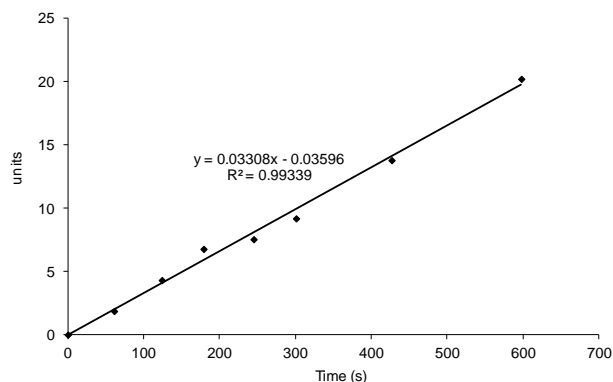

### 3-Fluorobenzaldehyde run 1

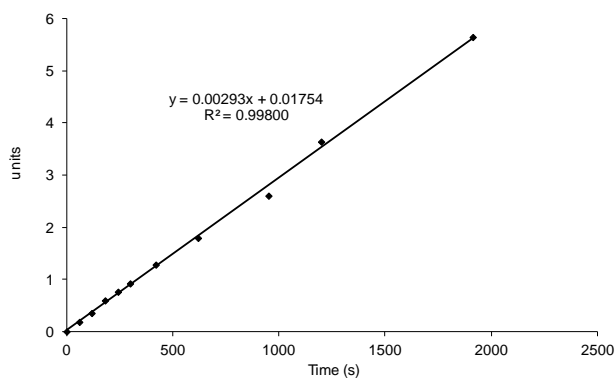

### 3-Fluorobenzaldehyde run 2

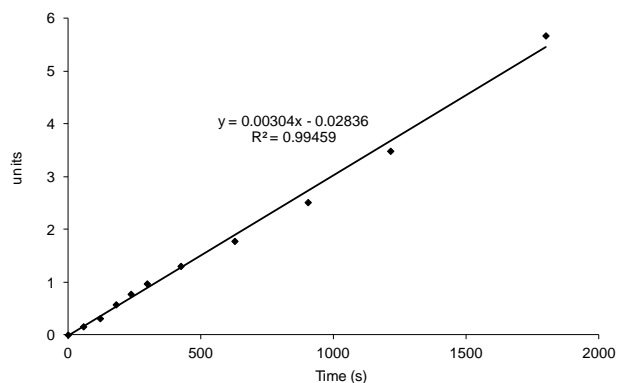

### 4-Chlorobenzaldehyde run 1

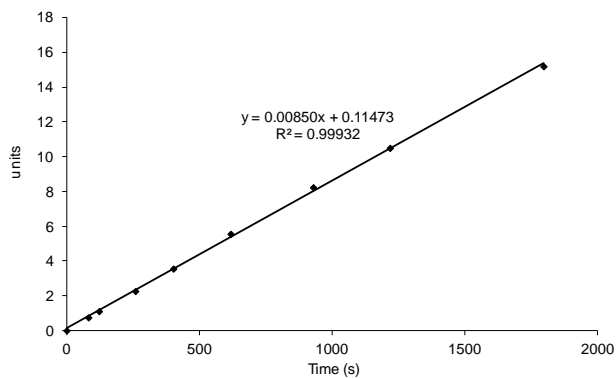

### 4-Chlorobenzaldehyde run 2

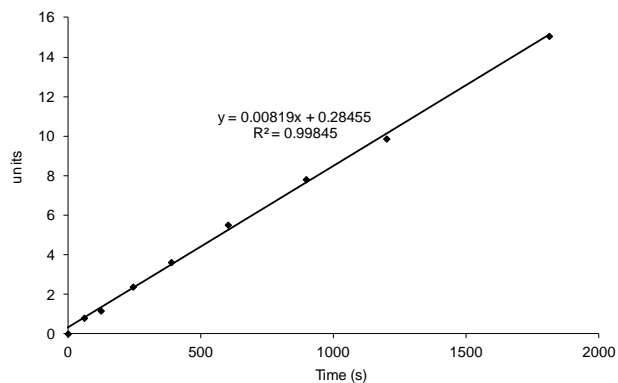

### 4-Fluorobenzaldehyde run 1

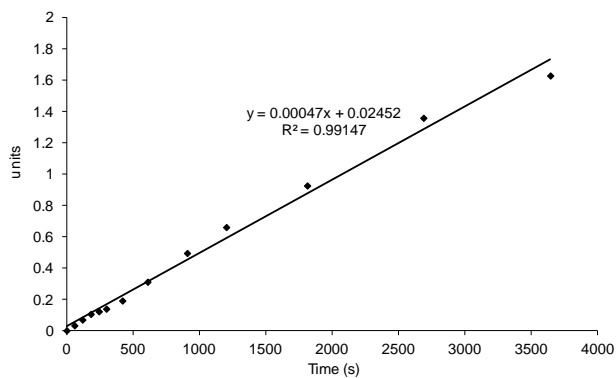

### 4-Fluorobenzaldehyde run 2

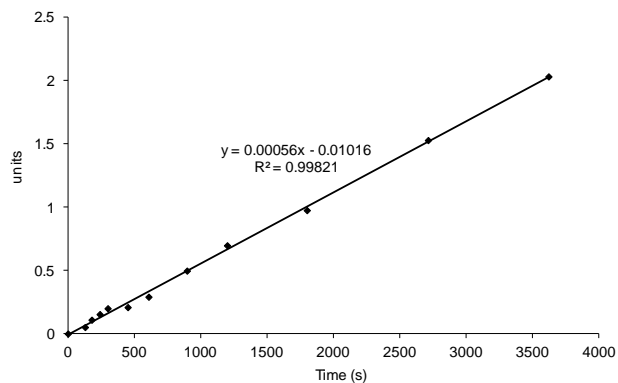



#### 4-Thiomethylbenzaldehyde run 1

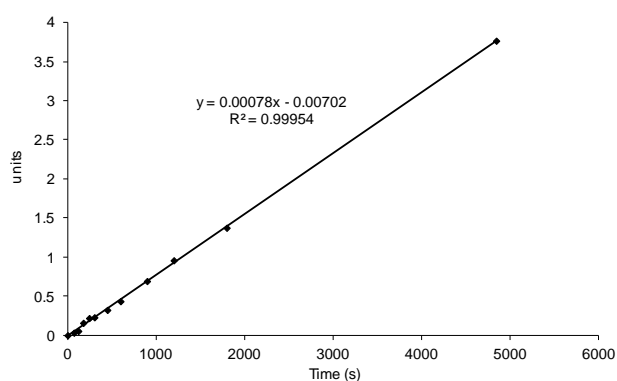

#### 4-Thiomethylbenzaldehyde run 2

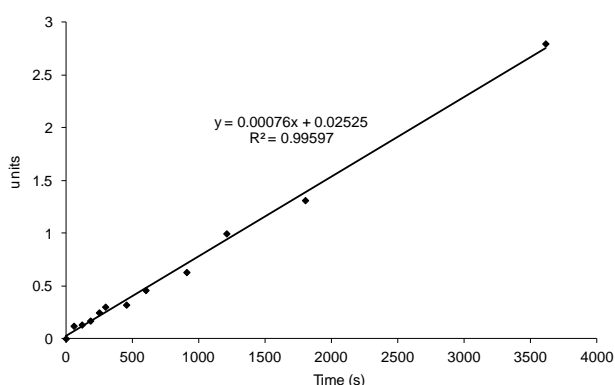

#### 3-Methylbenzaldehyde run 1

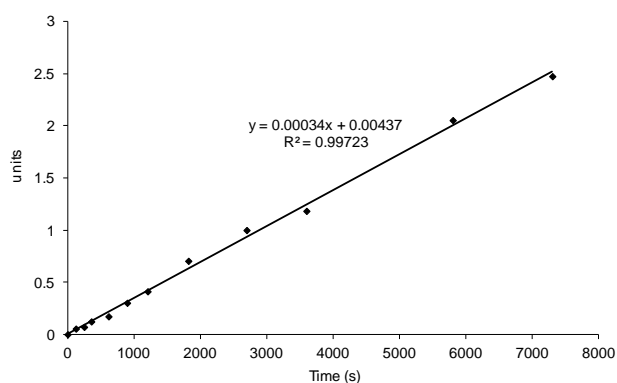

#### 3-Methylbenzaldehyde run-2

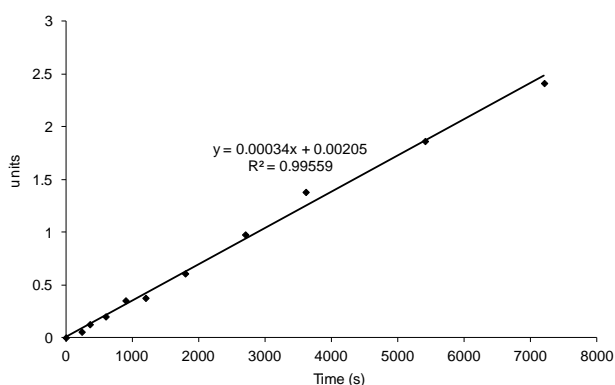

#### 4-Methylbenzaldehyde run 1

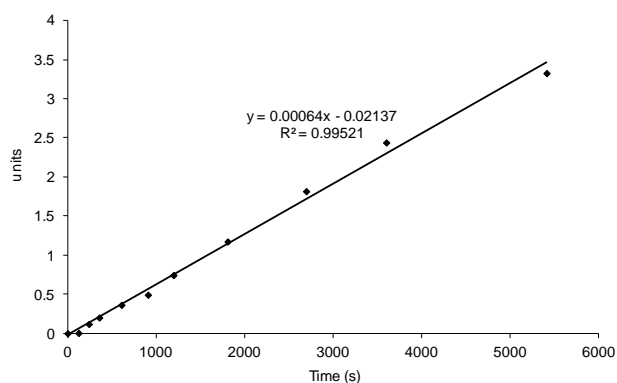

#### 4-Methylbenzaldehyde run 2

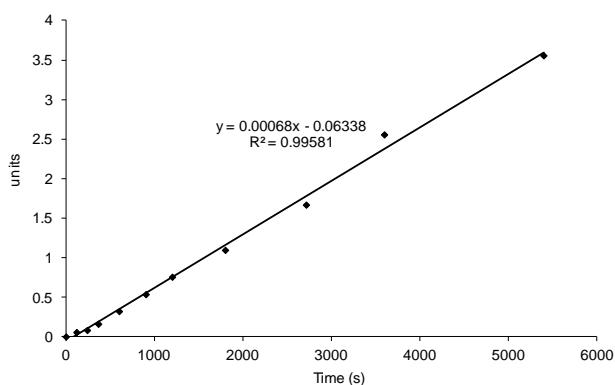

The units for the vertical scale are:  $\ln[(B_0A_t)/(B_tA_0)]/(A_0 - B_0)$  where: A = [PhCHO], B = [Me<sub>3</sub>SiCN] and the subscripts 0 and t refer to initial concentrations and concentrations at time t, respectively. The concentration of benzaldehyde was monitored.

### 3,4-Dimethylbenzaldehyde run 1

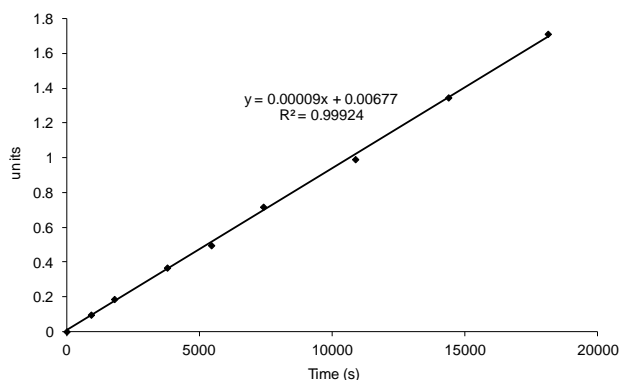

### 3,4-Dimethylbenzaldehyde run 2

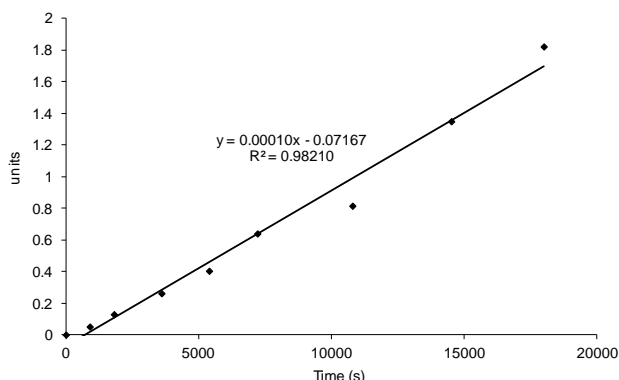

### 4-Methoxybenzaldehyde run 1

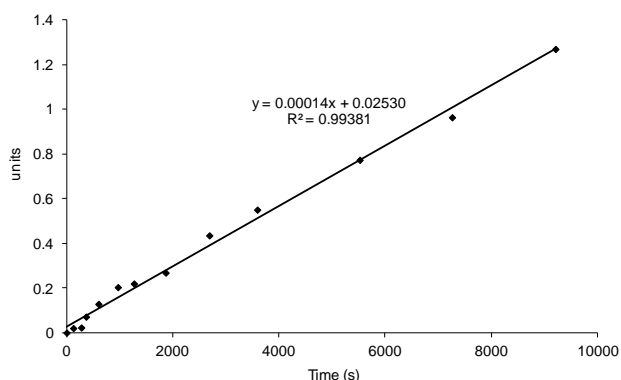

### 4-Methoxybenzaldehyde run 2

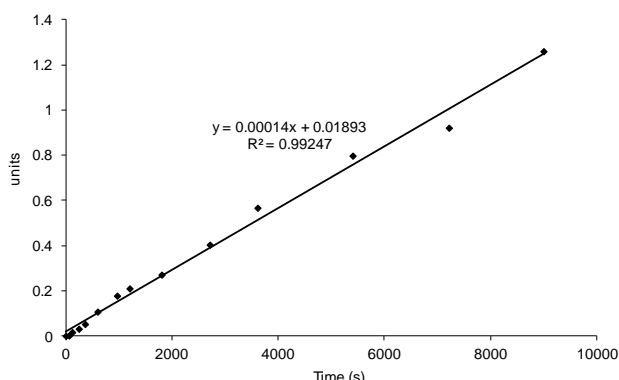

The units for the vertical scale are:  $\ln[(B_0A_t)/(B_tA_0)]/(A_0-B_0)$  where: A = [PhCHO], B = [Me<sub>3</sub>SiCN] and the subscripts 0 and t refer to initial concentrations and concentrations at time t, respectively. The concentration of benzaldehyde was monitored.

### Hammett plot for the reaction catalysed by Bu<sub>4</sub>NNCS 2

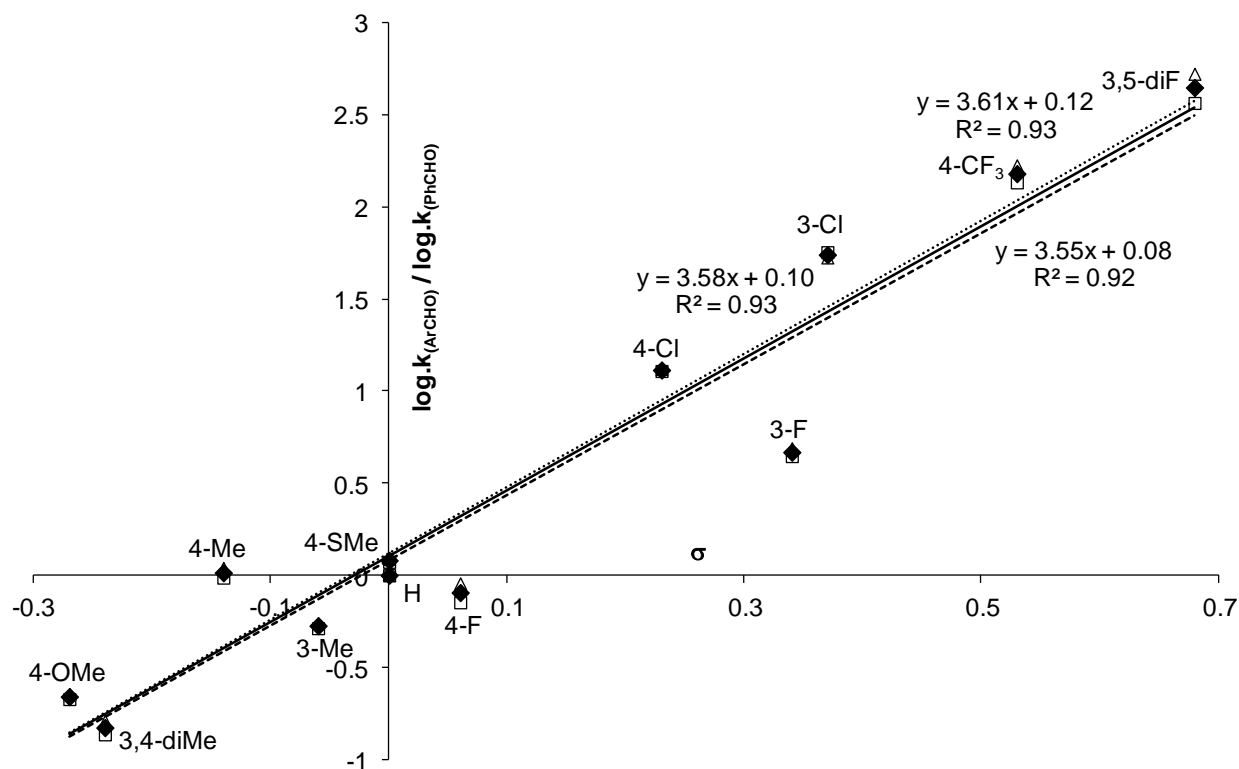

The filled diamonds and solid line correspond to the average rate data for each aldehyde whilst the unfilled squares and triangles and the broken lines correspond to each individual set of rate data.

## Addition of trimethylsilyl cyanide to benzaldehydes catalysed by Bu<sub>4</sub>NN<sub>3</sub> 3

### Benzaldehyde run 1

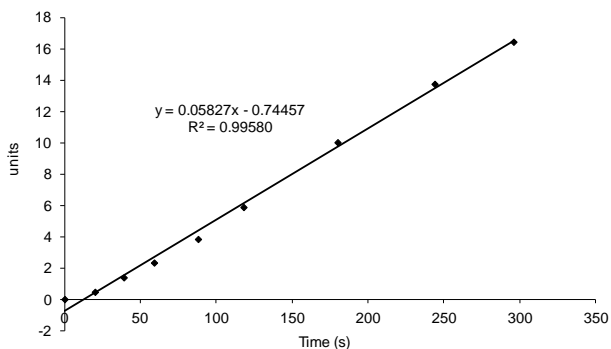

### Benzaldehyde run 2

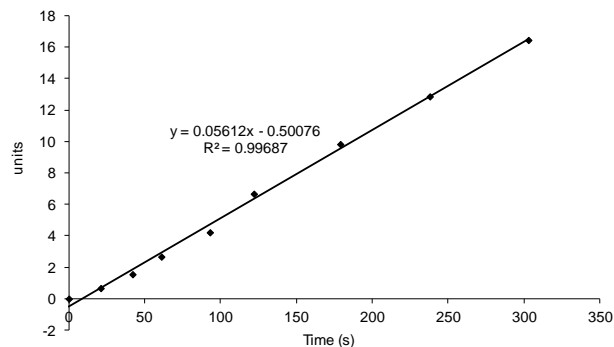

### 4-Chlorobenzaldehyde run 1

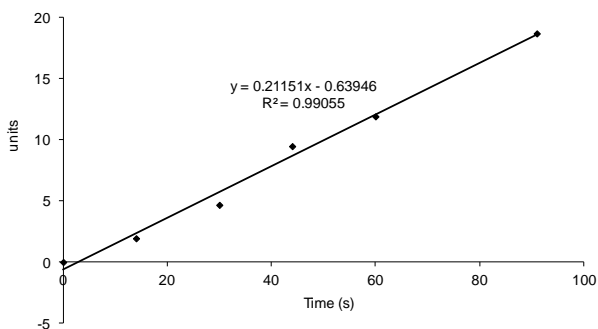

### 4-Chlorobenzaldehyde run 2

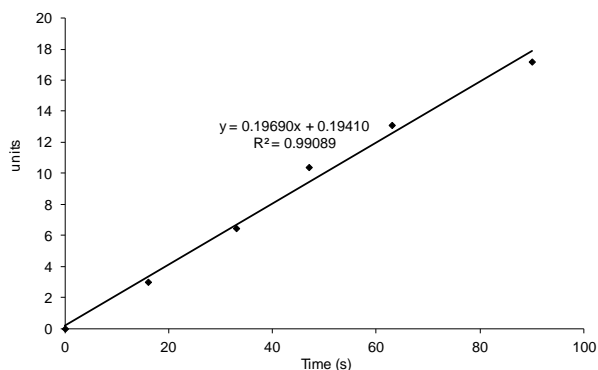

### 4-Fluorobenzaldehyde run 1

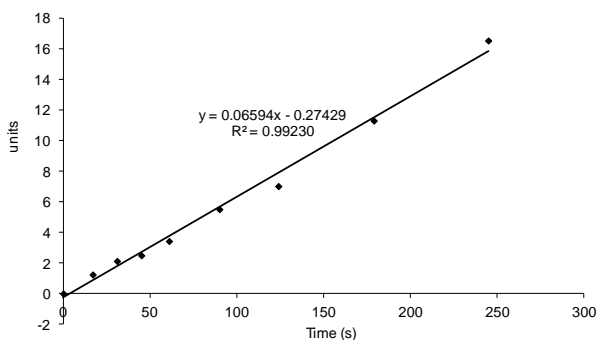

### 4-Fluorobenzaldehyde run 2

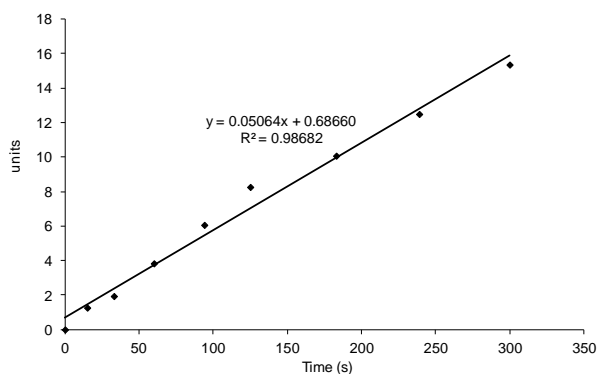

The units for the vertical scale are:  $\ln[(B_0A_t)/(B_tA_0)]/(A_0-B_0)$  where: A = [PhCHO], B = [Me<sub>3</sub>SiCN] and the subscripts 0 and t refer to initial concentrations and concentrations at time t, respectively. The concentration of benzaldehyde was monitored.

#### 4-Thiomethylbenzaldehyde run 1

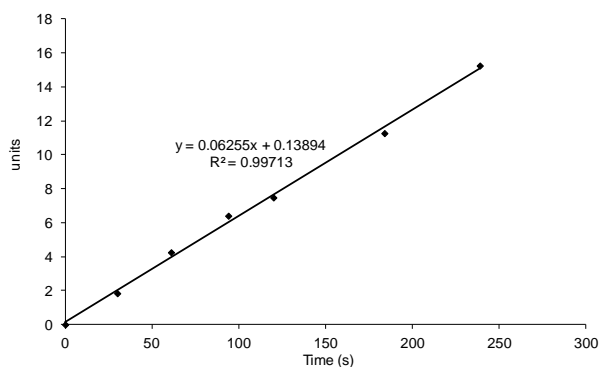

#### 4-Thiomethylbenzaldehyde run 2

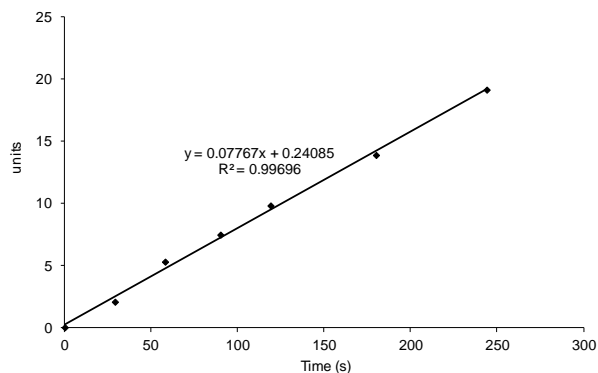

#### 3-Methylbenzaldehyde run 1

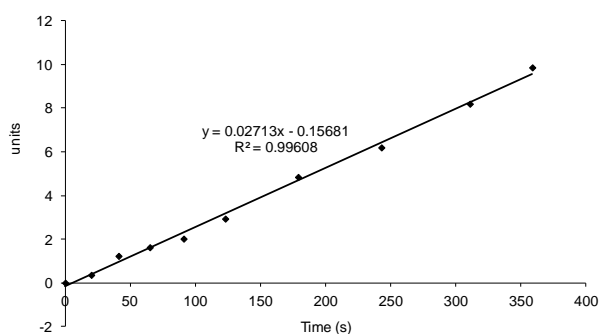

#### 3-Methylbenzaldehyde run 2

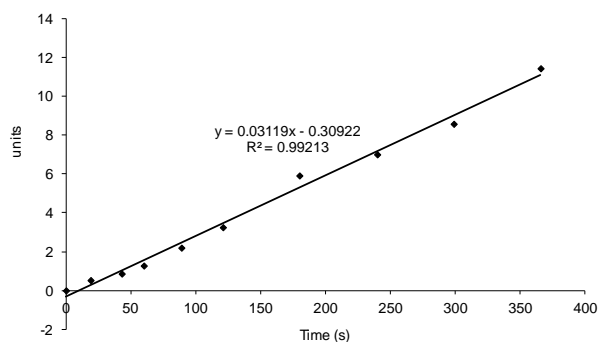

#### 4-Methylbenzaldehyde run 1

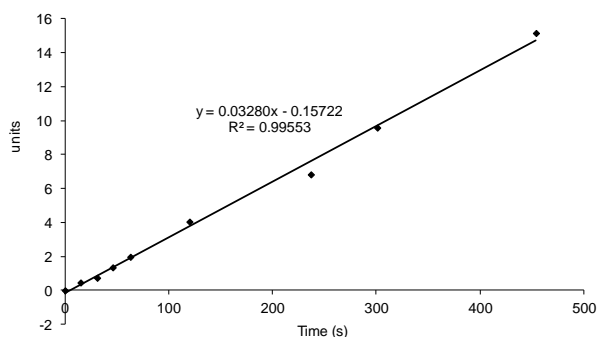

#### 4-Methylbenzaldehyde run 2

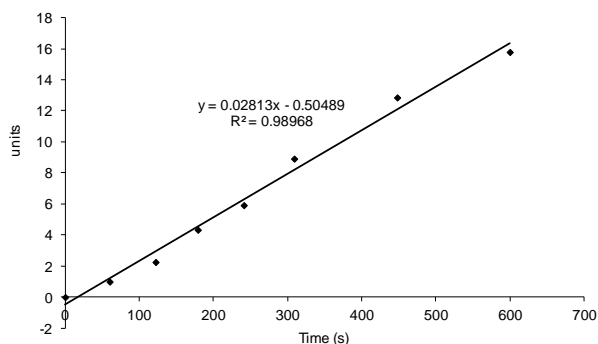

#### 3,4-Dimethylbenzaldehyde run 1

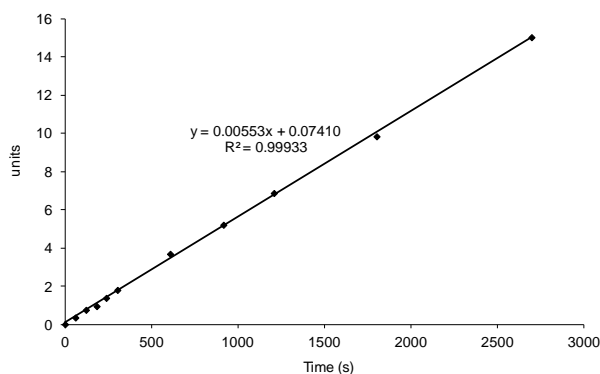

#### 3,4-Dimethylbenzaldehyde run 2

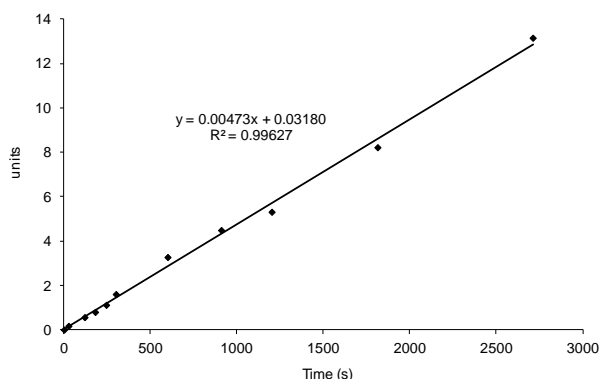

The units for the vertical scale are:  $\ln[(B_0A_t)/(B_tA_0)]/(A_0-B_0)$  where: A = [PhCHO], B = [Me<sub>3</sub>SiCN] and the subscripts 0 and t refer to initial concentrations and concentrations at time t, respectively. The concentration of benzaldehyde was monitored.

#### 4-Methoxybenzaldehyde run 1

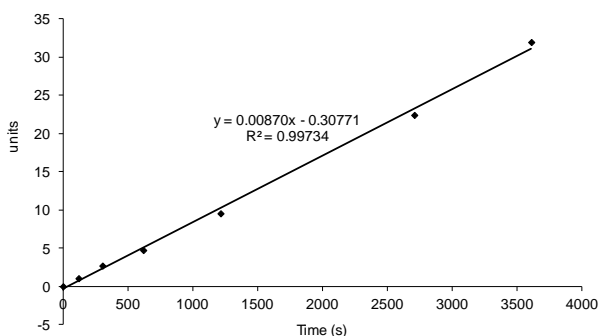

#### 4-Methoxybenzaldehyde run 2

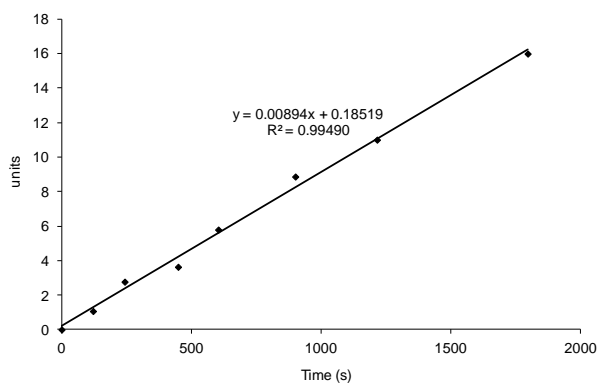

The units for the vertical scale are:  $\ln[(B_0A_t)/(B_tA_0)]/(A_0-B_0)$  where:  $A = [\text{PhCHO}]$ ,  $B = [\text{Me}_3\text{SiCN}]$  and the subscripts 0 and t refer to initial concentrations and concentrations at time t, respectively. The concentration of benzaldehyde was monitored.

#### Hammett plot for the reaction catalysed by Bu<sub>4</sub>NN<sub>3</sub> 3

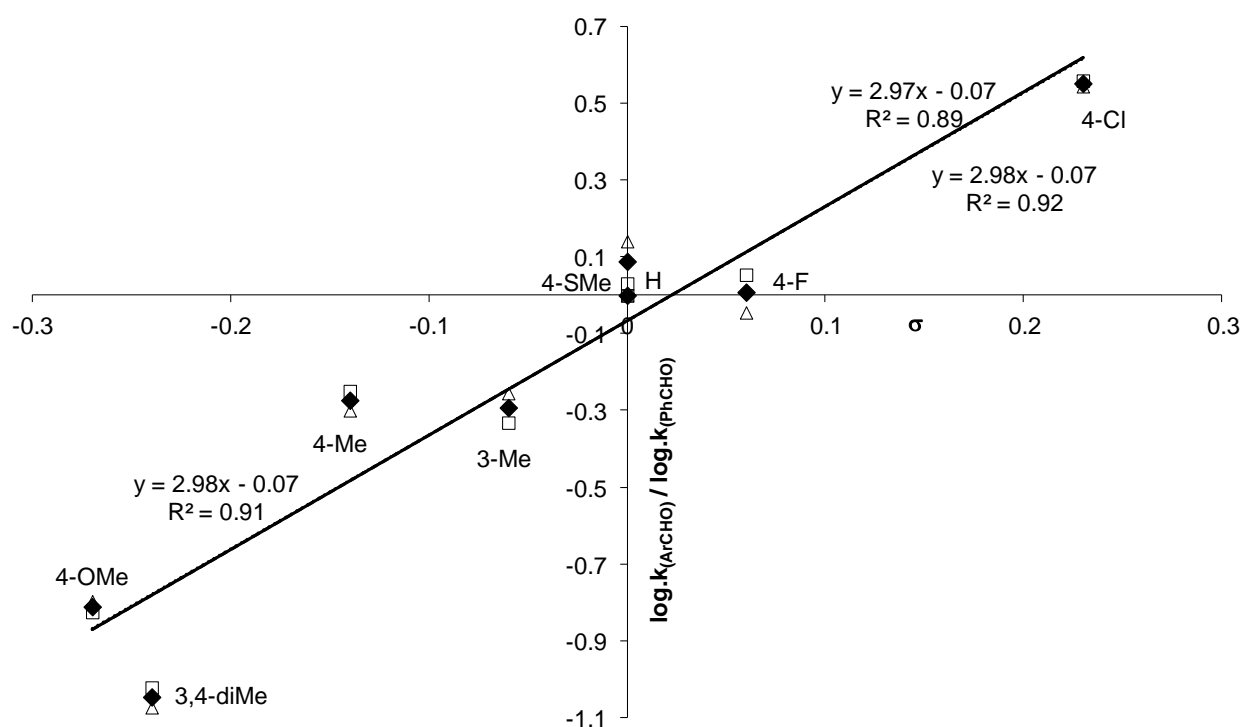

The filled diamonds and solid line correspond to the average rate data for each aldehyde whilst the unfilled squares and triangles and the broken lines correspond to each individual set of rate data.

## Addition of trimethylsilyl cyanide to benzaldehydes catalysed by Bu<sub>4</sub>NCN 4

### Benzaldehyde run 1

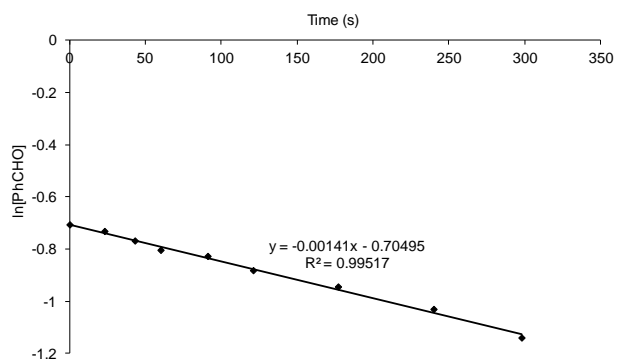

### Benzaldehyde run 2

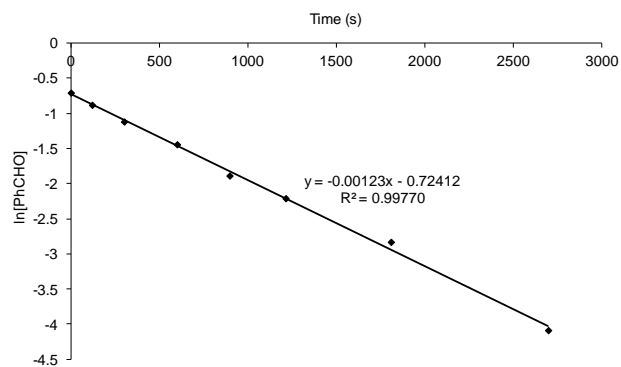

### 3-Chlorobenzaldehyde run 1

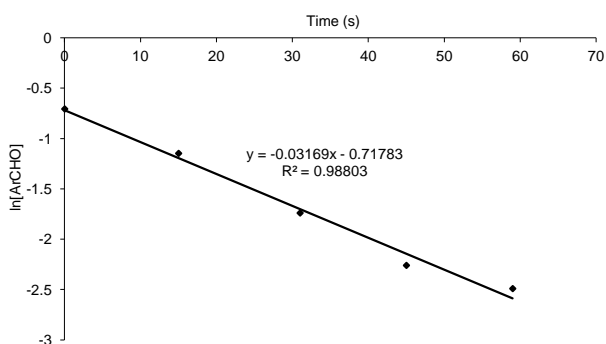

### 3-Chlorobenzaldehyde run 2

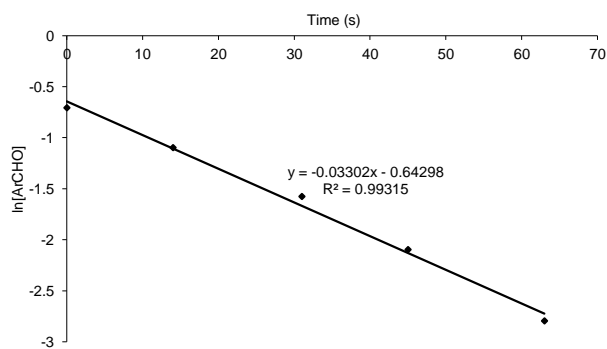

### 3-Fluorobenzaldehyde run 1

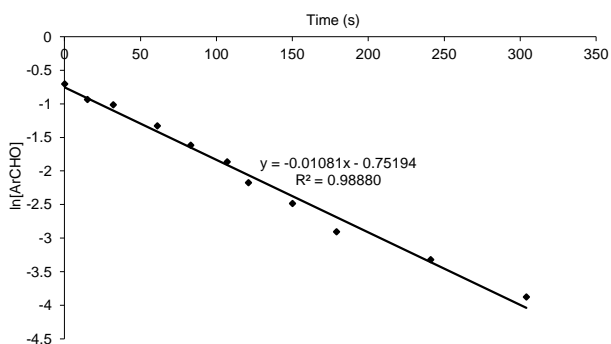

### 3-Fluorobenzaldehyde run 2

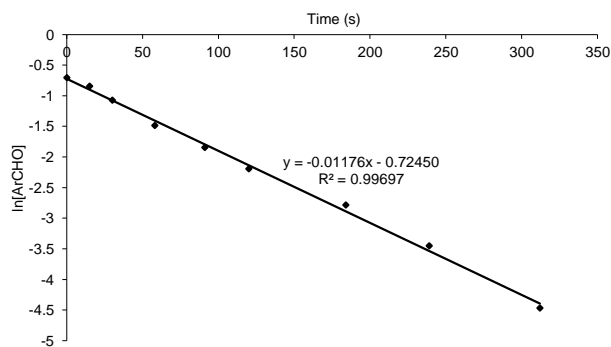

### 4-Chlorobenzaldehyde run 1

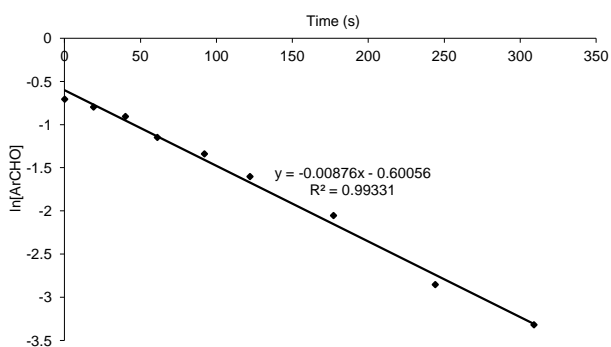

### 4-Chlorobenzaldehyde run 2

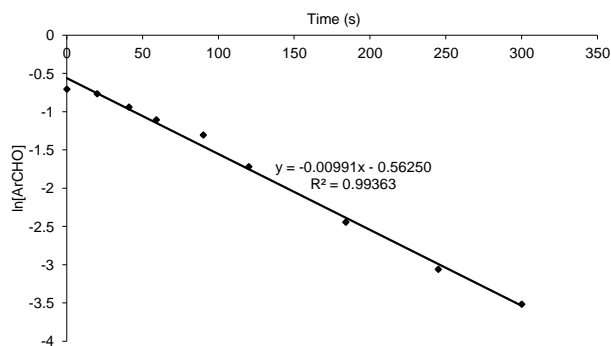

#### 4-Fluorobenzaldehyde run 1

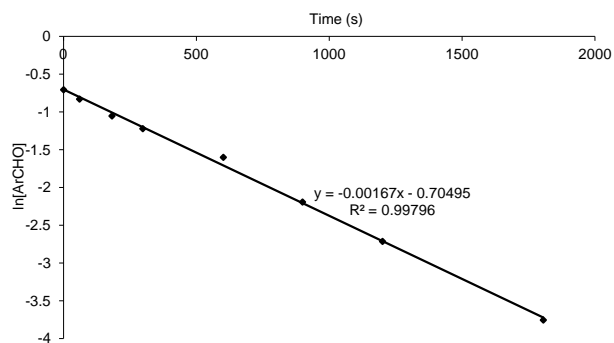

#### 4-Fluorobenzaldehyde run 2

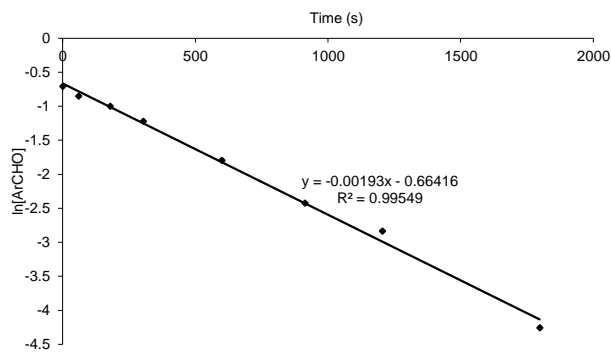

#### 4-Thiomethylbenzaldehyde run 1

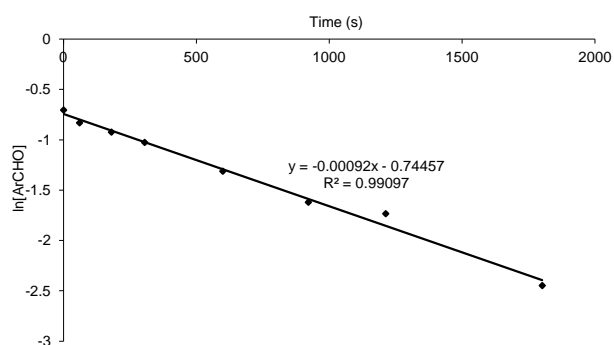

#### 4-Thiomethylbenzaldehyde run 2

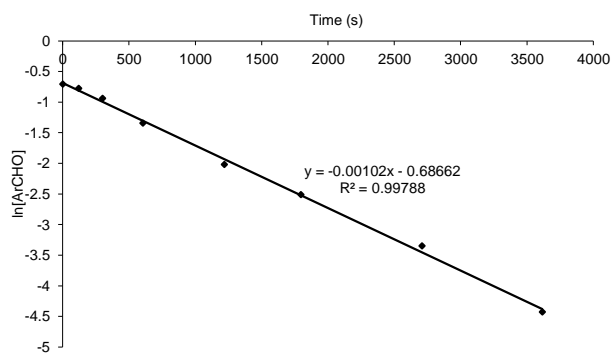

#### 3-Methylbenzaldehyde run 1

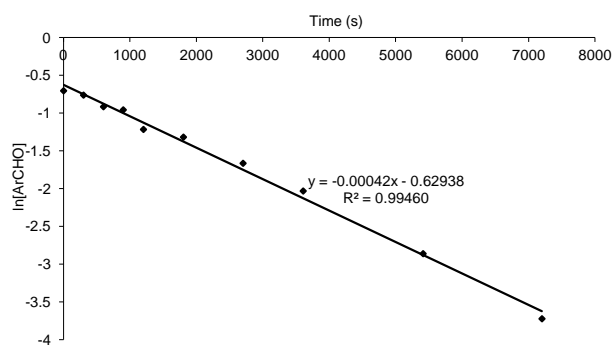

#### 3-Methylbenzaldehyde run 2

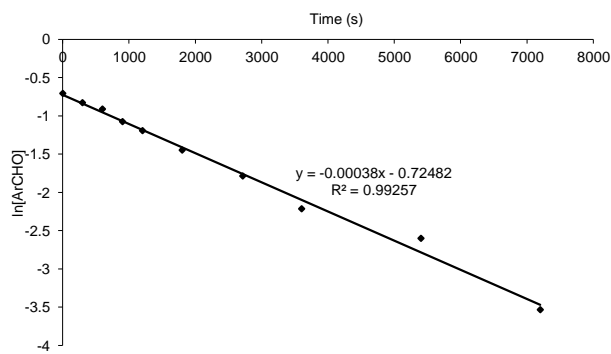

#### 4-Methylbenzaldehyde run 1

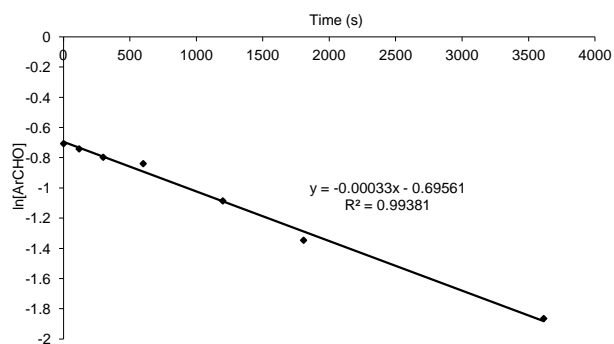

#### 4-Methylbenzaldehyde run 2

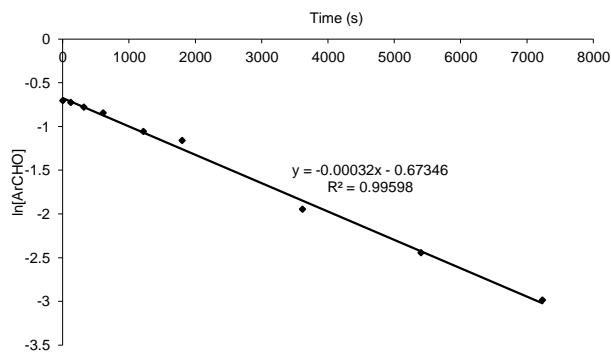

### 3,4-Dimethylbenzaldehyde run 1

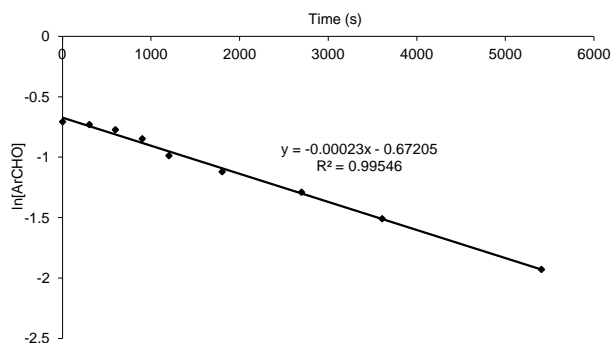

### 3,4-Dimethylbenzaldehyde run 2

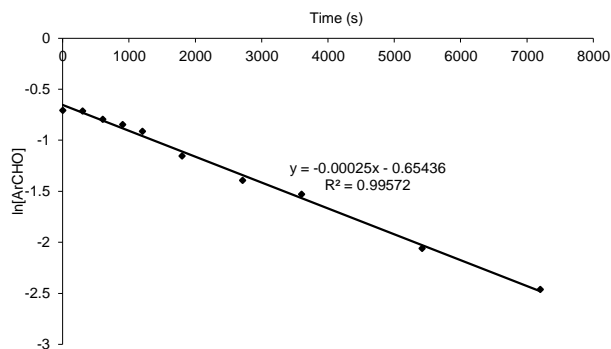

### 4-Methoxybenzaldehyde run 1

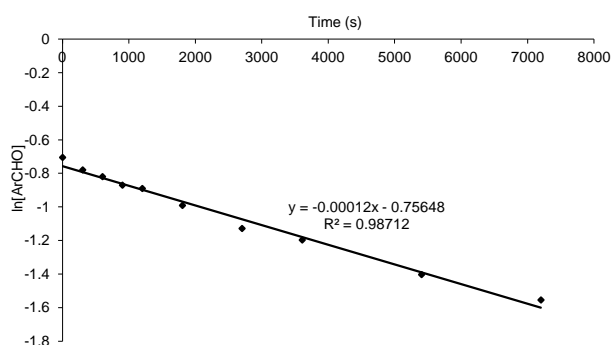

### 4-Methoxybenzaldehyde run 2

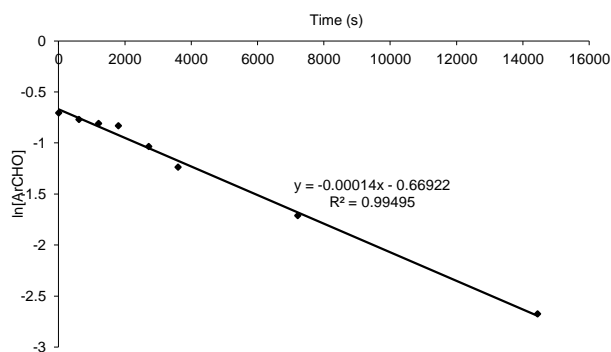

### Hammett plot for the reaction catalysed by $\text{Bu}_4\text{NCN}$

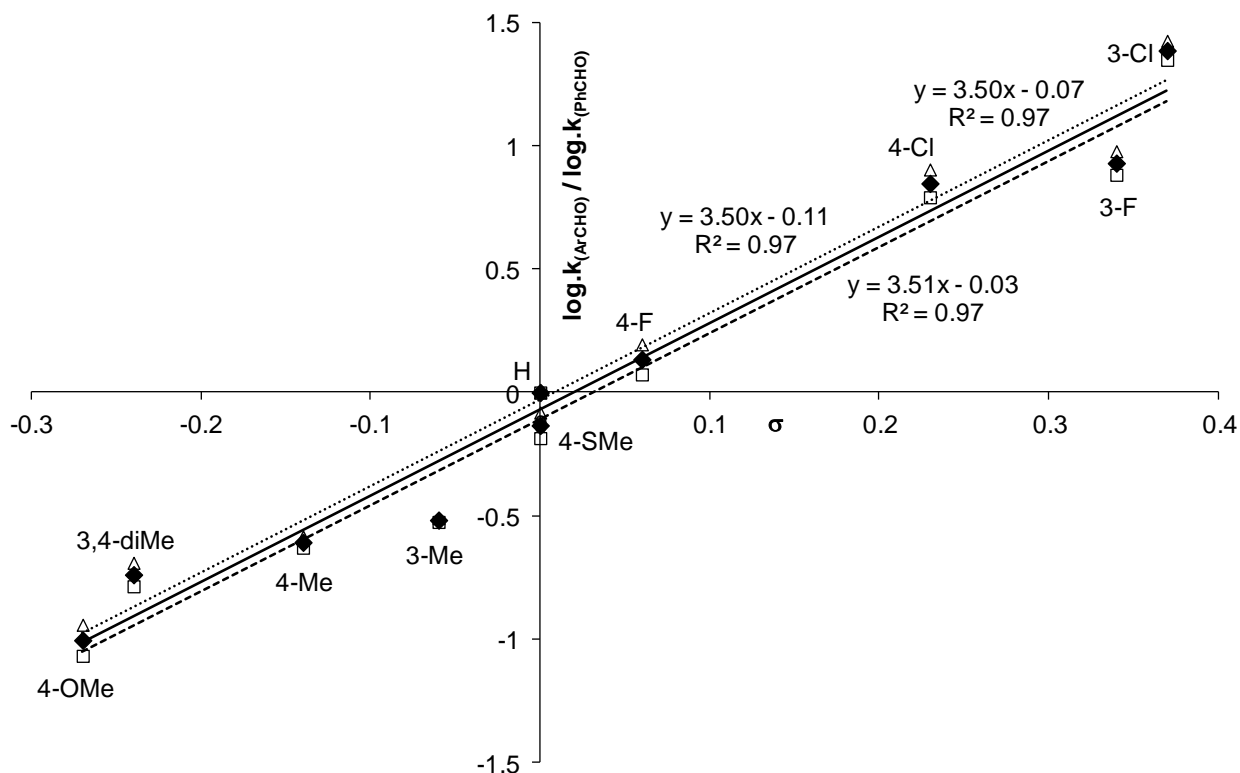

The filled diamonds and solid line correspond to the average rate data for each aldehyde whilst the unfilled squares and triangles and the broken lines correspond to each individual set of rate data.



## Addition of trimethylsilyl cyanide to benzaldehydes catalysed by Bu<sub>4</sub>NNCS 2 in a stopped flow kinetics system

Benzaldehyde run 1

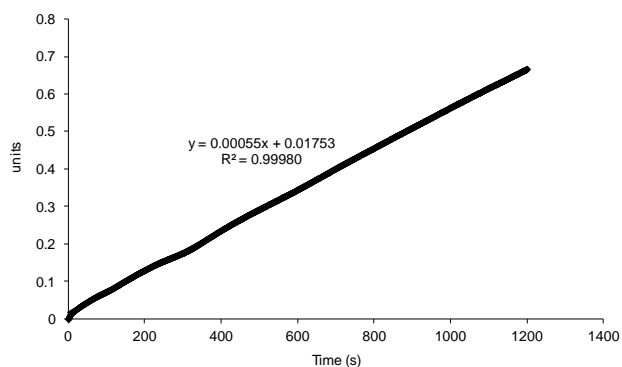

Benzaldehyde run 2

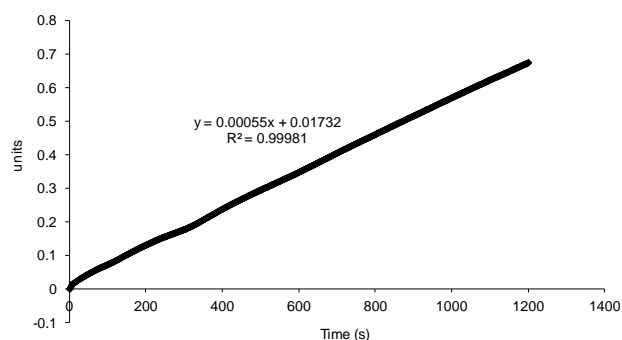

3,5-Difluorobenzaldehyde run 1

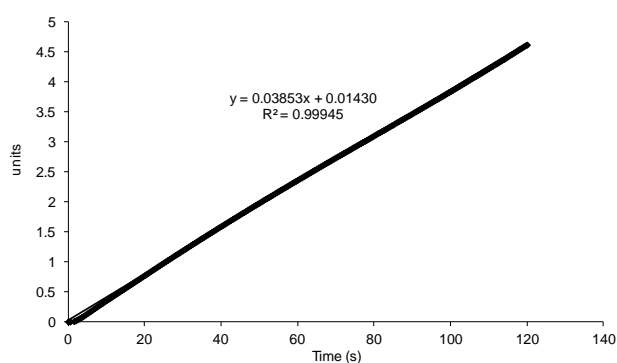

3,5-Difluorobenzaldehyde run 2

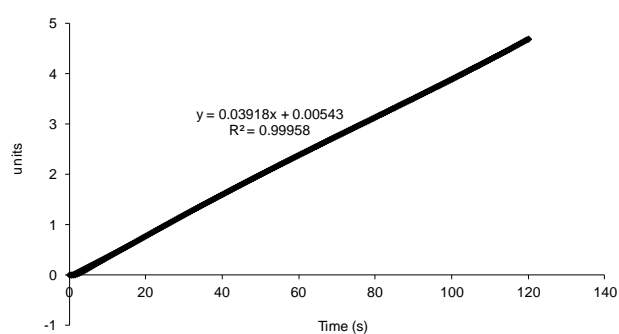

3-Chlorobenzaldehyde run 1

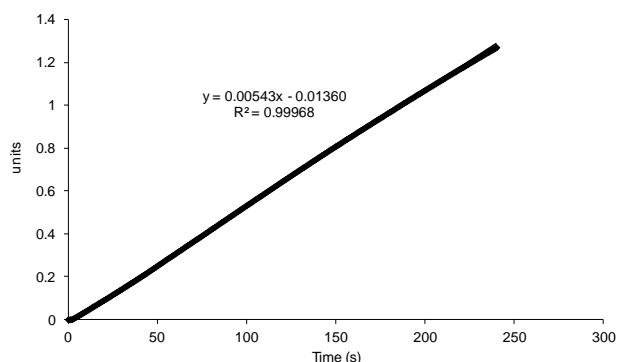

3-Chlorobenzaldehyde run 2

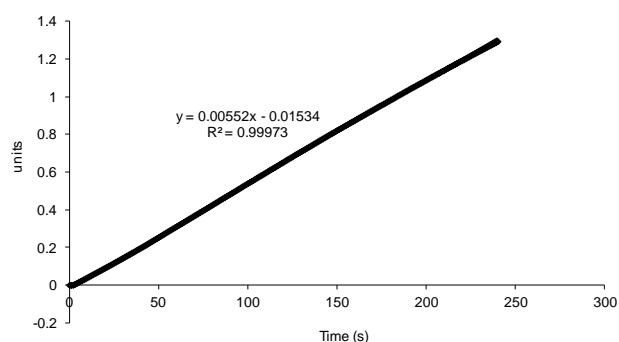

3-Fluorobenzaldehyde run 1

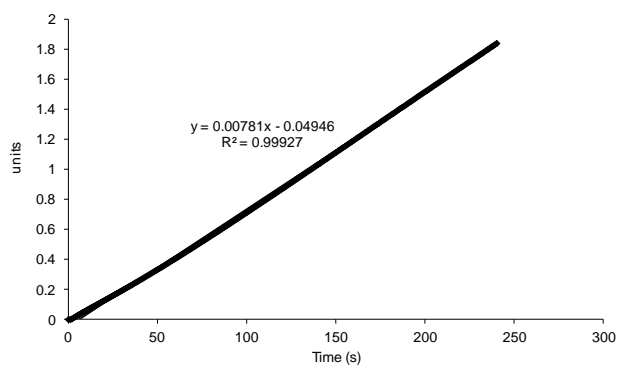

3-Fluorobenzaldehyde run 2

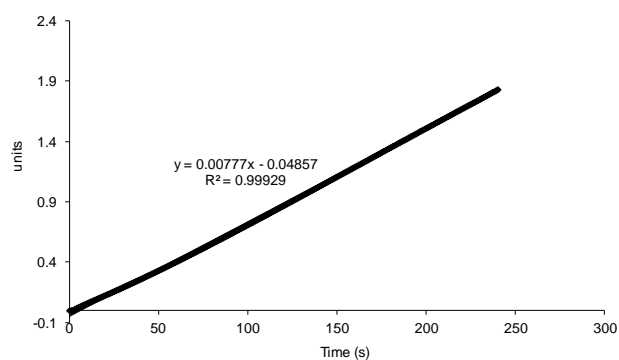

The units for the vertical scale are:  $\ln[(B_0A_t)/(B_tA_0)]/(A_0-B_0)$  where:  $A = [\text{PhCHO}]$ ,  $B = [\text{Me}_3\text{SiCN}]$  and the subscripts 0 and t refer to initial concentrations and concentrations at time t, respectively. The concentration of benzaldehyde was monitored.

4-Chlorobenzaldehyde run 1

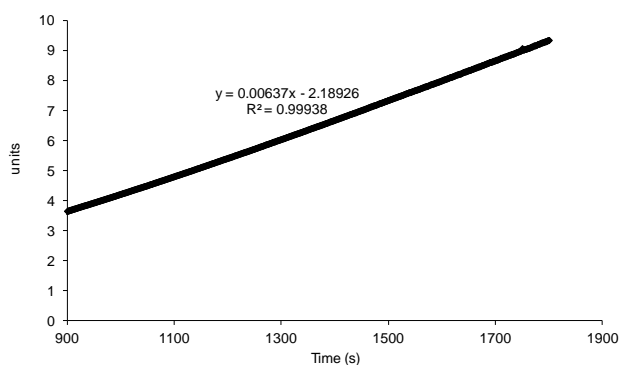

4-Chlorobenzaldehyde run 2

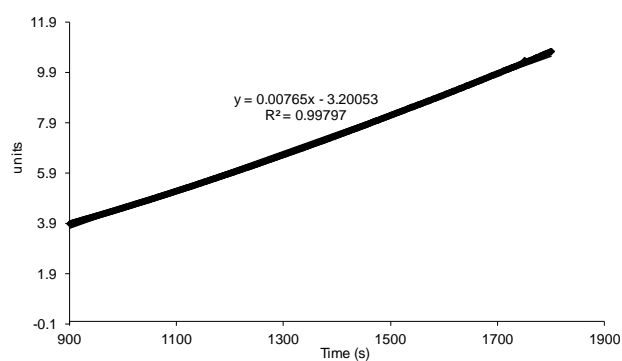

4-Fluorobenzaldehyde run 1

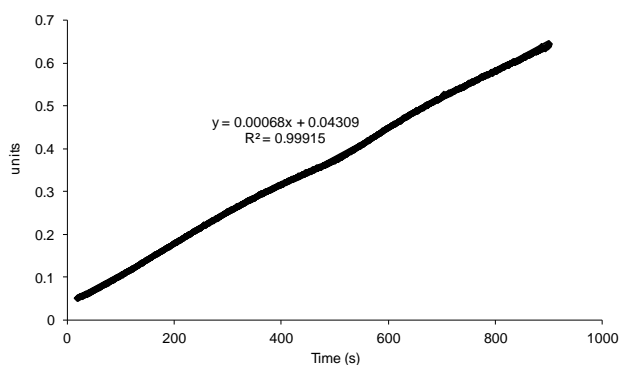

4-Fluorobenzaldehyde run 2

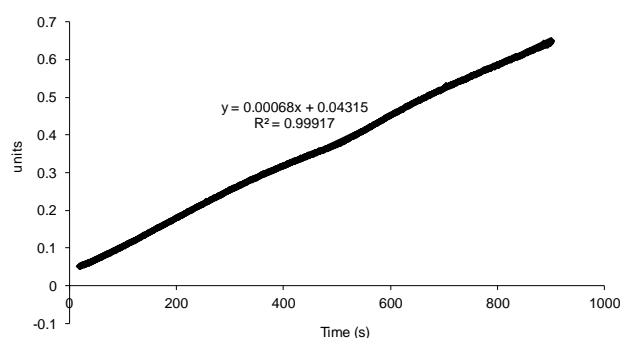

4-Thiomethylbenzaldehyde run 1

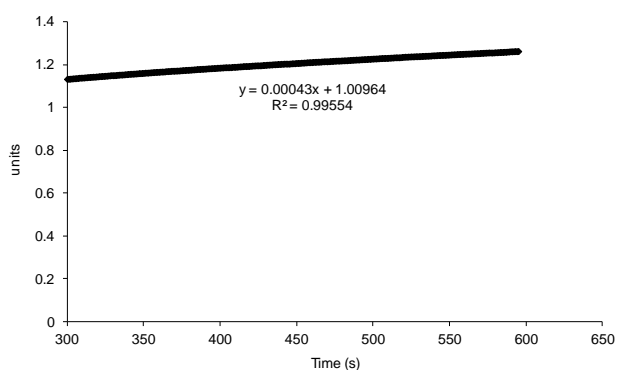

4-Thiomethylbenzaldehyde run 2

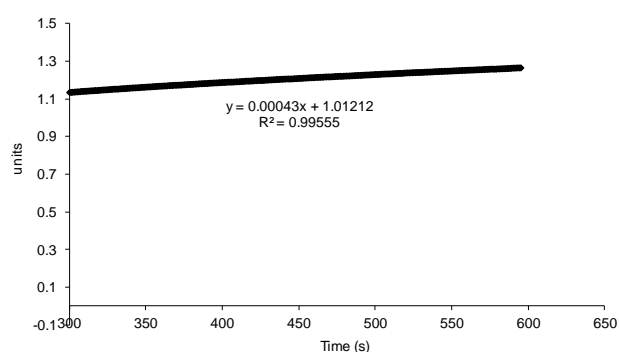

3-Methylbenzaldehyde run 1

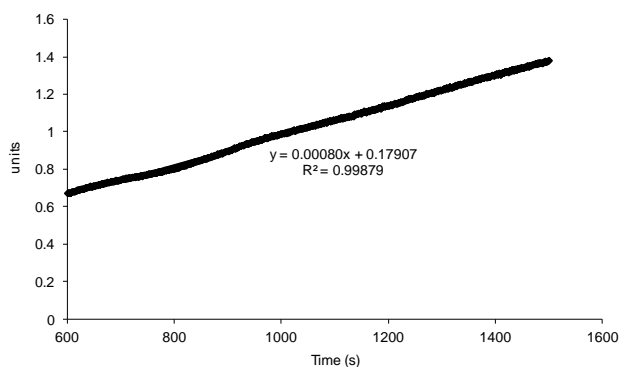

3-Methylbenzaldehyde run 2

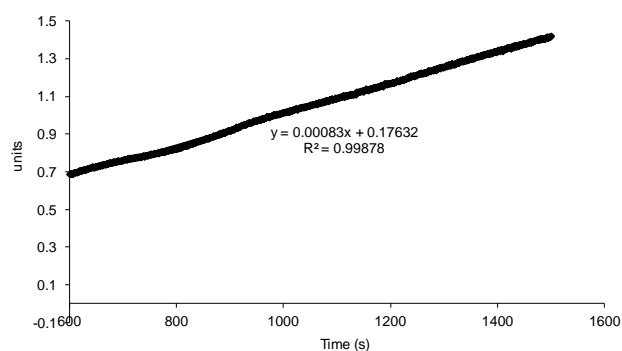

The units for the vertical scale are:  $\ln[(B_0A_t)/(B_tA_0)]/(A_0-B_0)$  where: A = [PhCHO], B = [Me<sub>3</sub>SiCN] and the subscripts 0 and t refer to initial concentrations and concentrations at time t, respectively. The concentration of benzaldehyde was monitored.

### Tabulated rate data for the Hammett plot in a stopped flow kinetics system

| aldehyde                                             | $\sigma$ | $k \text{ (M}^{-1}\text{s}^{-1}\text{)}^a$ |
|------------------------------------------------------|----------|--------------------------------------------|
| 3,5-F <sub>2</sub> C <sub>6</sub> H <sub>3</sub> CHO | 0.68     | $0.0388 \pm 0.0003$                        |
| 3-ClC <sub>6</sub> H <sub>4</sub> CHO                | 0.37     | $0.00543 \pm 0.00001$                      |
| 3-FC <sub>6</sub> H <sub>4</sub> CHO                 | 0.34     | $0.00779 \pm 0.00002$                      |
| 4-ClC <sub>6</sub> H <sub>4</sub> CHO                | 0.23     | $0.0070 \pm 0.0006$                        |
| 4-FC <sub>6</sub> H <sub>4</sub> CHO                 | 0.06     | $0.00068 \pm 0.00001$                      |
| PhCHO                                                | 0        | $0.00055 \pm 0.00001$                      |
| 4-MeSC <sub>6</sub> H <sub>4</sub> CHO               | 0        | $0.00043 \pm 0.00001$                      |
| 3-MeC <sub>6</sub> H <sub>4</sub> CHO                | -0.06    | $0.00082 \pm 0.00001$                      |

<sup>a</sup> Average of two experiments

### Hammett plot obtained using the stopped flow kinetics system

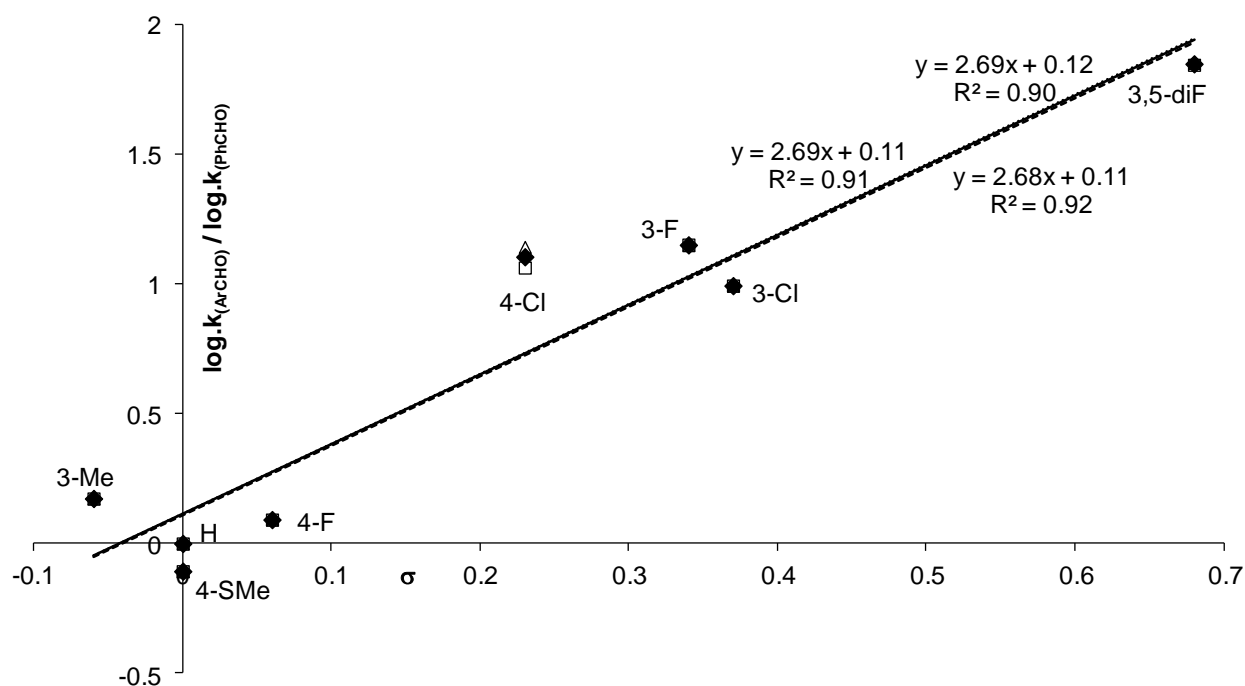

The filled diamonds and solid line correspond to the average rate data for each aldehyde whilst the unfilled squares and triangles and the broken lines correspond to each individual set of rate data.

### Kinetic plots used to construct the Eyring plots

#### Error analysis

To provide errors in the enthalpy and entropy of activation, the following approach was adopted.

1. Two solution of benzaldehyde in dichloromethane were prepared, one corresponding to the concentration of benzaldehyde at the start of the kinetics experiments and the other to 80% conversion (i.e. a concentration 20% of the first solution). Ten samples were removed from each of these solutions using the same microlitre syringe used for the kinetics study and each sample was analysed at the same wavelength, using the same UV spectrophotometer used for the kinetics work. The resulting data is presented graphically below and allowed the error in the measurement of the concentrations at the start and end of the kinetics experiments to be determined. On the basis of these data, an error of  $\pm 5\%$  was assumed in all data points in all variable temperature kinetics plots.

#### Benzaldehyde concentration corresponding to 0% conversion

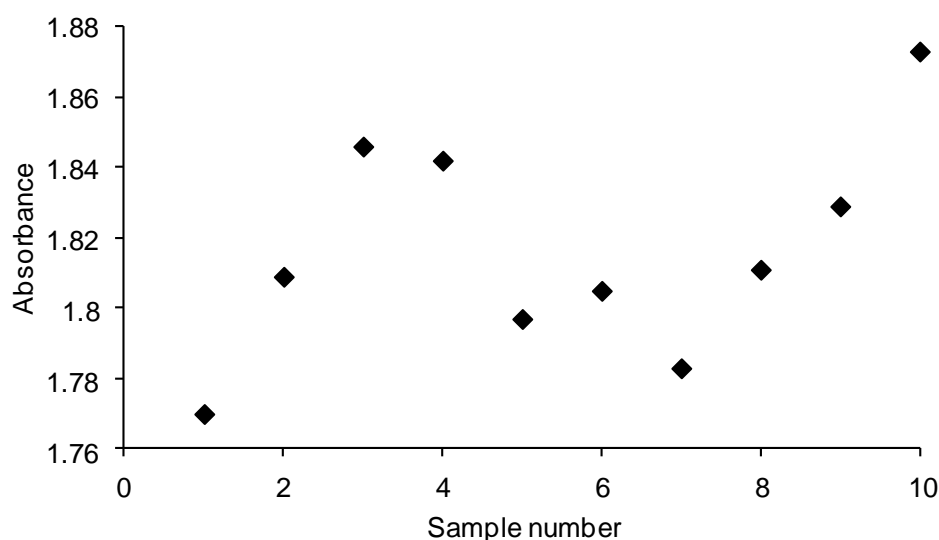

All of the data points lie within  $\pm 3.1\%$  of the mean value of 1.817

#### Benzaldehyde concentration corresponding to 80% conversion

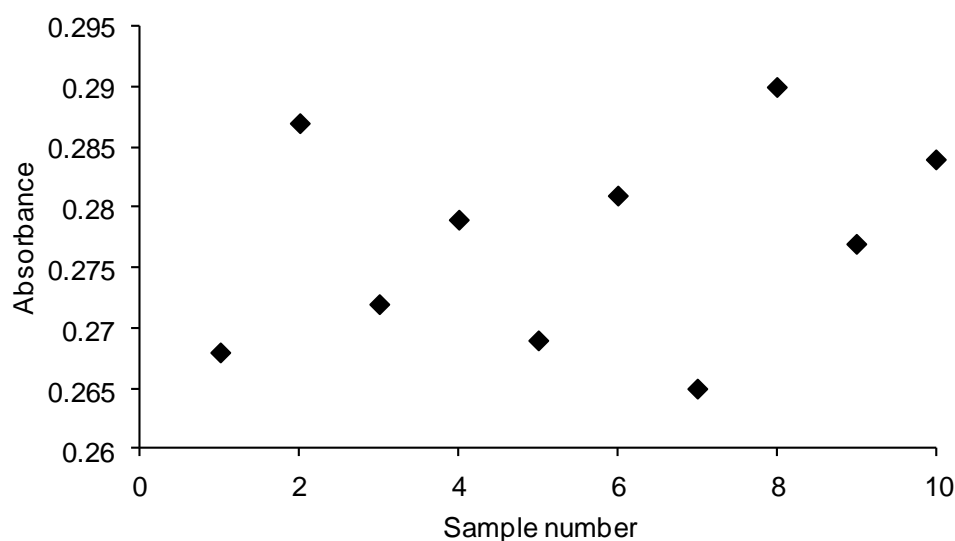

All of the data points lie within  $\pm 4.6\%$  of the mean value of 0.2772

2. For each variable temperature kinetics plot, in addition to determining the best fit line through the data, the lines corresponding to an error of  $\pm 5\%$  in the absorbance reading used to calculate the first and last data point were determined (these are shown on all the graphs in the following pages). These lines gave an indication of the error in the best fit line gradient.
3. Each variable temperature kinetics plot was conducted in duplicate, and the average of the two gradients was used to determine the data point for the Eyring plot. However, the error bars for this data point were determined from the maximum and minimum gradients of either individual kinetics plot.
4. The maximum and minimum slope passing through the highest and lowest temperature points were used to determine the errors in the gradient and intercept of the Eyring plot and hence the error limits in the enthalpy and entropy of activation.

## Addition of trimethylsilyl cyanide to benzaldehyde catalysed by Et<sub>3</sub>N 1 (2 mol%)

### Reaction at +10 °C run 1

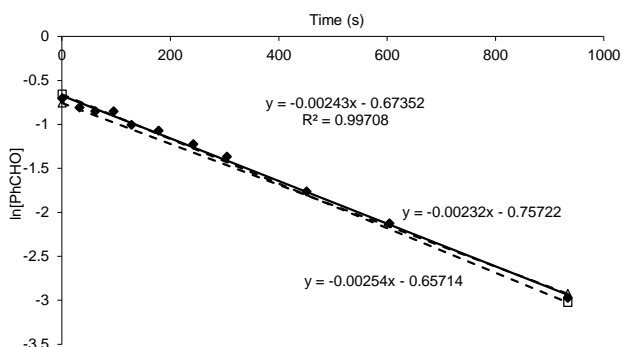

### Reaction at +10 °C run 2

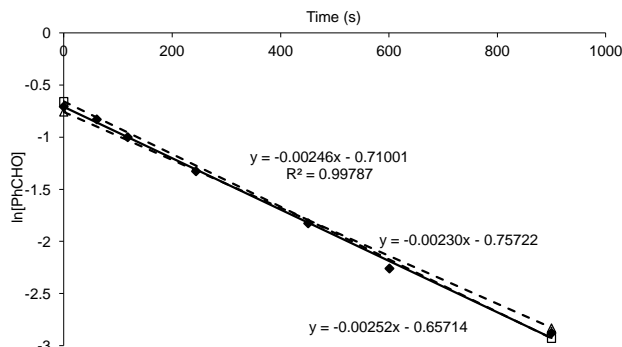

The solid line, filled diamonds and equation with  $R^2$  value correspond to the actual data and best fit line whilst the empty squares and diamonds, broken line and equations without  $R^2$  values correspond to a +/- 5% error applied to the absorbance of the first and last data points.

### Reaction at 0 °C run 1

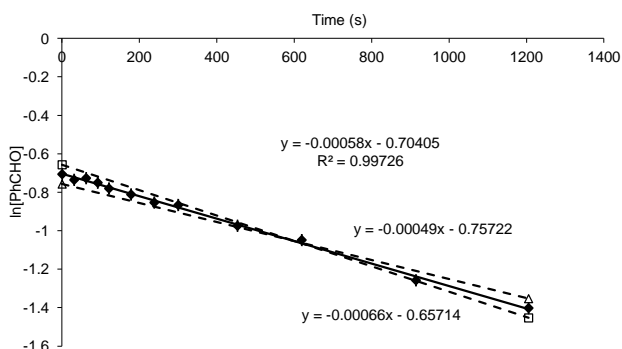

### Reaction at 0 °C run 2

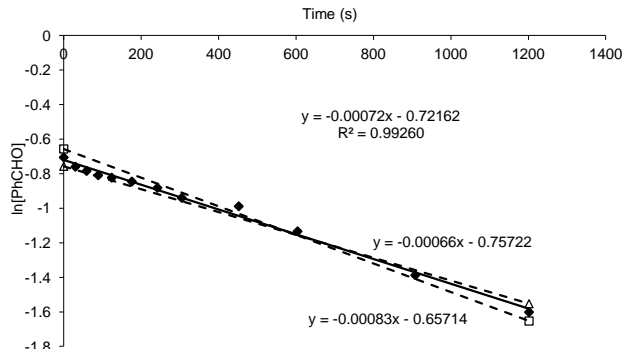

The solid line, filled diamonds and equation with  $R^2$  value correspond to the actual data and best fit line whilst the empty squares and diamonds, broken line and equations without  $R^2$  values correspond to a +/- 5% error applied to the absorbance of the first and last data points.

### Reaction at -10 °C run 1

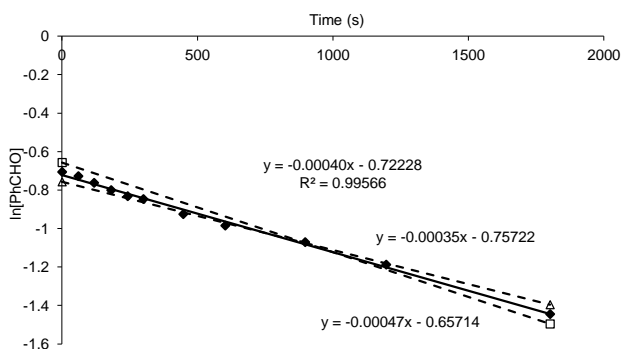

### Reaction at -10 °C run 2

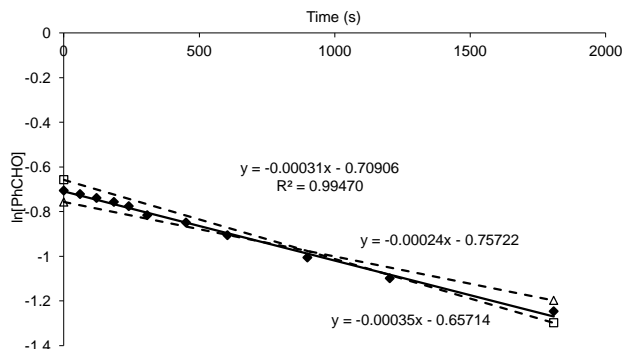

The solid line, filled diamonds and equation with  $R^2$  value correspond to the actual data and best fit line whilst the empty squares and diamonds, broken line and equations without  $R^2$  values correspond to a +/- 5% error applied to the absorbance of the first and last data points.

### Reaction at -20 °C run 1

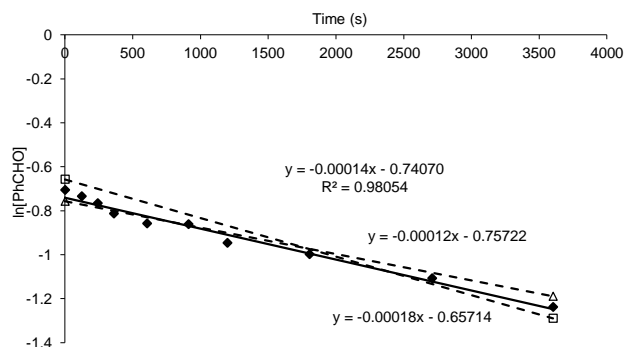

### Reaction at -20 °C run 2

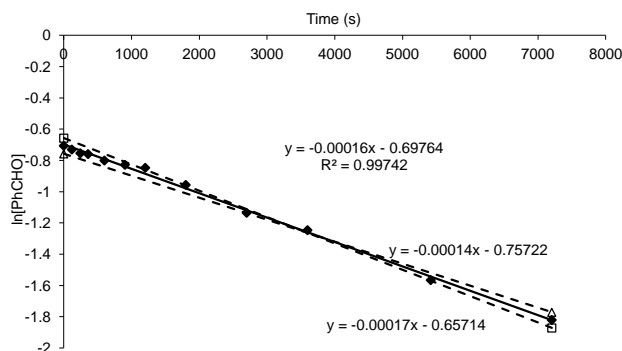

The solid line, filled diamonds and equation with  $R^2$  value correspond to the actual data and best fit line whilst the empty squares and diamonds, broken line and equations without  $R^2$  values correspond to a +/- 5% error applied to the absorbance of the first and last data points.

### Eyring plot

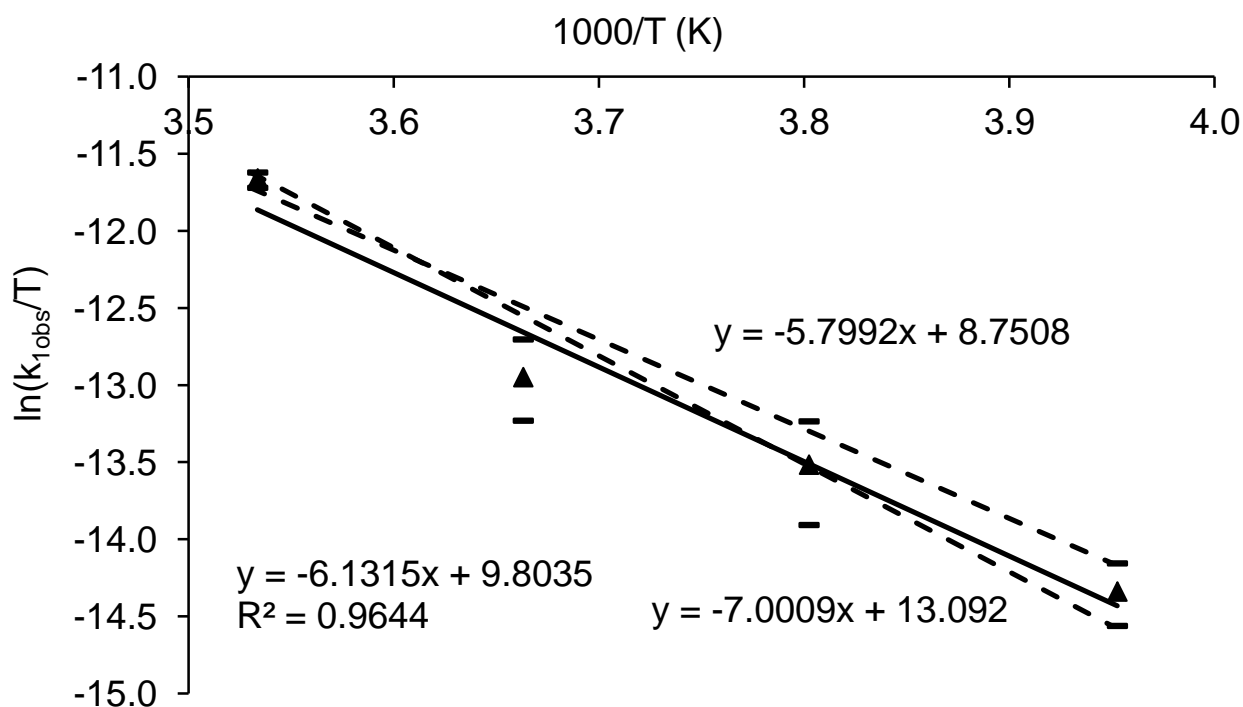

The filled triangles correspond to the average of the two individual rate measurements at each temperature and the solid line (and equation with  $R^2$  value) is the best fit line through these data points. This corresponds to the data given in Figure 4 of the manuscript. The horizontal lines above and below each diamond correspond to the maximum and minimum value for that data point from either of the individual rate measurements. The broken lines (and equations without  $R^2$  values) correspond to the limiting values for the best fit line based on the error limits for the highest and lowest temperature points. The data in Table 5 of the manuscript were obtained by averaging the maximum and minimum values of  $\Delta H^\ddagger$  and  $\Delta S^\ddagger$  obtained from the broken lines rather than from the solid line so as to ensure that the quoted values were at the midpoint of the maximum and minimum values.

## Addition of trimethylsilyl cyanide to benzaldehyde catalysed by Bu<sub>4</sub>NNCS 2 (1 mol%)

Reaction at +20 °C run 1

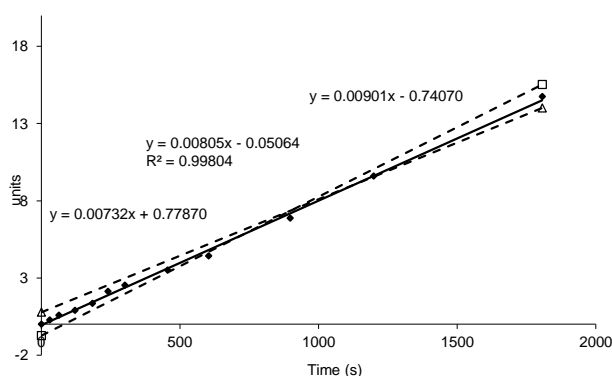

Reaction at +20 °C run 2

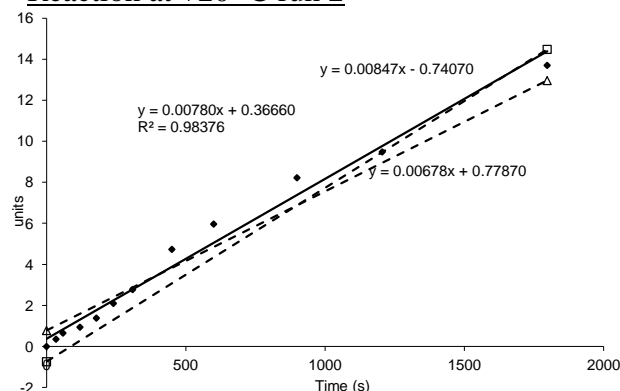

The solid line, filled diamonds and equation with  $R^2$  value correspond to the actual data and best fit line whilst the empty squares and diamonds, broken line and equations without  $R^2$  values correspond to a +/- 5% error applied to the absorbance of the first and last data points. The units for the vertical scale are:  $\ln[(B_0A_t)/(B_tA_0)]/(A_0-B_0)$  where: A = [PhCHO], B = [Me<sub>3</sub>SiCN] and the subscripts 0 and t refer to initial concentrations and concentrations at time t, respectively.

Reaction at +10 °C run 1

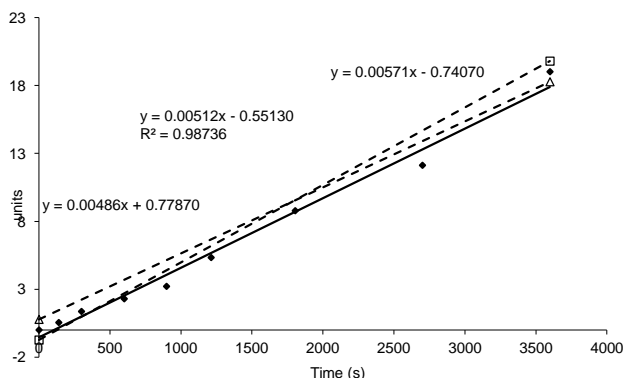

Reaction at +10 °C run 2

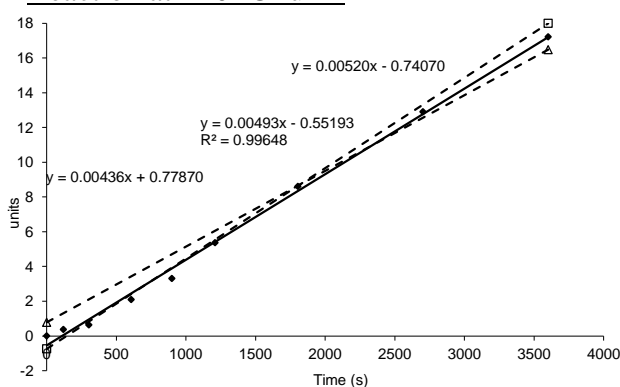

The solid line, filled diamonds and equation with  $R^2$  value correspond to the actual data and best fit line whilst the empty squares and diamonds, broken line and equations without  $R^2$  values correspond to a +/- 5% error applied to the absorbance of the first and last data points. The units for the vertical scale are:  $\ln[(B_0A_t)/(B_tA_0)]/(A_0-B_0)$  where: A = [PhCHO], B = [Me<sub>3</sub>SiCN] and the subscripts 0 and t refer to initial concentrations and concentrations at time t, respectively.



### Reaction at 0 °C run 1

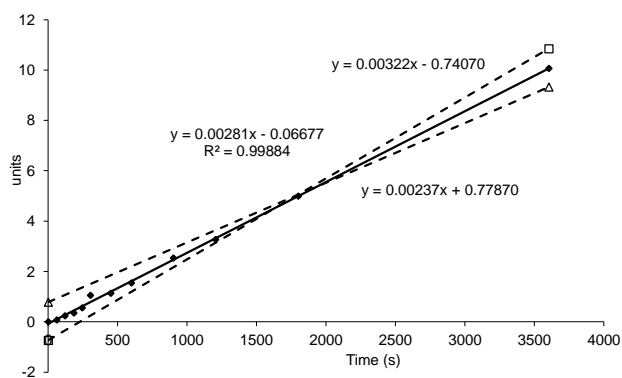

### Reaction at 0 °C run 2

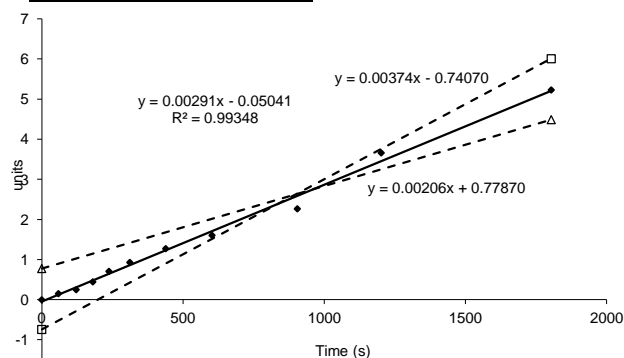

The solid line, filled diamonds and equation with  $R^2$  value correspond to the actual data and best fit line whilst the empty squares and diamonds, broken line and equations without  $R^2$  values correspond to a +/- 5% error applied to the absorbance of the first and last data points. The units for the vertical scale are:  $\ln[(B_0A_t)/(B_tA_0)]/(A_0-B_0)$  where: A = [PhCHO], B = [Me<sub>3</sub>SiCN] and the subscripts 0 and t refer to initial concentrations and concentrations at time t, respectively.

### Reaction at -10 °C run 1

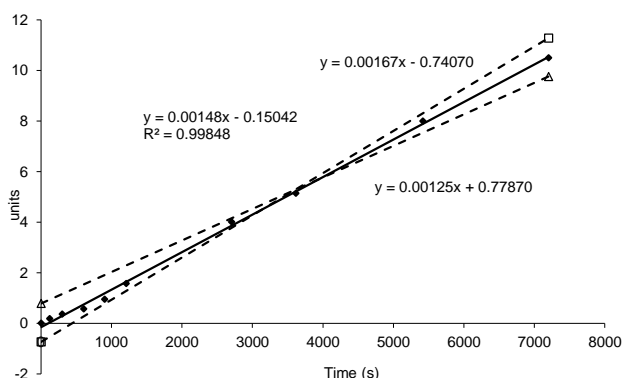

### Reaction at -10 °C run 2

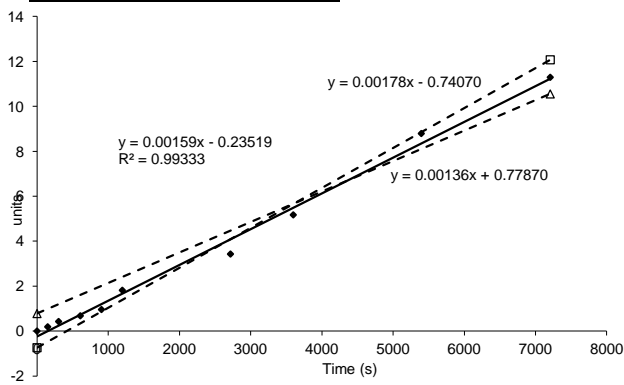

The solid line, filled diamonds and equation with  $R^2$  value correspond to the actual data and best fit line whilst the empty squares and diamonds, broken line and equations without  $R^2$  values correspond to a +/- 5% error applied to the absorbance of the first and last data points. The units for the vertical scale are:  $\ln[(B_0A_t)/(B_tA_0)]/(A_0-B_0)$  where: A = [PhCHO], B = [Me<sub>3</sub>SiCN] and the subscripts 0 and t refer to initial concentrations and concentrations at time t, respectively.

### Eyring plot

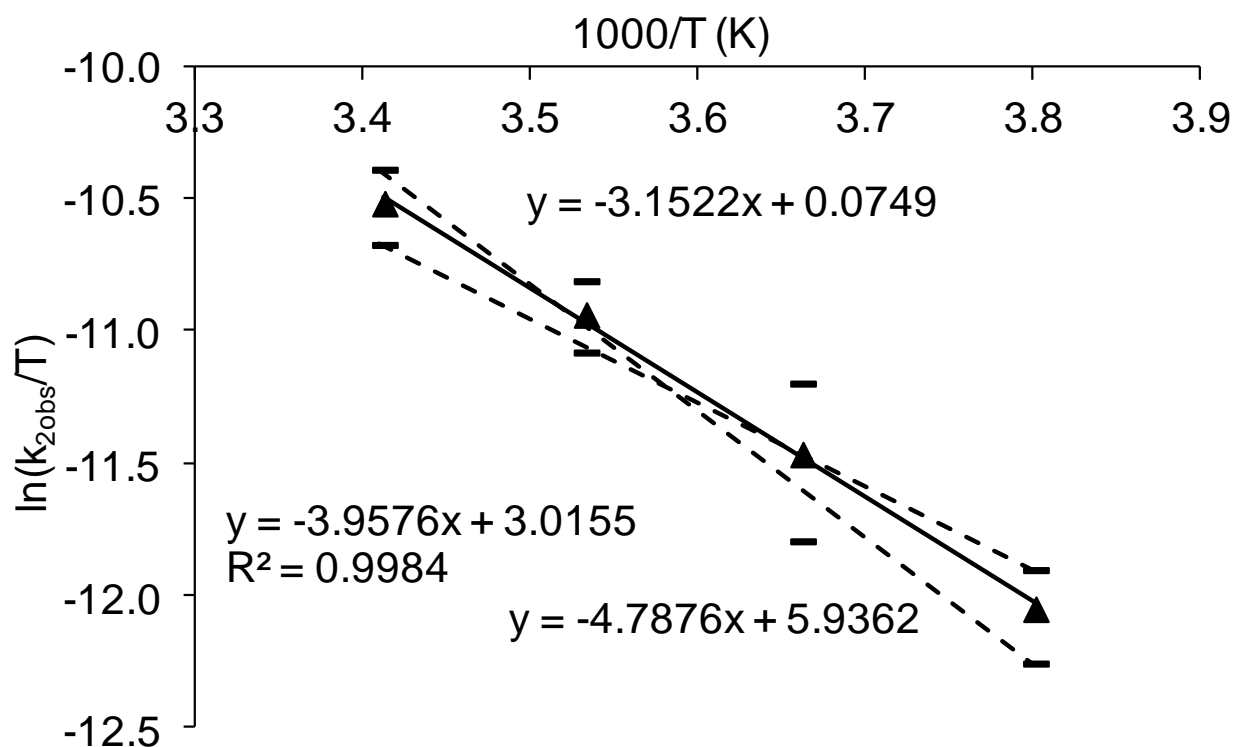

The filled triangles correspond to the average of the two individual rate measurements at each temperature and the solid line (and equation with  $R^2$  value) is the best fit line through these data points. This corresponds to the data given in Figure 4 of the manuscript. The horizontal lines above and below each diamond correspond to the maximum and minimum value for that data point from either of the individual rate measurements. The broken lines (and equations without  $R^2$  values) correspond to the limiting values for the best fit line based on the error limits for the highest and lowest temperature points. The data in Table 5 of the manuscript were obtained by averaging the maximum and minimum values of  $\Delta H^\ddagger$  and  $\Delta S^\ddagger$  obtained from the broken lines rather than from the solid line so as to ensure that the quoted values were at the midpoint of the maximum and minimum values.

## Addition of trimethylsilyl cyanide to benzaldehyde catalysed by Bu<sub>4</sub>NN<sub>3</sub> 3 (0.05 mol%)

### Reaction at +10 °C run 1

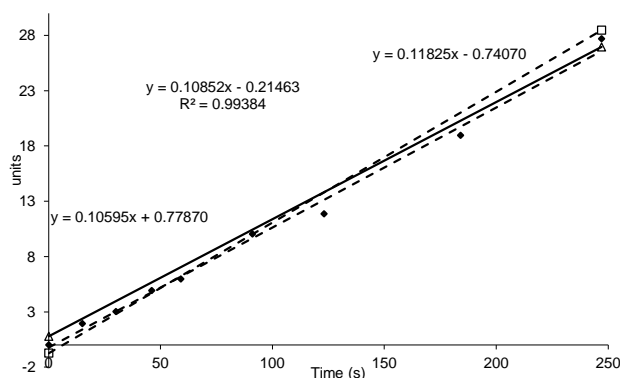

### Reaction at +10 °C run 2

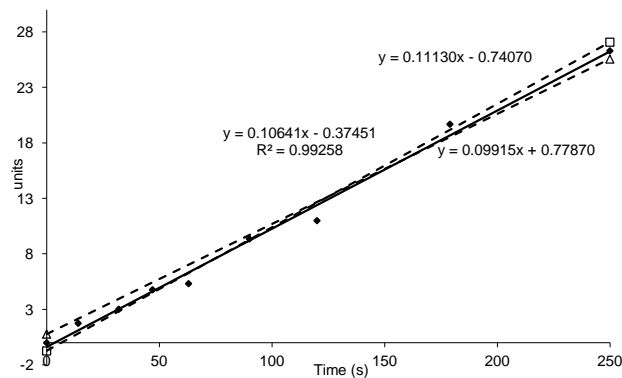

The solid line, filled diamonds and equation with  $R^2$  value correspond to the actual data and best fit line whilst the empty squares and diamonds, broken line and equations without  $R^2$  values correspond to a +/- 5% error applied to the absorbance of the first and last data points. The units for the vertical scale are:  $\ln[(B_0A_t)/(B_tA_0)]/(A_0-B_0)$  where: A = [PhCHO], B = [Me<sub>3</sub>SiCN] and the subscripts 0 and t refer to initial concentrations and concentrations at time t, respectively. The concentration of benzaldehyde was monitored.

### Reaction at 0 °C run 1

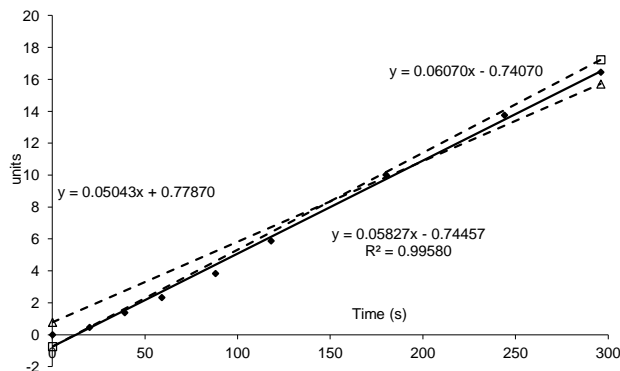

### Reaction at 0 °C run 2

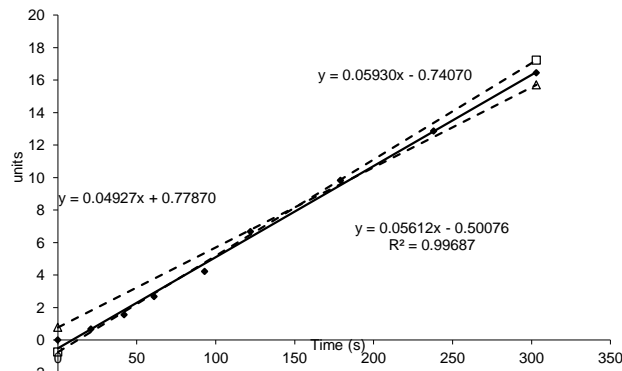

The solid line, filled diamonds and equation with  $R^2$  value correspond to the actual data and best fit line whilst the empty squares and diamonds, broken line and equations without  $R^2$  values correspond to a +/- 5% error applied to the absorbance of the first and last data points. The units for the vertical scale are:  $\ln[(B_0A_t)/(B_tA_0)]/(A_0-B_0)$  where: A = [PhCHO], B = [Me<sub>3</sub>SiCN] and the subscripts 0 and t refer to initial concentrations and concentrations at time t, respectively. The concentration of benzaldehyde was monitored.

### Reaction at -10 °C run 1

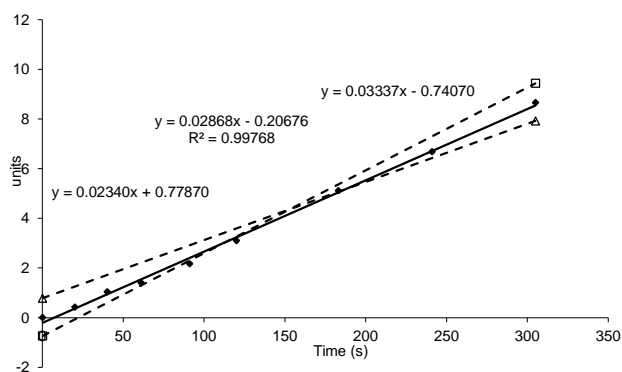

### Reaction at -10 °C run 2

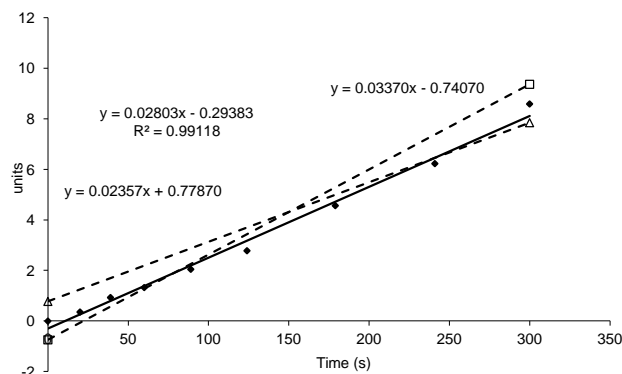

The solid line, filled diamonds and equation with  $R^2$  value correspond to the actual data and best fit line whilst the empty squares and diamonds, broken line and equations without  $R^2$  values correspond to a +/- 5% error applied to the absorbance of the first and last data points. The units for the vertical scale are:  $\ln[(B_0A_t)/(B_tA_0)]/(A_0-B_0)$  where: A = [PhCHO], B = [Me<sub>3</sub>SiCN] and the subscripts 0 and t refer to initial concentrations and concentrations at time t, respectively. The concentration of benzaldehyde was monitored.

### Reaction at -20 °C run 1

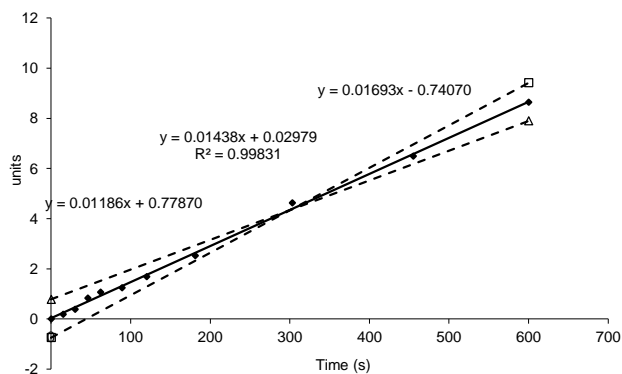

### Reaction at -20 °C run 2

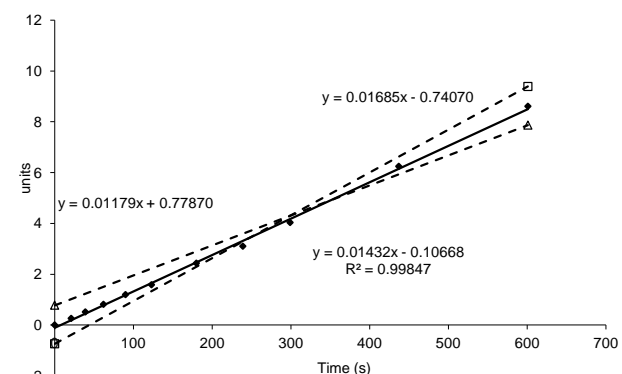

The solid line, filled diamonds and equation with  $R^2$  value correspond to the actual data and best fit line whilst the empty squares and diamonds, broken line and equations without  $R^2$  values correspond to a +/- 5% error applied to the absorbance of the first and last data points. The units for the vertical scale are:  $\ln[(B_0A_t)/(B_tA_0)]/(A_0-B_0)$  where: A = [PhCHO], B = [Me<sub>3</sub>SiCN] and the subscripts 0 and t refer to initial concentrations and concentrations at time t, respectively. The concentration of benzaldehyde was monitored.

### Eyring plot

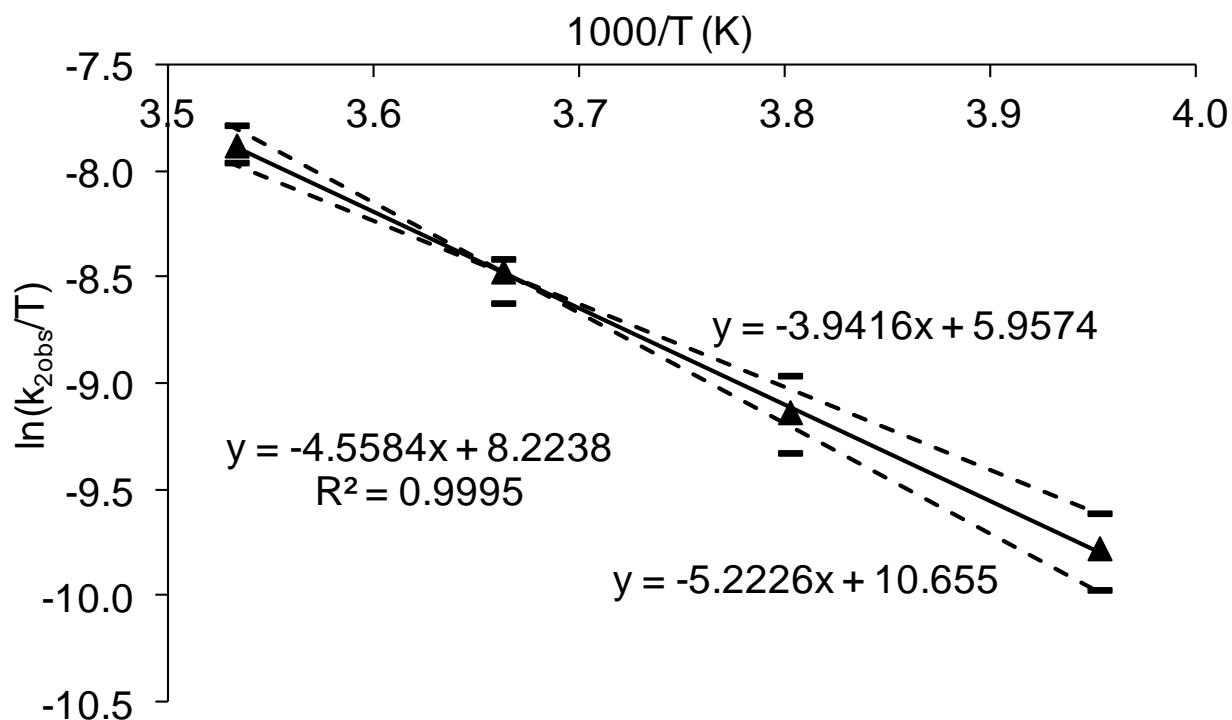

The filled triangles correspond to the average of the two individual rate measurements at each temperature and the solid line (and equation with  $R^2$  value) is the best fit line through these data points. This corresponds to the data given in Figure 4 of the manuscript. The horizontal lines above and below each diamond correspond to the maximum and minimum value for that data point from either of the individual rate measurements. The broken lines (and equations without  $R^2$  values) correspond to the limiting values for the best fit line based on the error limits for the highest and lowest temperature points. The data in Table 5 of the manuscript were obtained by averaging the maximum and minimum values of  $\Delta H^\ddagger$  and  $\Delta S^\ddagger$  obtained from the broken lines rather than from the solid line so as to ensure that the quoted values were at the midpoint of the maximum and minimum values.

## Addition of trimethylsilyl cyanide to benzaldehyde catalysed by Bu<sub>4</sub>NCN 4 (0.005 mol%)

### Reaction at +20 °C run 1

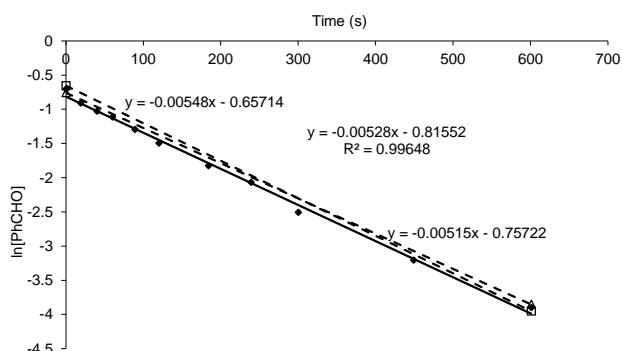

### Reaction at +20 °C run 2

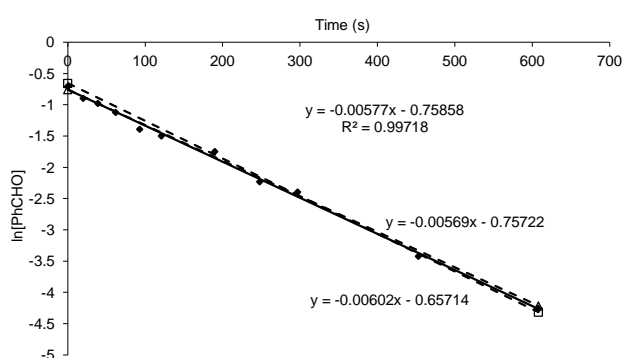

The solid line, filled diamonds and equation with  $R^2$  value correspond to the actual data and best fit line whilst the empty squares and diamonds, broken line and equations without  $R^2$  values correspond to a +/- 5% error applied to the absorbance of the first and last data points.

### Reaction at +10 °C run 1

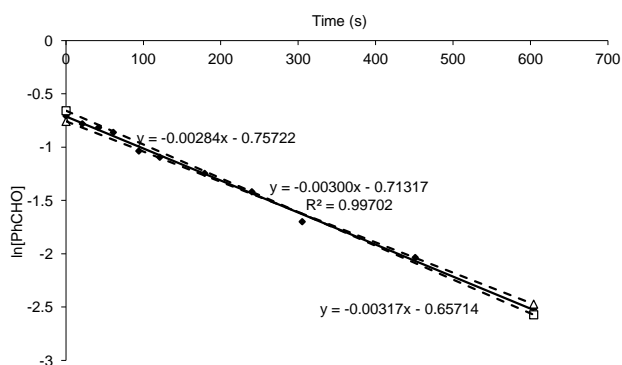

### Reaction at +10 °C run 2

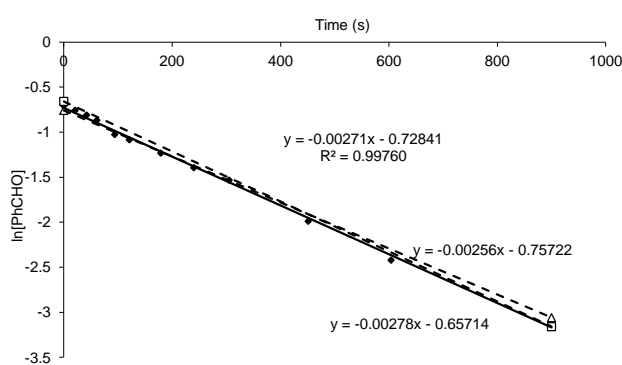

The solid line, filled diamonds and equation with  $R^2$  value correspond to the actual data and best fit line whilst the empty squares and diamonds, broken line and equations without  $R^2$  values correspond to a +/- 5% error applied to the absorbance of the first and last data points.

### Reaction at 0 °C run 1

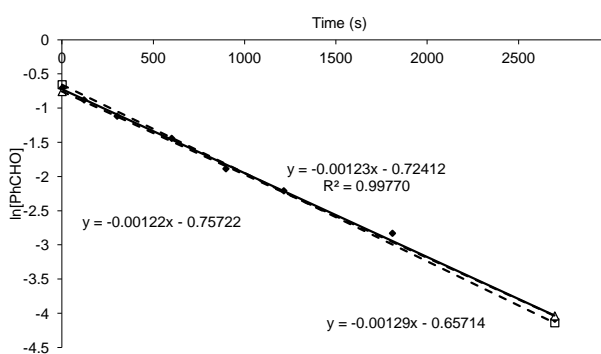

### Reaction at 0 °C run 2

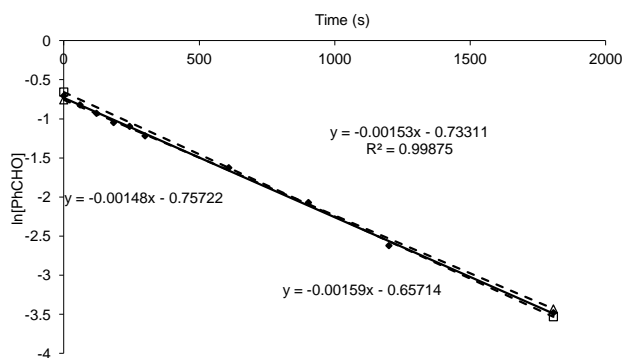

The solid line, filled diamonds and equation with  $R^2$  value correspond to the actual data and best fit line whilst the empty squares and diamonds, broken line and equations without  $R^2$  values correspond to a +/- 5% error applied to the absorbance of the first and last data points.

### Reaction at -10 °C run 1

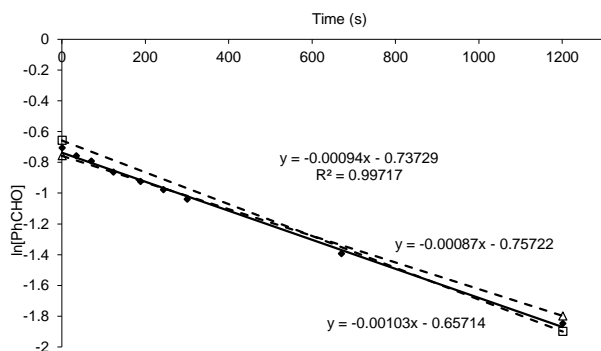

### Reaction at -10 °C run 2

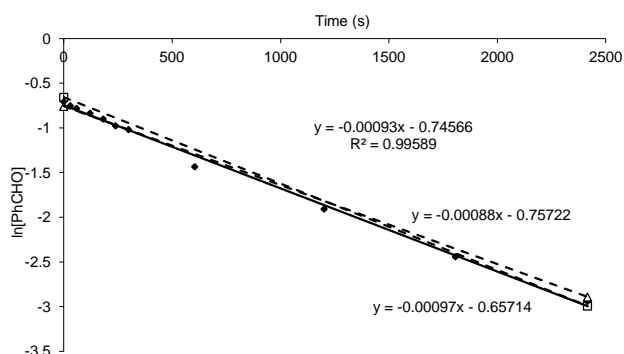

The solid line, filled diamonds and equation with  $R^2$  value correspond to the actual data and best fit line whilst the empty squares and diamonds, broken line and equations without  $R^2$  values correspond to a +/- 5% error applied to the absorbance of the first and last data points.

### Reaction at -20 °C run 1

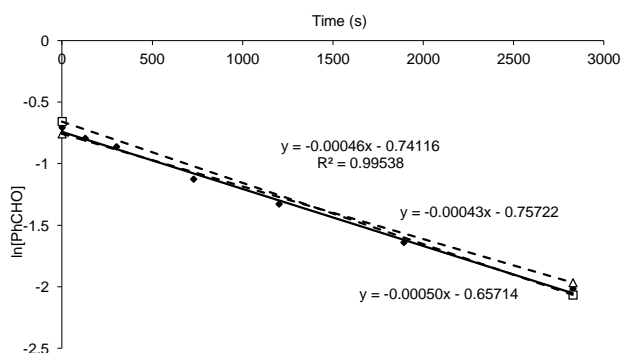

### Reaction at -20 °C run 2

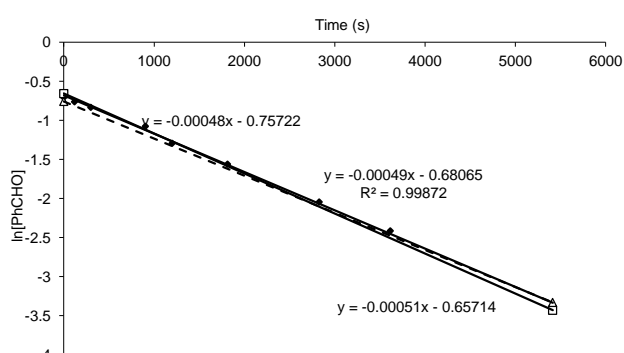

The solid line, filled diamonds and equation with  $R^2$  value correspond to the actual data and best fit line whilst the empty squares and diamonds, broken line and equations without  $R^2$  values correspond to a +/- 5% error applied to the absorbance of the first and last data points.

# Eyring plot

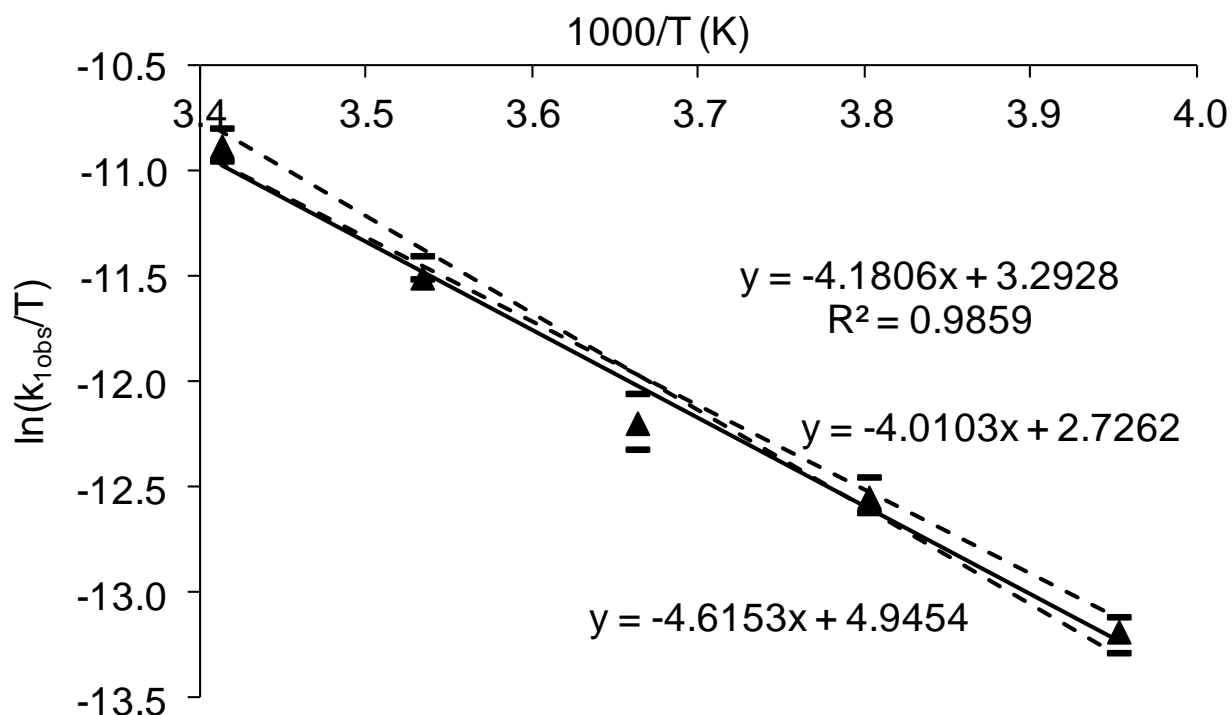

The filled triangles correspond to the average of the two individual rate measurements at each temperature and the solid line (and equation with  $R^2$  value) is the best fit line through these data points. This corresponds to the data given in Figure 4 of the manuscript. The horizontal lines above and below each diamond correspond to the maximum and minimum value for that data point from either of the individual rate measurements. The broken lines (and equations without  $R^2$  values) correspond to the limiting values for the best fit line based on the error limits for the highest and lowest temperature points. The data in Table 5 of the manuscript were obtained by averaging the maximum and minimum values of  $\Delta H^\ddagger$  and  $\Delta S^\ddagger$  obtained from the broken lines rather than from the solid line so as to ensure that the quoted values were at the midpoint of the maximum and minimum values.



## NMR stacked plots to investigate the formation of hypervalent silicon species

### Addition of Et<sub>3</sub>N 1 to trimethylsilyl cyanide

#### <sup>1</sup>H NMR spectra

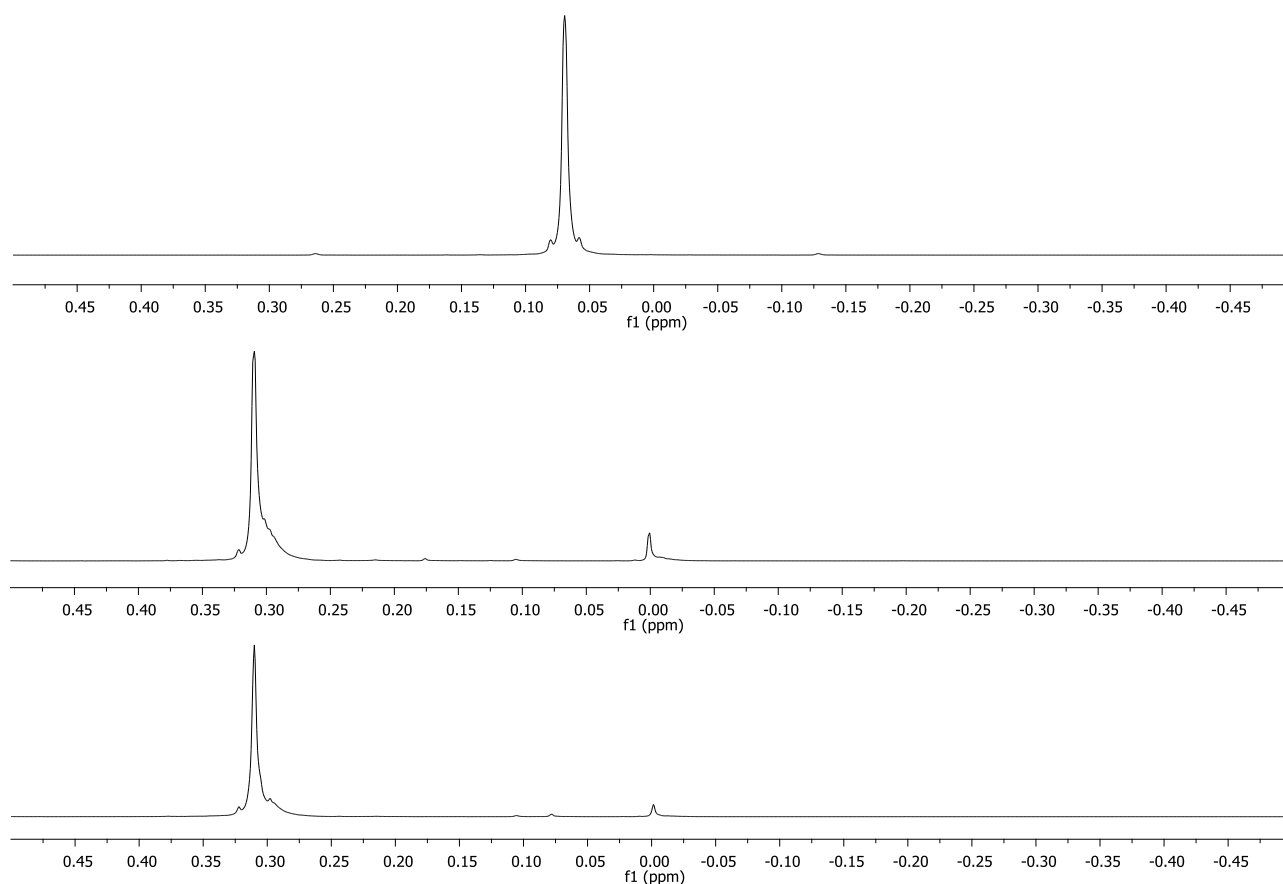

Bottom: <sup>1</sup>H NMR spectrum of Me<sub>3</sub>SiCN.

Middle: <sup>1</sup>H NMR spectrum of a 1:1 mixture of Me<sub>3</sub>SiCN and Et<sub>3</sub>N showing no change in the position of the Me<sub>3</sub>SiCN signal and no new signals corresponding to the Me<sub>3</sub>Si groups of other silicon containing species.

Top: <sup>1</sup>H NMR spectrum of (Me<sub>3</sub>Si)<sub>2</sub>O

$^{13}\text{C}$  NMR spectra

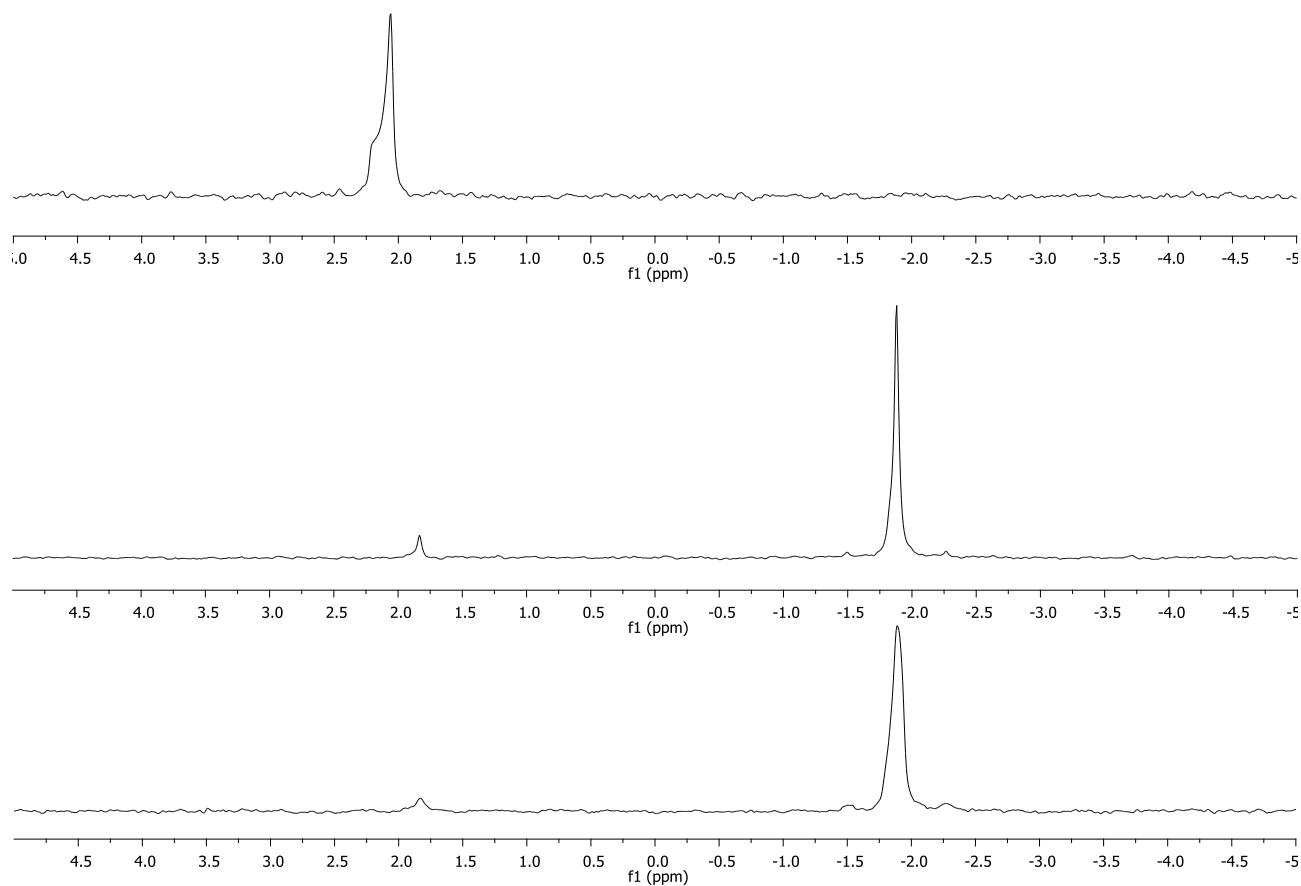

Bottom:  $^{13}\text{C}$  NMR spectrum of  $\text{Me}_3\text{SiCN}$ .

Middle:  $^{13}\text{C}$  NMR spectrum of a 1:1 mixture of  $\text{Me}_3\text{SiCN}$  and  $\text{Et}_3\text{N}$  showing no change in the position of the  $\text{Me}_3\text{SiCN}$  signal.

Top:  $^{13}\text{C}$  NMR spectrum of  $(\text{Me}_3\text{Si})_2\text{O}$

The small signal at 1.8 ppm in both spectra is consistent with the presence of a hypervalent silicon species  $\text{H}^+ [\text{Me}_3\text{Si}(\text{CN})(\text{X})]^-$  where  $\text{X} = \text{OH}$  or  $\text{CN}$  due to partial hydrolysis of  $\text{Me}_3\text{SiCN}$  by adventitious moisture.

## Addition of Bu<sub>4</sub>NNCS 2 to trimethylsilyl cyanide

### <sup>1</sup>H NMR spectra

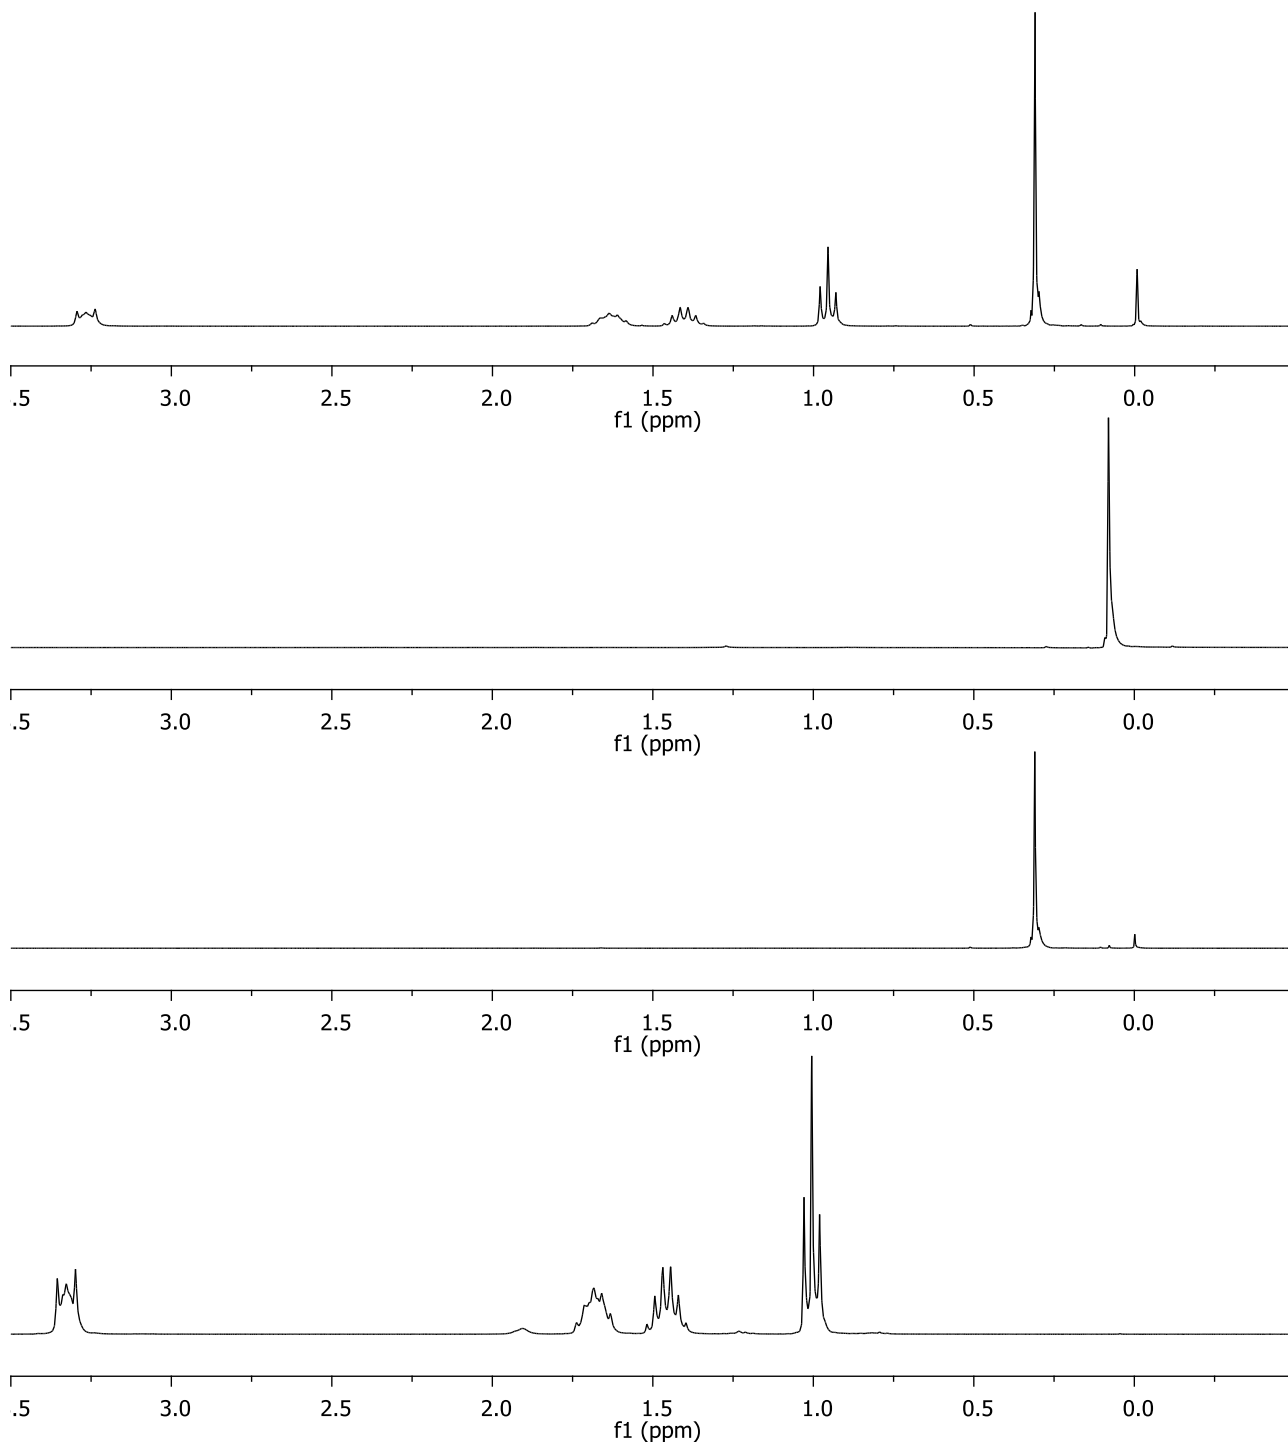

Bottom: <sup>1</sup>H NMR spectrum of Bu<sub>4</sub>NNCS.

Next to bottom: <sup>1</sup>H NMR spectrum of Me<sub>3</sub>SiCN.

Next to top: <sup>1</sup>H NMR spectrum of Me<sub>3</sub>SiNCS.

Top: <sup>1</sup>H NMR spectrum of a 1:1 mixture of Me<sub>3</sub>SiCN and Bu<sub>4</sub>NNCS showing the presence of a new signal at -0.01 ppm consistent with the hypervalent silicon species Bu<sub>4</sub>N<sup>+</sup> [Me<sub>3</sub>Si(CN)(NCS)]<sup>-</sup>.

# $^{13}\text{C}$ NMR spectra

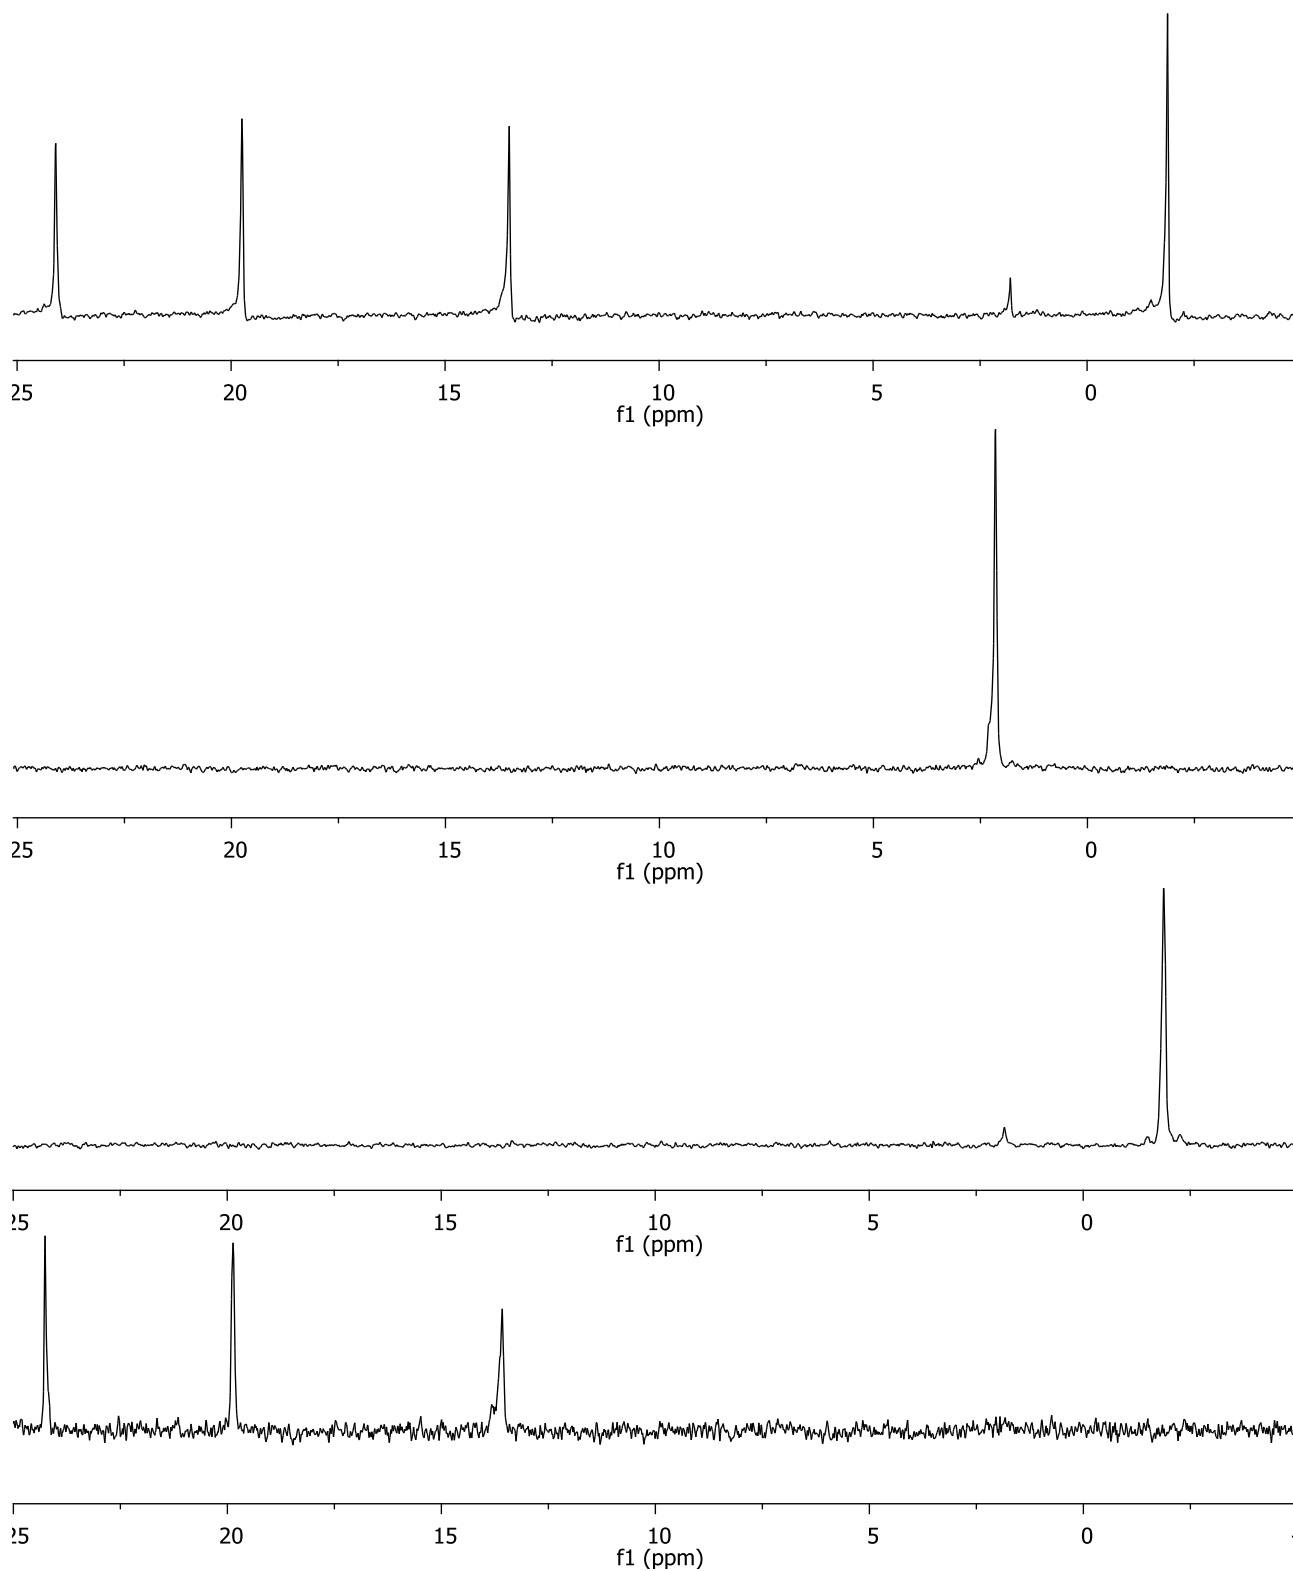

Bottom:  $^{13}\text{C}$  NMR spectrum of  $\text{Bu}_4\text{NNCS}$ .

Next to bottom:  $^{13}\text{C}$  NMR spectrum of  $\text{Me}_3\text{SiCN}$ .

Next to top:  $^{13}\text{C}$  NMR spectrum of  $\text{Me}_3\text{SiNCS}$ .

Top:  $^{13}\text{C}$  NMR spectrum of a 1:1 mixture of  $\text{Me}_3\text{SiCN}$  and  $\text{Bu}_4\text{NNCS}$  showing the presence of a new signal at +1.80 ppm consistent with the hypervalent silicon species  $\text{Bu}_4\text{N}^+ [\text{Me}_3\text{Si}(\text{CN})(\text{NCS})]^-$ .

## Addition of Bu<sub>4</sub>NN<sub>3</sub> 3 to trimethylsilyl cyanide

### <sup>1</sup>H NMR spectra

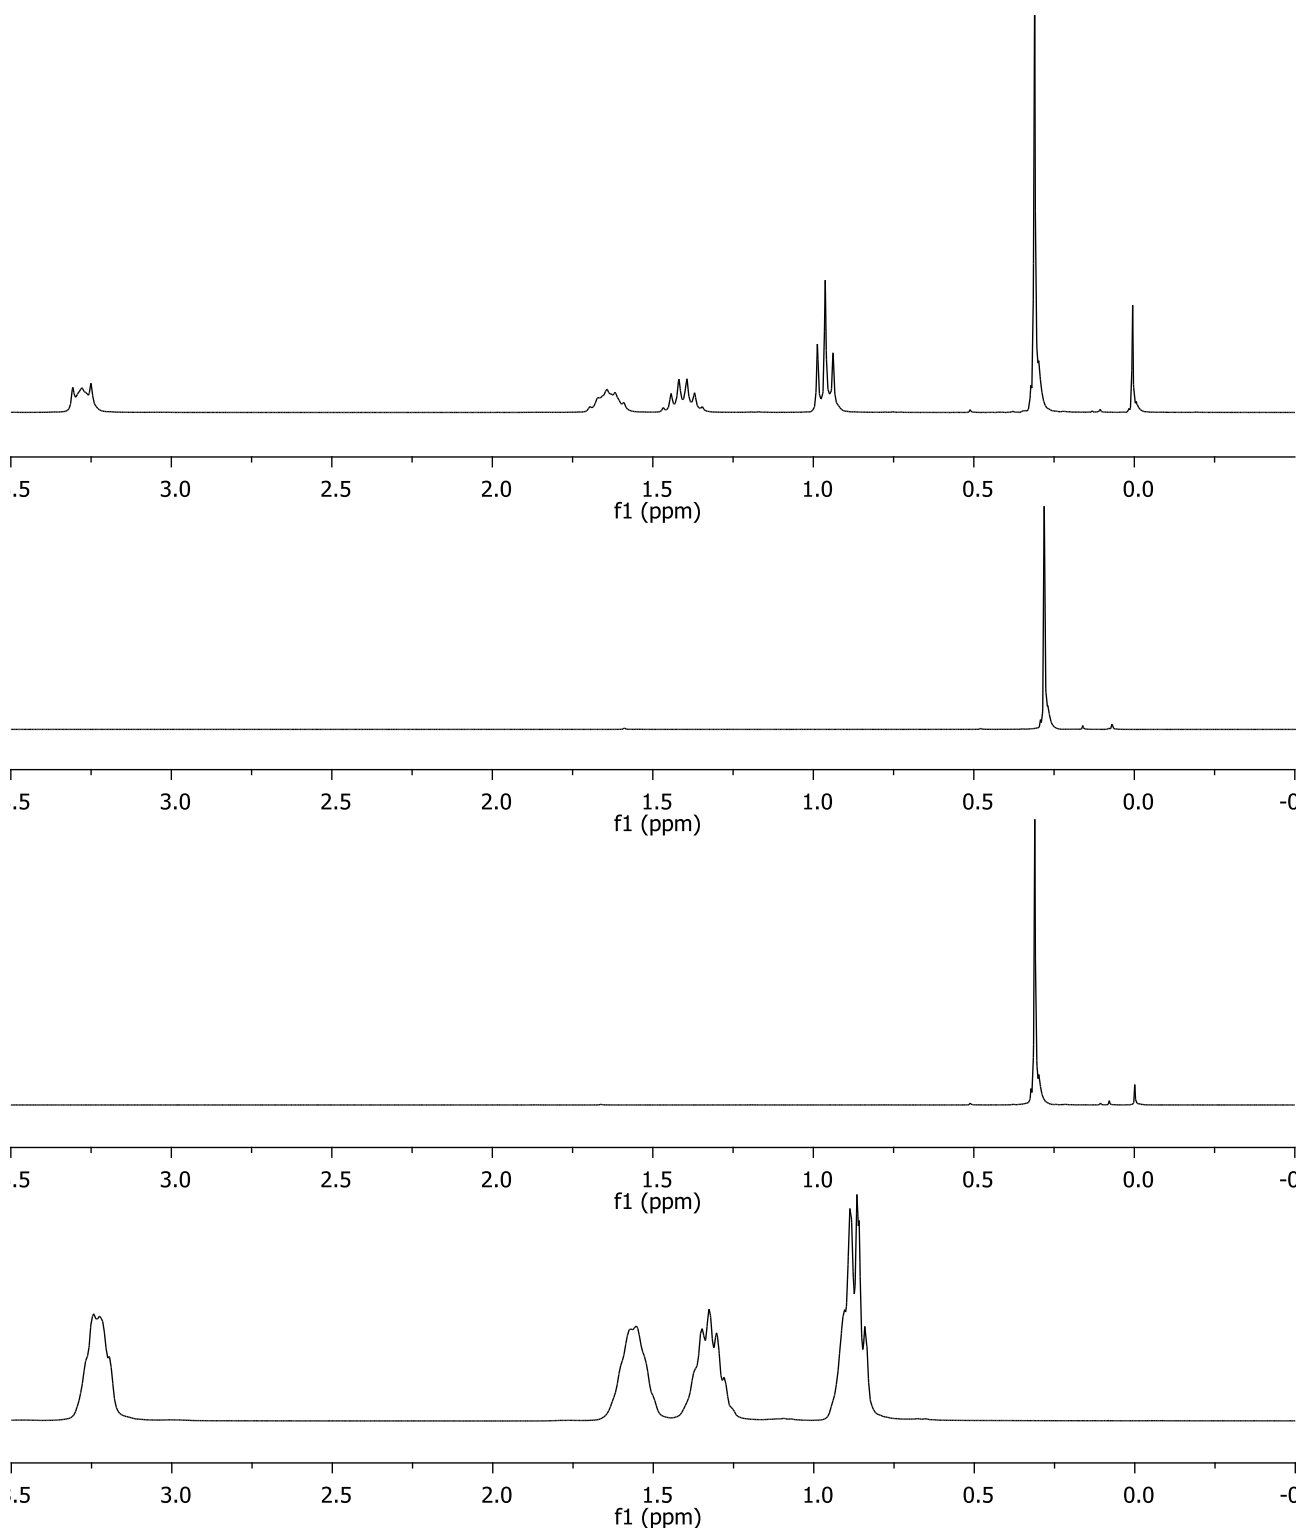

Bottom: <sup>1</sup>H NMR spectrum of Bu<sub>4</sub>NN<sub>3</sub>.

Next to bottom: <sup>1</sup>H NMR spectrum of Me<sub>3</sub>SiCN.

Next to top: <sup>1</sup>H NMR spectrum of Me<sub>3</sub>SiN<sub>3</sub>.

Top: <sup>1</sup>H NMR spectrum of a 1:1 mixture of Me<sub>3</sub>SiCN and Bu<sub>4</sub>NN<sub>3</sub> showing the presence of a new signal at +0.01 ppm consistent with the hypervalent silicon species Bu<sub>4</sub>N<sup>+</sup> [Me<sub>3</sub>Si(CN)(N<sub>3</sub>)]<sup>-</sup>.

$^{13}\text{C}$  NMR spectra

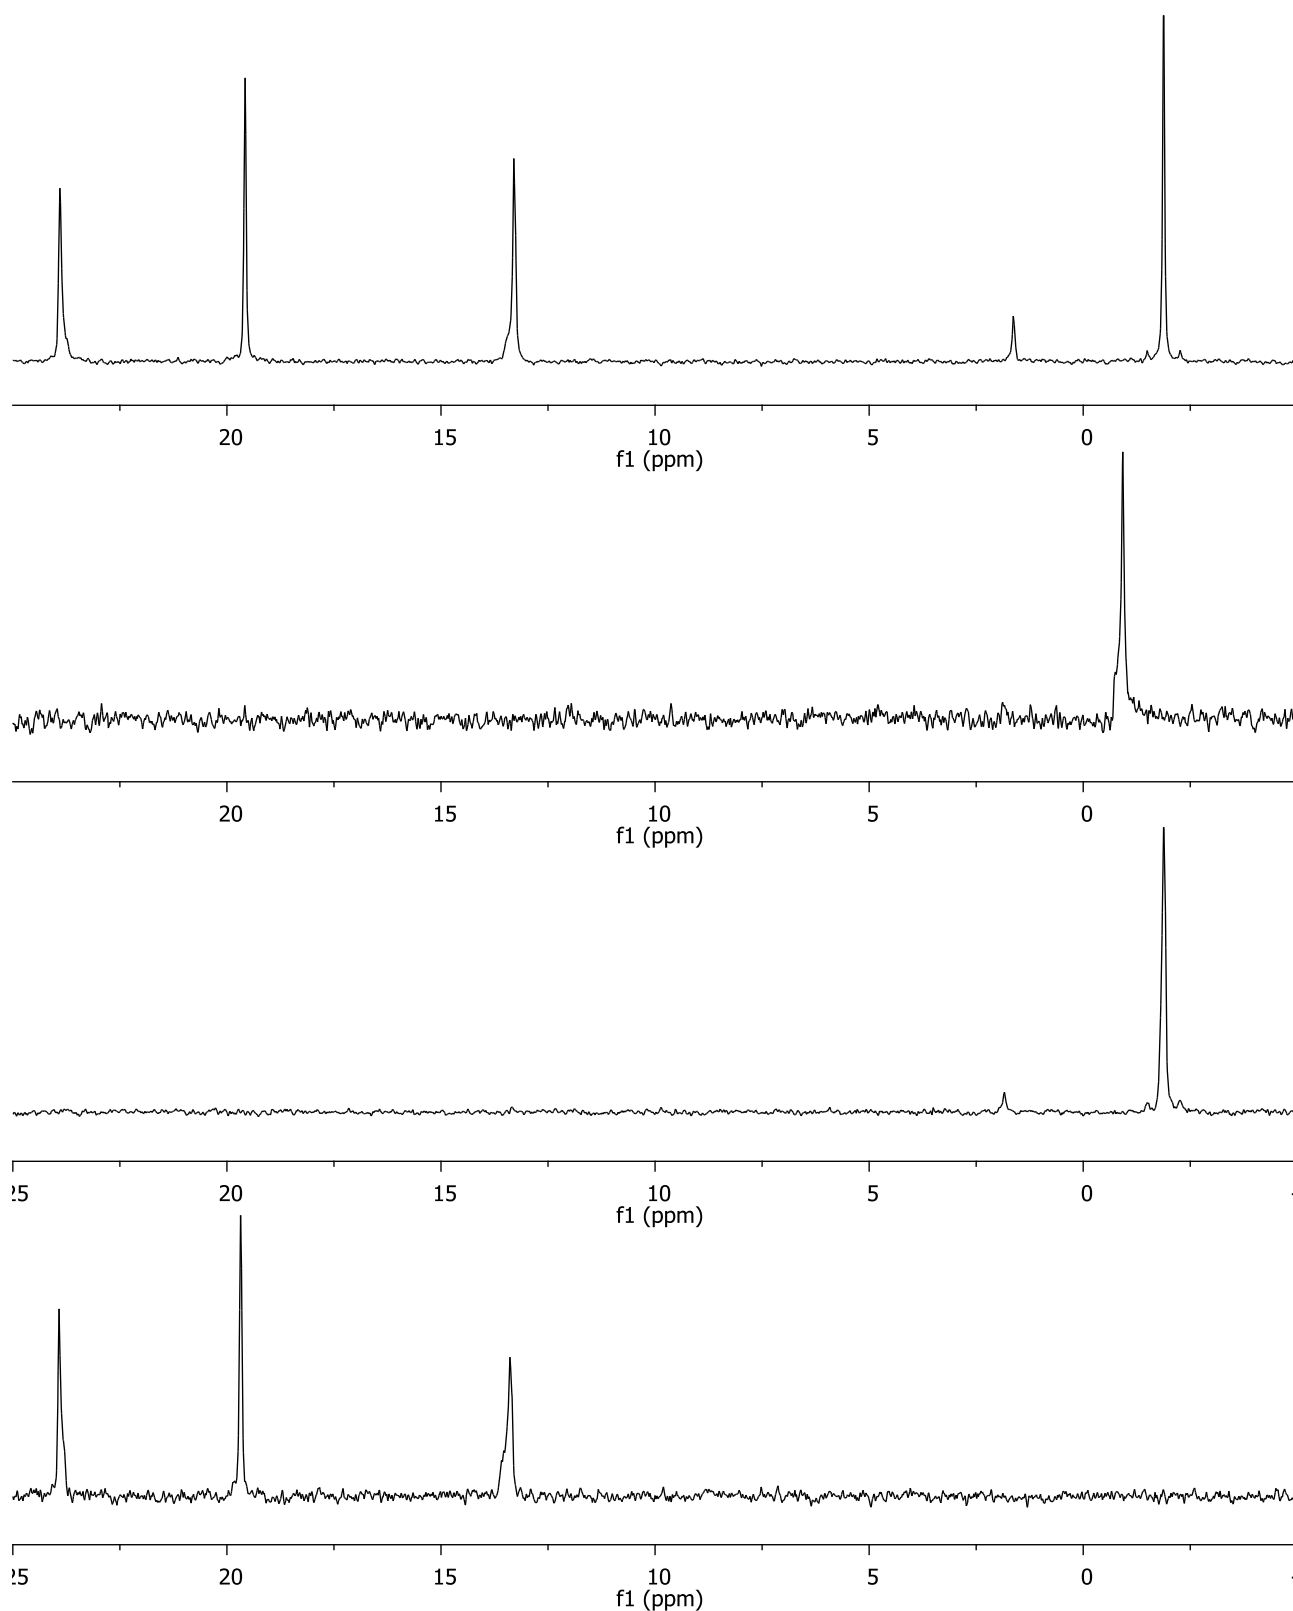

Bottom:  $^{13}\text{C}$  NMR spectrum of  $\text{Bu}_4\text{NN}_3$ .

Next to bottom:  $^{13}\text{C}$  NMR spectrum of  $\text{Me}_3\text{SiCN}$ .

Next to top:  $^{13}\text{C}$  NMR spectrum of  $\text{Me}_3\text{SiN}_3$ .

Top:  $^{13}\text{C}$  NMR spectrum of a 1:1 mixture of  $\text{Me}_3\text{SiCN}$  and  $\text{Bu}_4\text{NN}_3$  showing the presence of a new signal at +1.64 ppm consistent with the hypervalent silicon species  $\text{Bu}_4\text{N}^+ [\text{Me}_3\text{Si}(\text{CN})(\text{N}_3)]^-$ .

## Addition of Bu<sub>4</sub>NCN 4 to trimethylsilyl cyanide

### <sup>1</sup>H NMR spectra

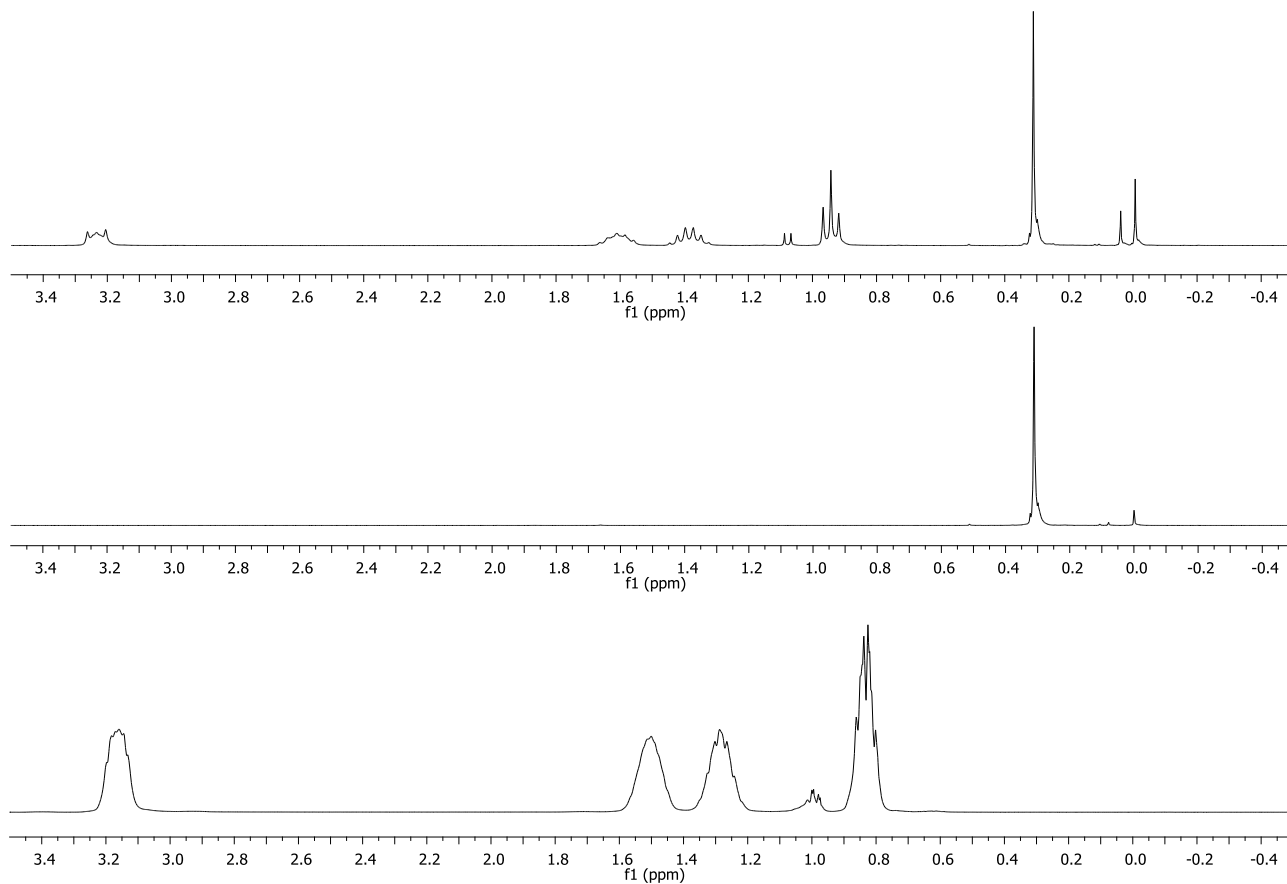

Bottom: <sup>1</sup>H NMR spectrum of Bu<sub>4</sub>NCN.

Middle: <sup>1</sup>H NMR spectrum of Me<sub>3</sub>SiCN.

Top: <sup>1</sup>H NMR spectrum of a 1:1 mixture of Me<sub>3</sub>SiCN and Bu<sub>4</sub>NCN showing changes in the chemical shift of the butyl groups and the presence of a new signal at +0.04 ppm consistent with the hypervalent silicon species Bu<sub>4</sub>N<sup>+</sup> [Me<sub>3</sub>Si(CN)<sub>2</sub>]<sup>-</sup>.

$^{13}\text{C}$  NMR spectra

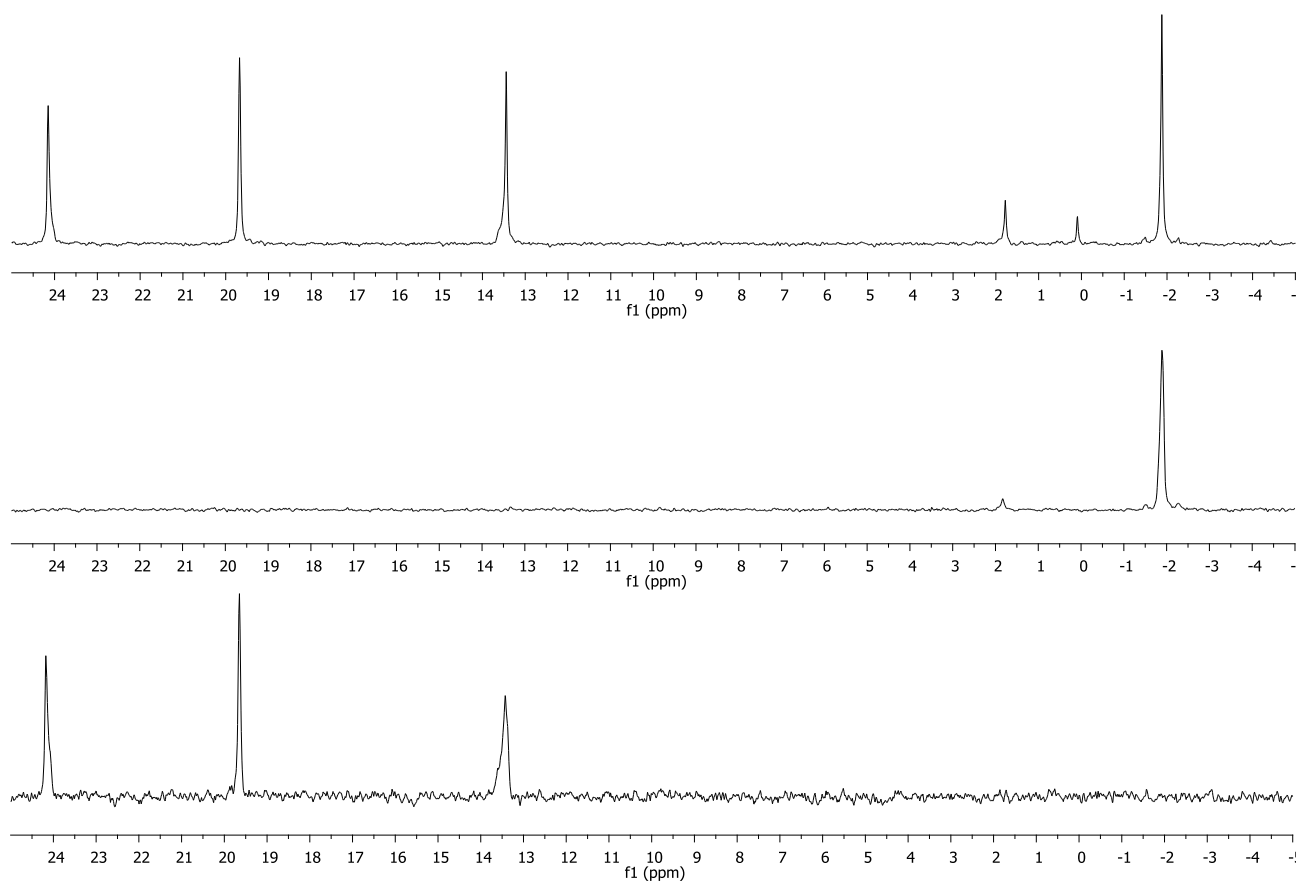

Bottom:  $^{13}\text{C}$  NMR spectrum of  $\text{Bu}_4\text{NCN}$ .

Middle:  $^{13}\text{C}$  NMR spectrum of  $\text{Me}_3\text{SiCN}$ .

Top:  $^{13}\text{C}$  NMR spectrum of a 1:1 mixture of  $\text{Me}_3\text{SiCN}$  and  $\text{Bu}_4\text{NCN}$  showing the presence of a new signal at +1.79 ppm consistent with the hypervalent silicon species  $\text{Bu}_4\text{N}^+ [\text{Me}_3\text{Si}(\text{CN})_2]^-$ .



## Kinetic plots used to determine the influence of water

### **Addition of trimethylsilyl cyanide to 3,4-dimethylbenzaldehyde catalysed by Bu<sub>4</sub>NN<sub>3</sub> 3**

All of the following plots correspond to 86-89% conversion and show both the greatly reduced reaction time and the change in reaction order in the presence of water.

#### Reaction under anhydrous conditions (second order kinetics plot)

*Run 1*

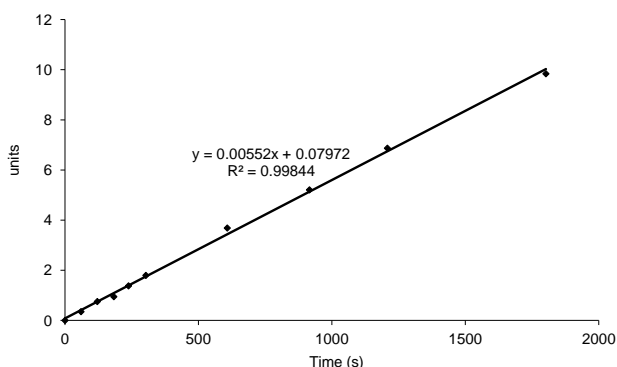

*Run 2*

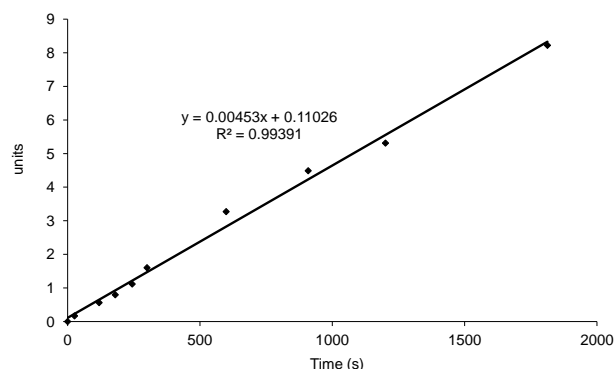

The units for the vertical scale are:  $\ln[(B_0A_t)/(B_tA_0)]/(A_0-B_0)$  where: A = [PhCHO], B = [Me<sub>3</sub>SiCN] and the subscripts 0 and t refer to initial concentrations and concentrations at time t, respectively. The concentration of benzaldehyde was monitored.

#### Reaction in the presence of water

*Run 1*

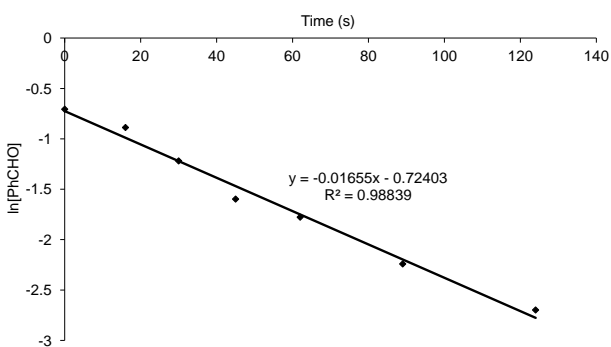

*Run 2*

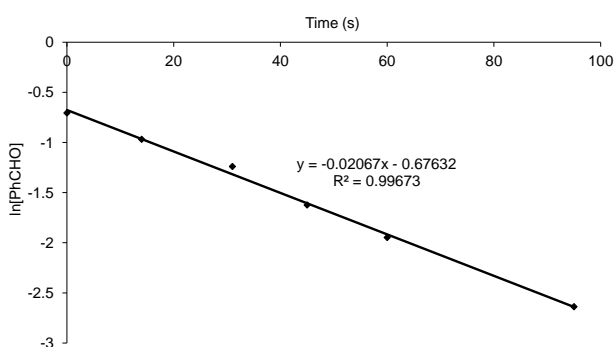

# Plots showing that in the presence of water, the reaction is still first order in Et<sub>3</sub>N concentration

[Et<sub>3</sub>N] = 0.001 M (corresponds to 0.2 mol%)

Run 1

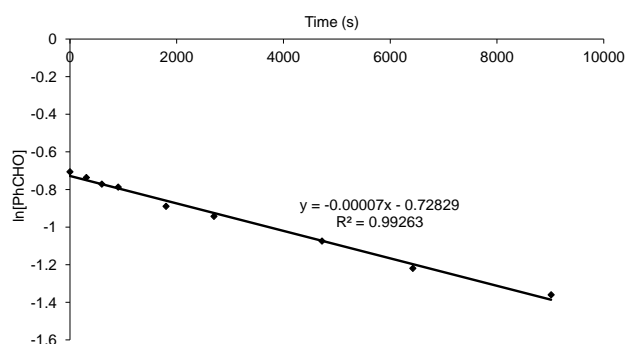

Run 2

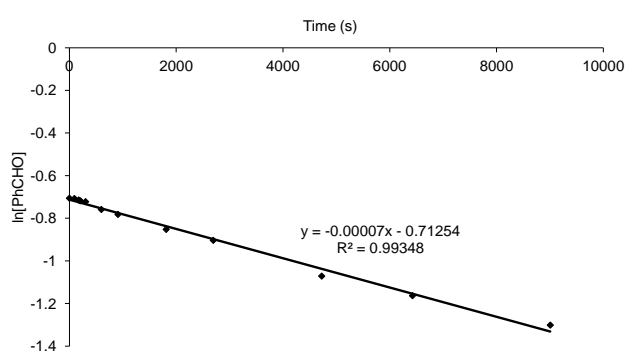

[Et<sub>3</sub>N] = 0.002 M (corresponds to 0.4 mol%)

Run 1

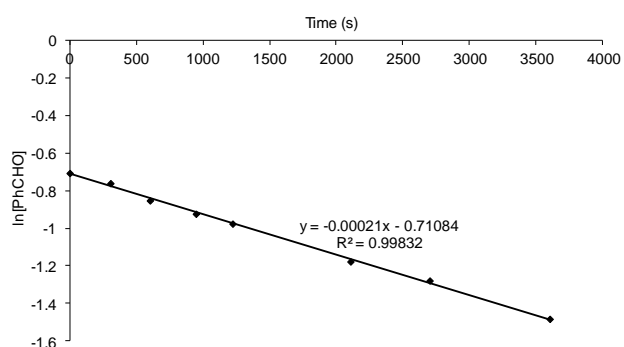

Run 2

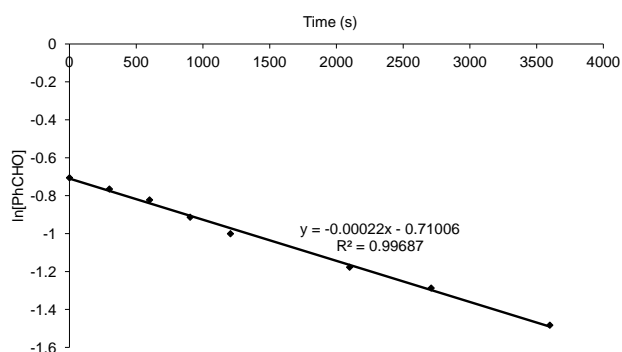

[Et<sub>3</sub>N] = 0.004 M (corresponds to 0.8 mol%)

Run 1

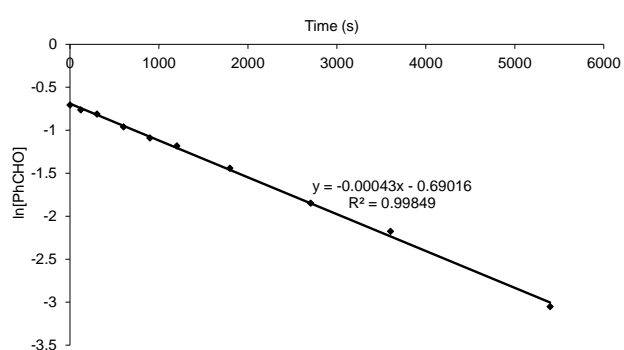

Run 2

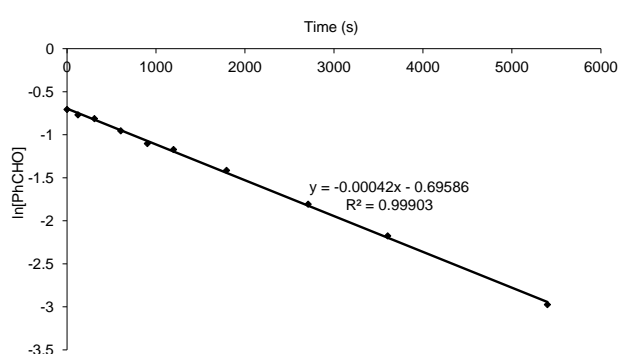

$[\text{Et}_3\text{N}] = 0.02 \text{ M}$  (corresponds to 4 mol%)

*Run 1*

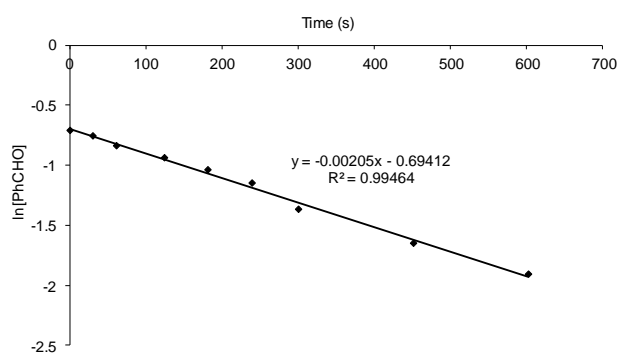

*Run 2*

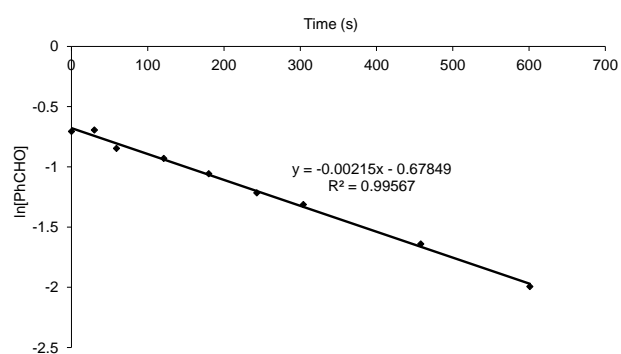

Plot of  $k_{\text{obs}}$  against  $[\mathbf{1}]$  in the presence of water

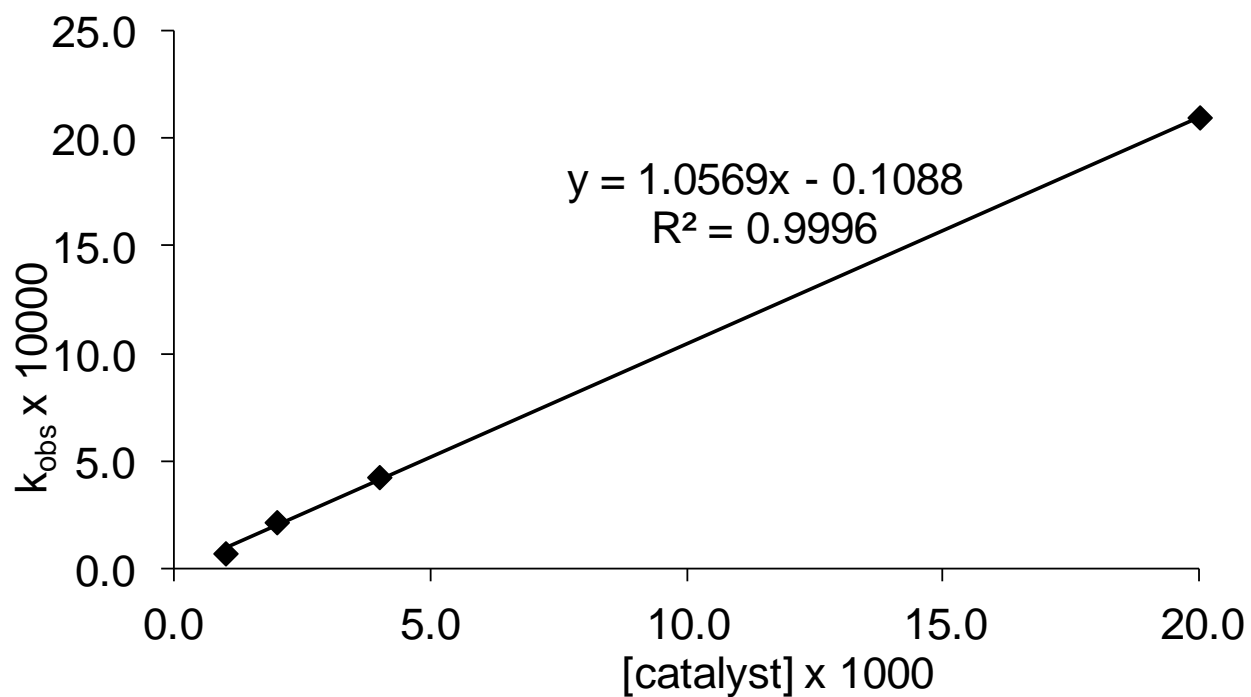

The solid line and filled data points show the average of two data sets.

# **Addition of trimethylsilyl cyanide to benzaldehydes catalysed by Et<sub>3</sub>N 1 in the presence of water**

## Benzaldehyde run 1

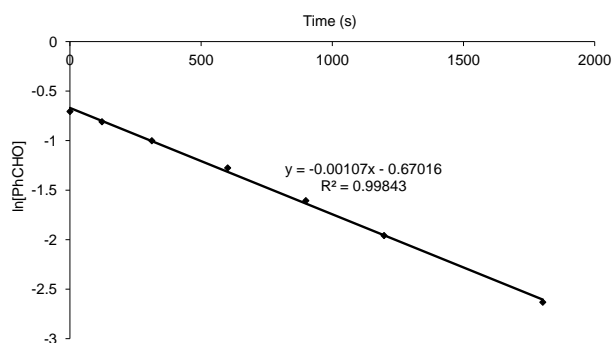

## Benzaldehyde run 2

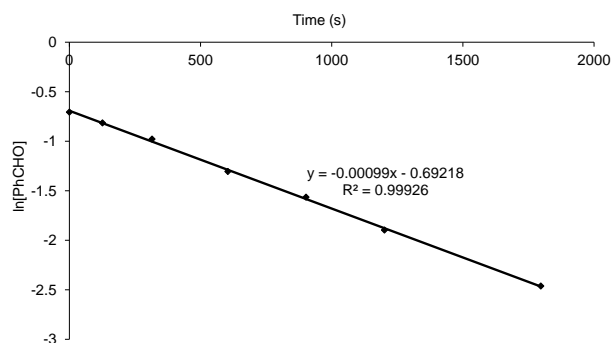

## 3-Chlorobenzaldehyde run 1

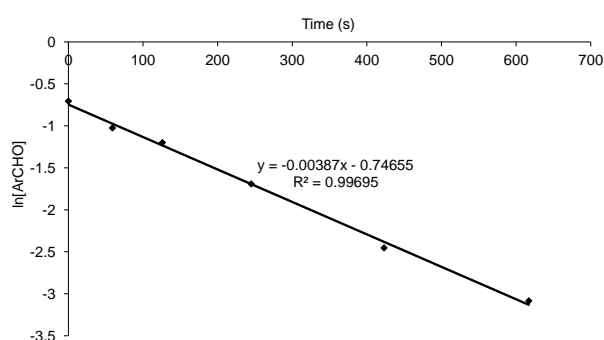

## 3-Chlorobenzaldehyde run 2

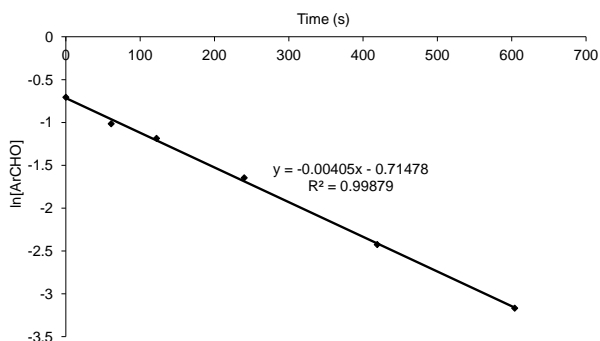

## 3-Fluorobenzaldehyde run 1

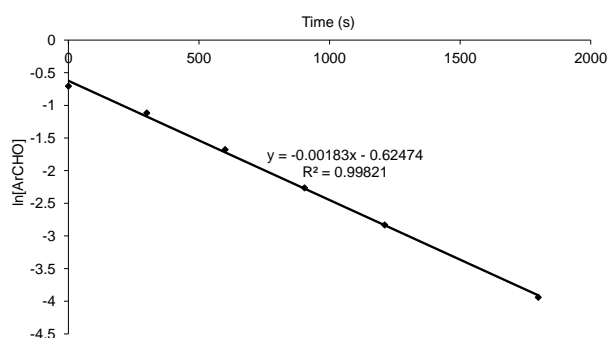

## 3-Fluorobenzaldehyde run 2

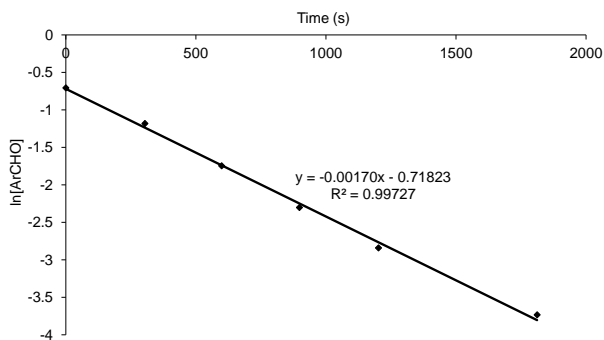

## 4-Chlorobenzaldehyde run 1

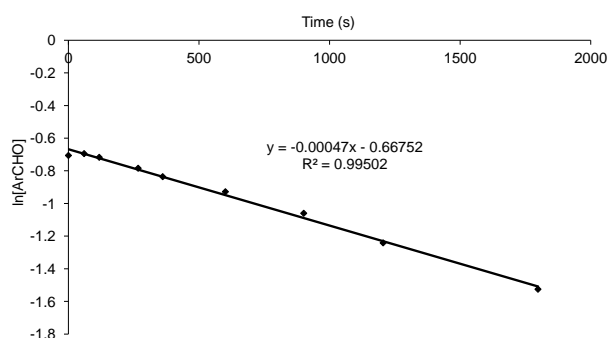

## 4-Chlorobenzaldehyde run 2

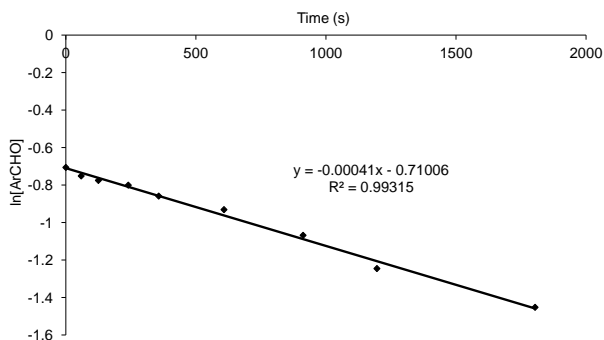

#### 4-Fluorobenzaldehyde run 1

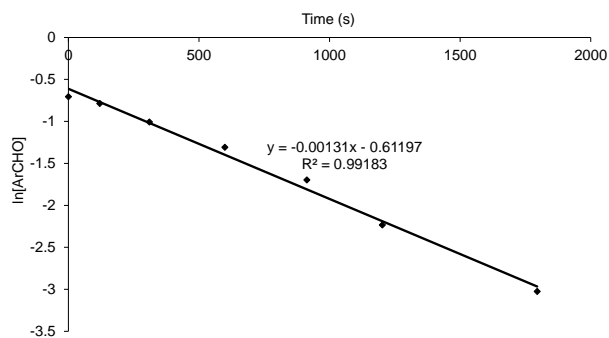

#### 4-Fluorobenzaldehyde run 2

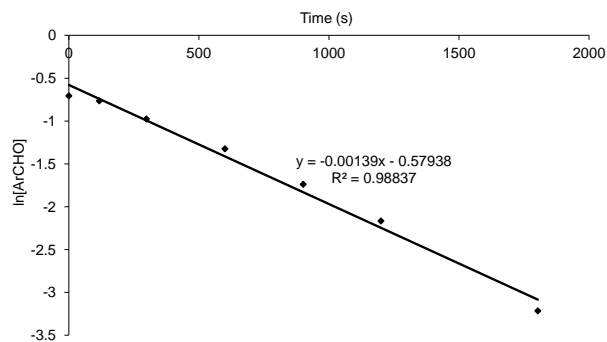

#### 4-Thiomethylbenzaldehyde run 1

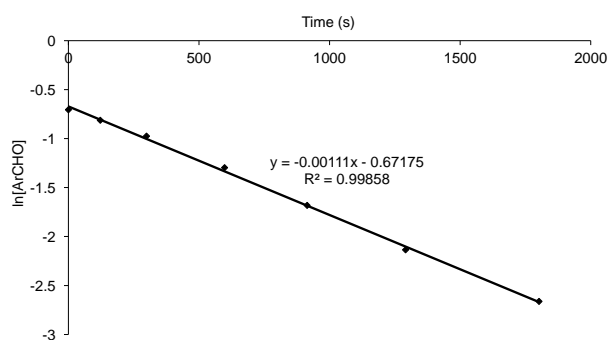

#### 4-Thiomethylbenzaldehyde run 2

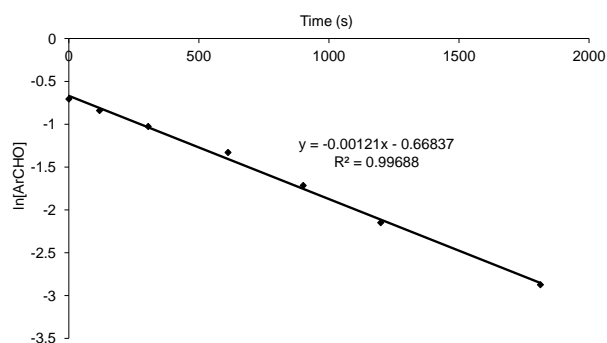

#### 3-Methylbenzaldehyde run 1

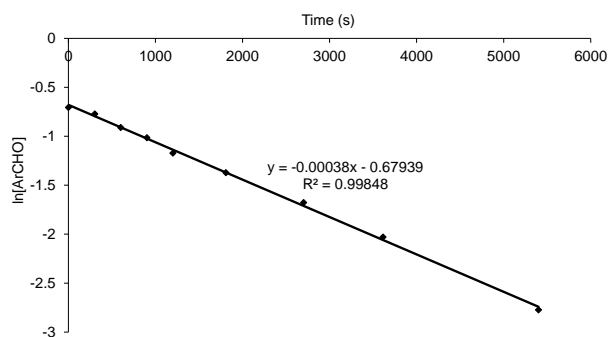

#### 3-Methylbenzaldehyde run 2

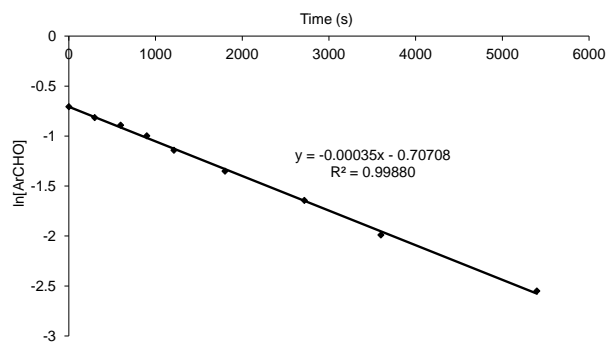

#### 4-Methylbenzaldehyde run 1

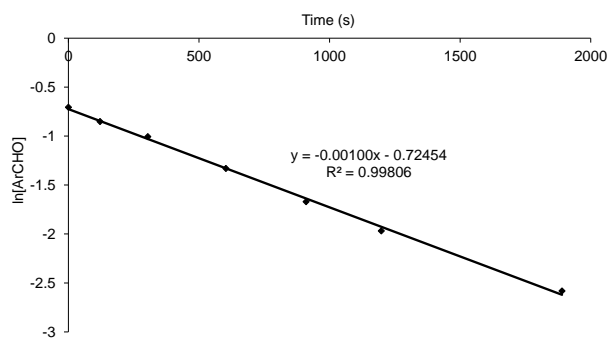

#### 4-Methylbenzaldehyde run 2

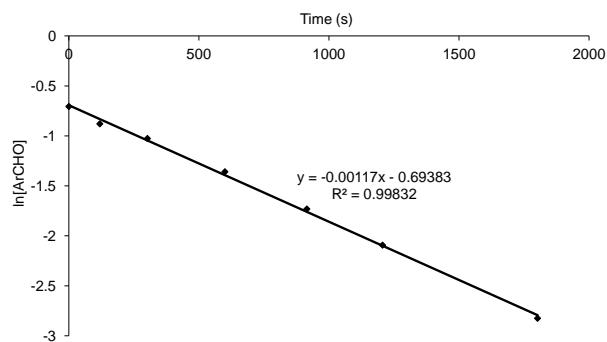

### 3,4-Dimethylbenzaldehyde run 1

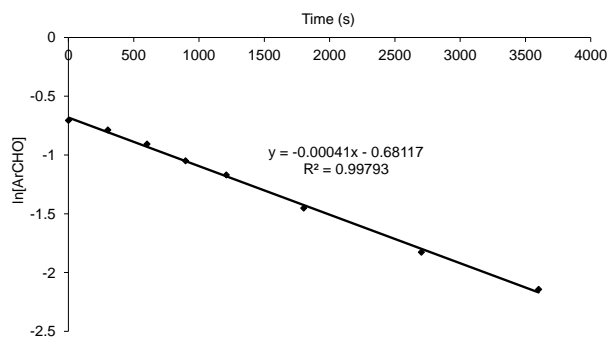

### 3,4-Dimethylbenzaldehyde run 2

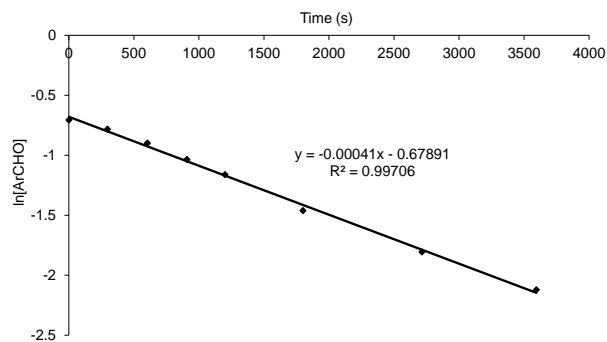

### 4-Methoxybenzaldehyde run 1

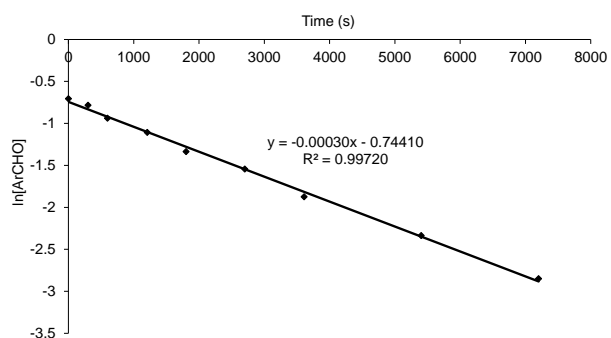

### 4-Methoxybenzaldehyde run 2

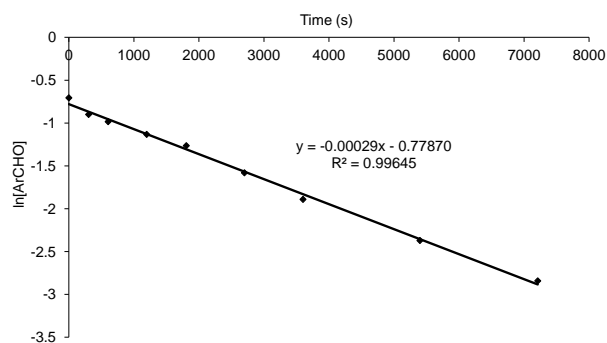

### Hammett plot for the Et<sub>3</sub>N catalysed reaction in the presence of water

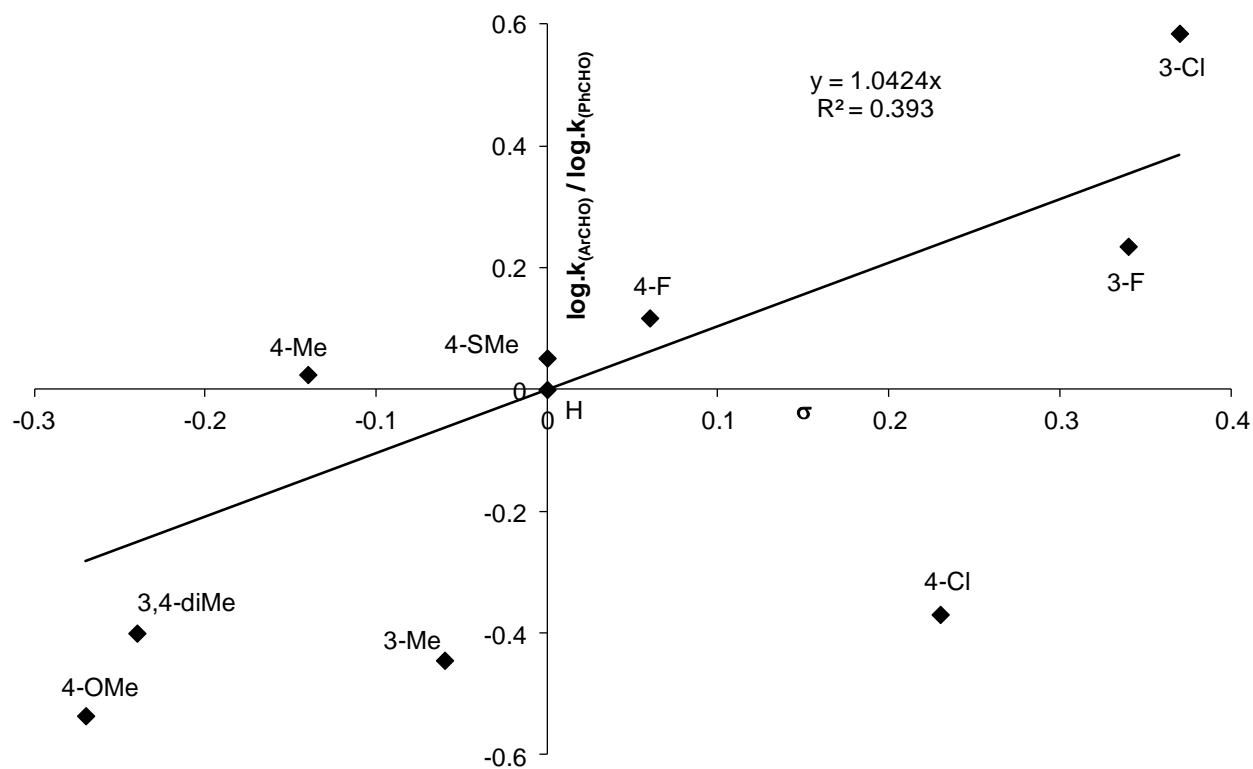

## Variable temperature kinetic study of the addition of trimethylsilyl cyanide to benzaldehyde catalysed by Et<sub>3</sub>N in the presence of water

Reaction at +10 °C run 1

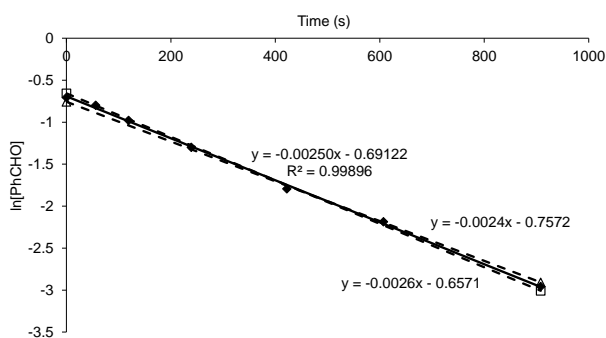

Reaction at +10 °C run 2

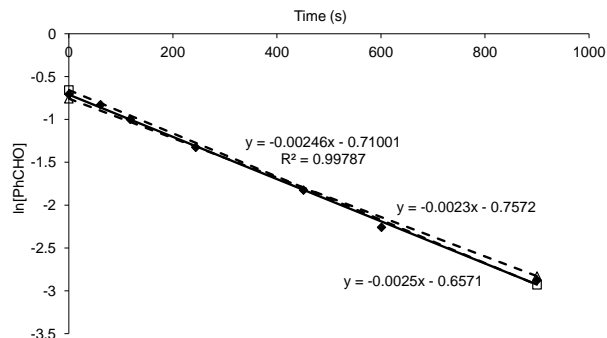

The solid line, filled diamonds and equation with  $R^2$  value correspond to the actual data and best fit line whilst the empty squares and diamonds, broken line and equations without  $R^2$  values correspond to a +/- 5% error applied to the absorbance of the first and last data points.

Reaction at 0 °C run 1

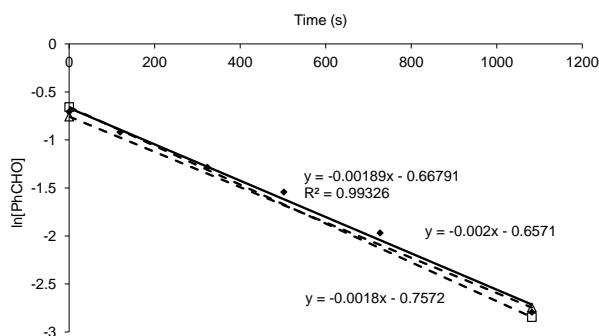

Reaction at 0 °C run 2

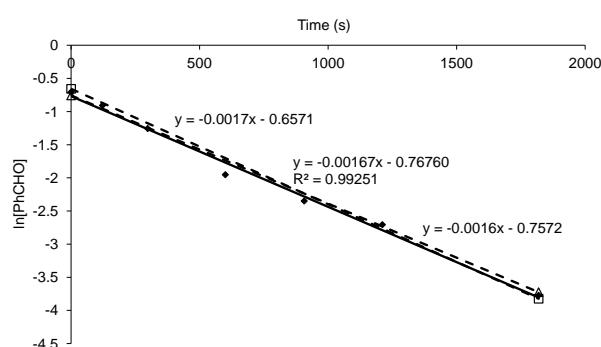

The solid line, filled diamonds and equation with  $R^2$  value correspond to the actual data and best fit line whilst the empty squares and diamonds, broken line and equations without  $R^2$  values correspond to a +/- 5% error applied to the absorbance of the first and last data points.

Reaction at -10 °C run 1

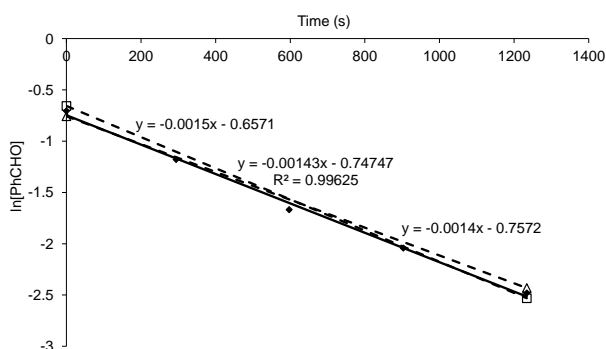

Reaction at -10 °C run 2

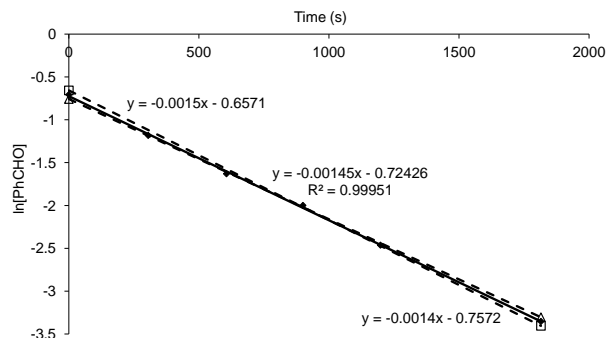

The solid line, filled diamonds and equation with  $R^2$  value correspond to the actual data and best fit line whilst the empty squares and diamonds, broken line and equations without  $R^2$  values correspond to a +/- 5% error applied to the absorbance of the first and last data points.

### Reaction at -20 °C run 1

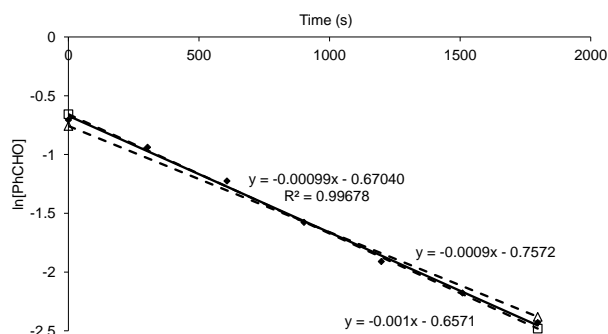

### Reaction at -20 °C run 2

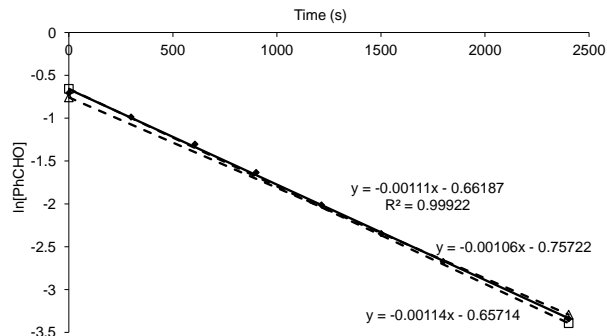

The solid line, filled diamonds and equation with  $R^2$  value correspond to the actual data and best fit line whilst the empty squares and diamonds, broken line and equations without  $R^2$  values correspond to a  $\pm 5\%$  error applied to the absorbance of the first and last data points.

### Eyring plot

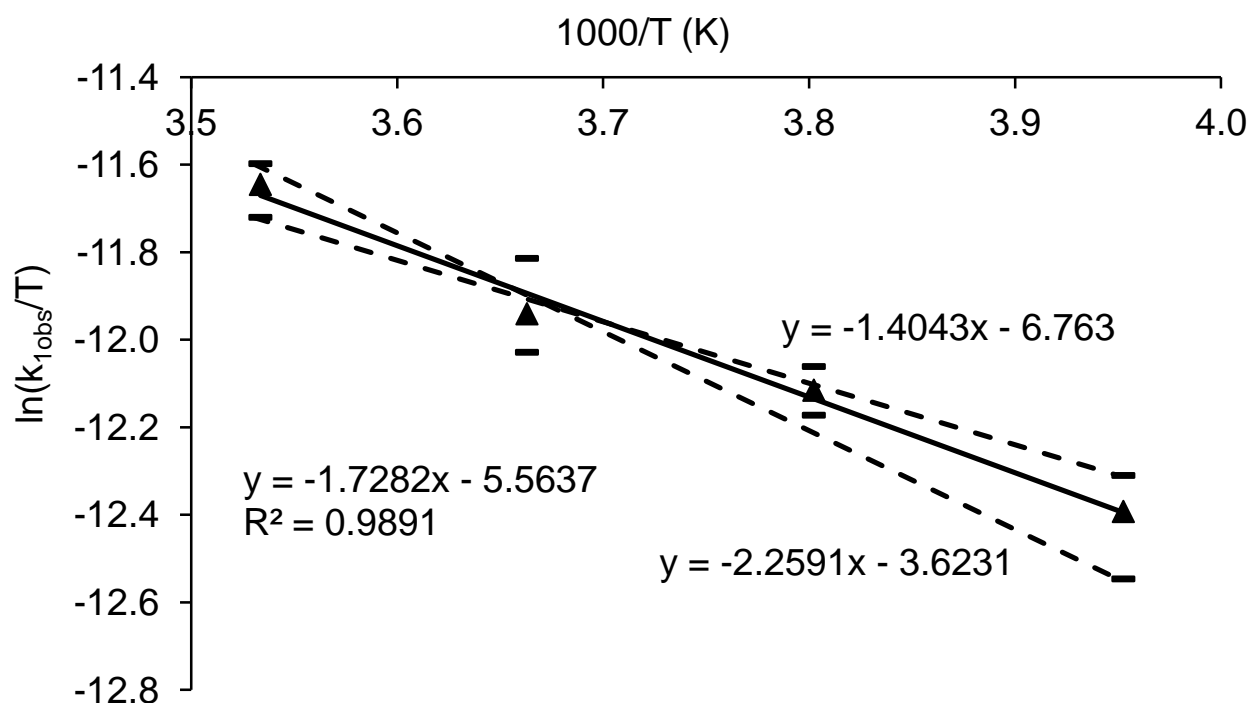

The filled triangles correspond to the average of the two individual rate measurements at each temperature and the solid line (and equation with  $R^2$  value) is the best fit line through these data points. The horizontal lines above and below each diamond correspond to the maximum and minimum value for that data point from either of the individual rate measurements. The broken lines (and equations without  $R^2$  values) correspond to the limiting values for the best fit line based on the error limits for the highest and lowest temperature points. The data in Table 5 of the manuscript were obtained by averaging the maximum and minimum values of  $\Delta H^\ddagger$  and  $\Delta S^\ddagger$  obtained from the broken lines rather than from the solid line so as to ensure that the quoted values were at the midpoint of the maximum and minimum values.



**<sup>1</sup>H NMR spectra of cyanohydrin trimethylsilyl ethers**

**2-Trimethylsilyloxy-phenylacetonitrile**

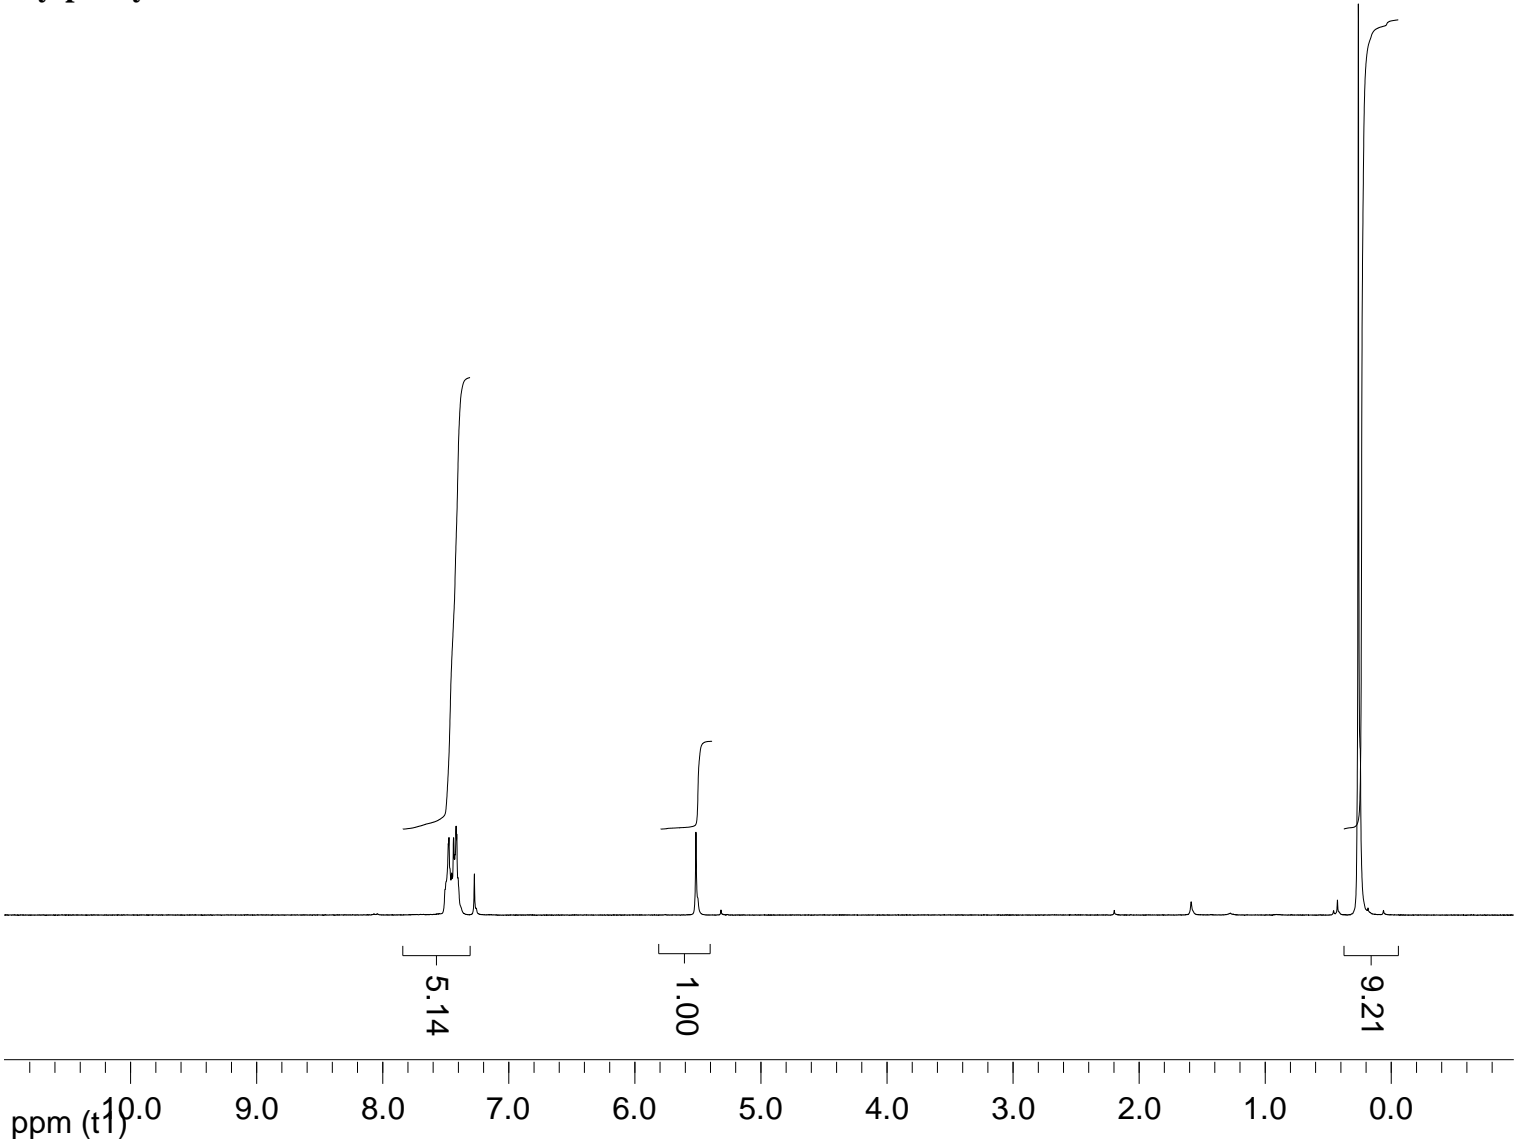

**2-Trimethylsilyloxy-(3,5-difluorophenyl)acetonitrile**

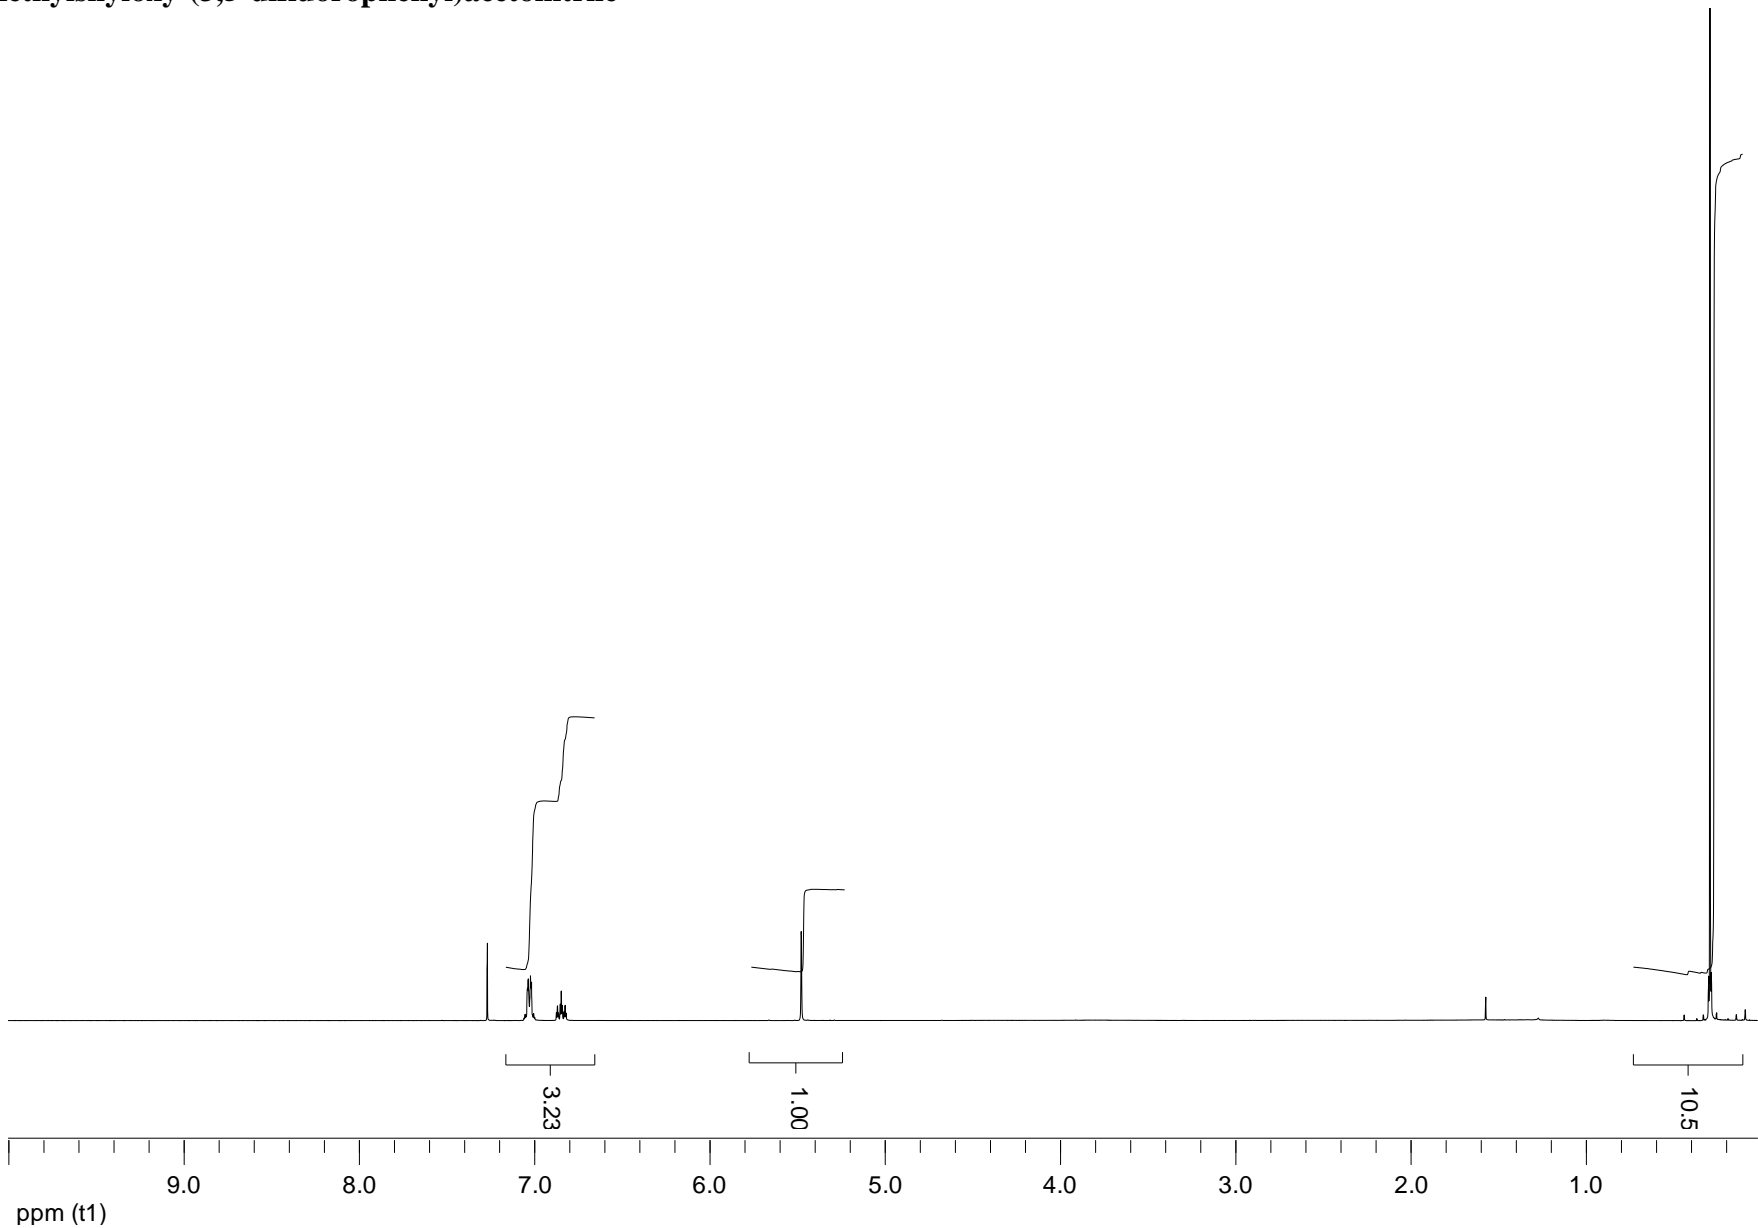

**2-Trimethylsilyloxy-(3,4-dichlorophenyl)acetonitrile**

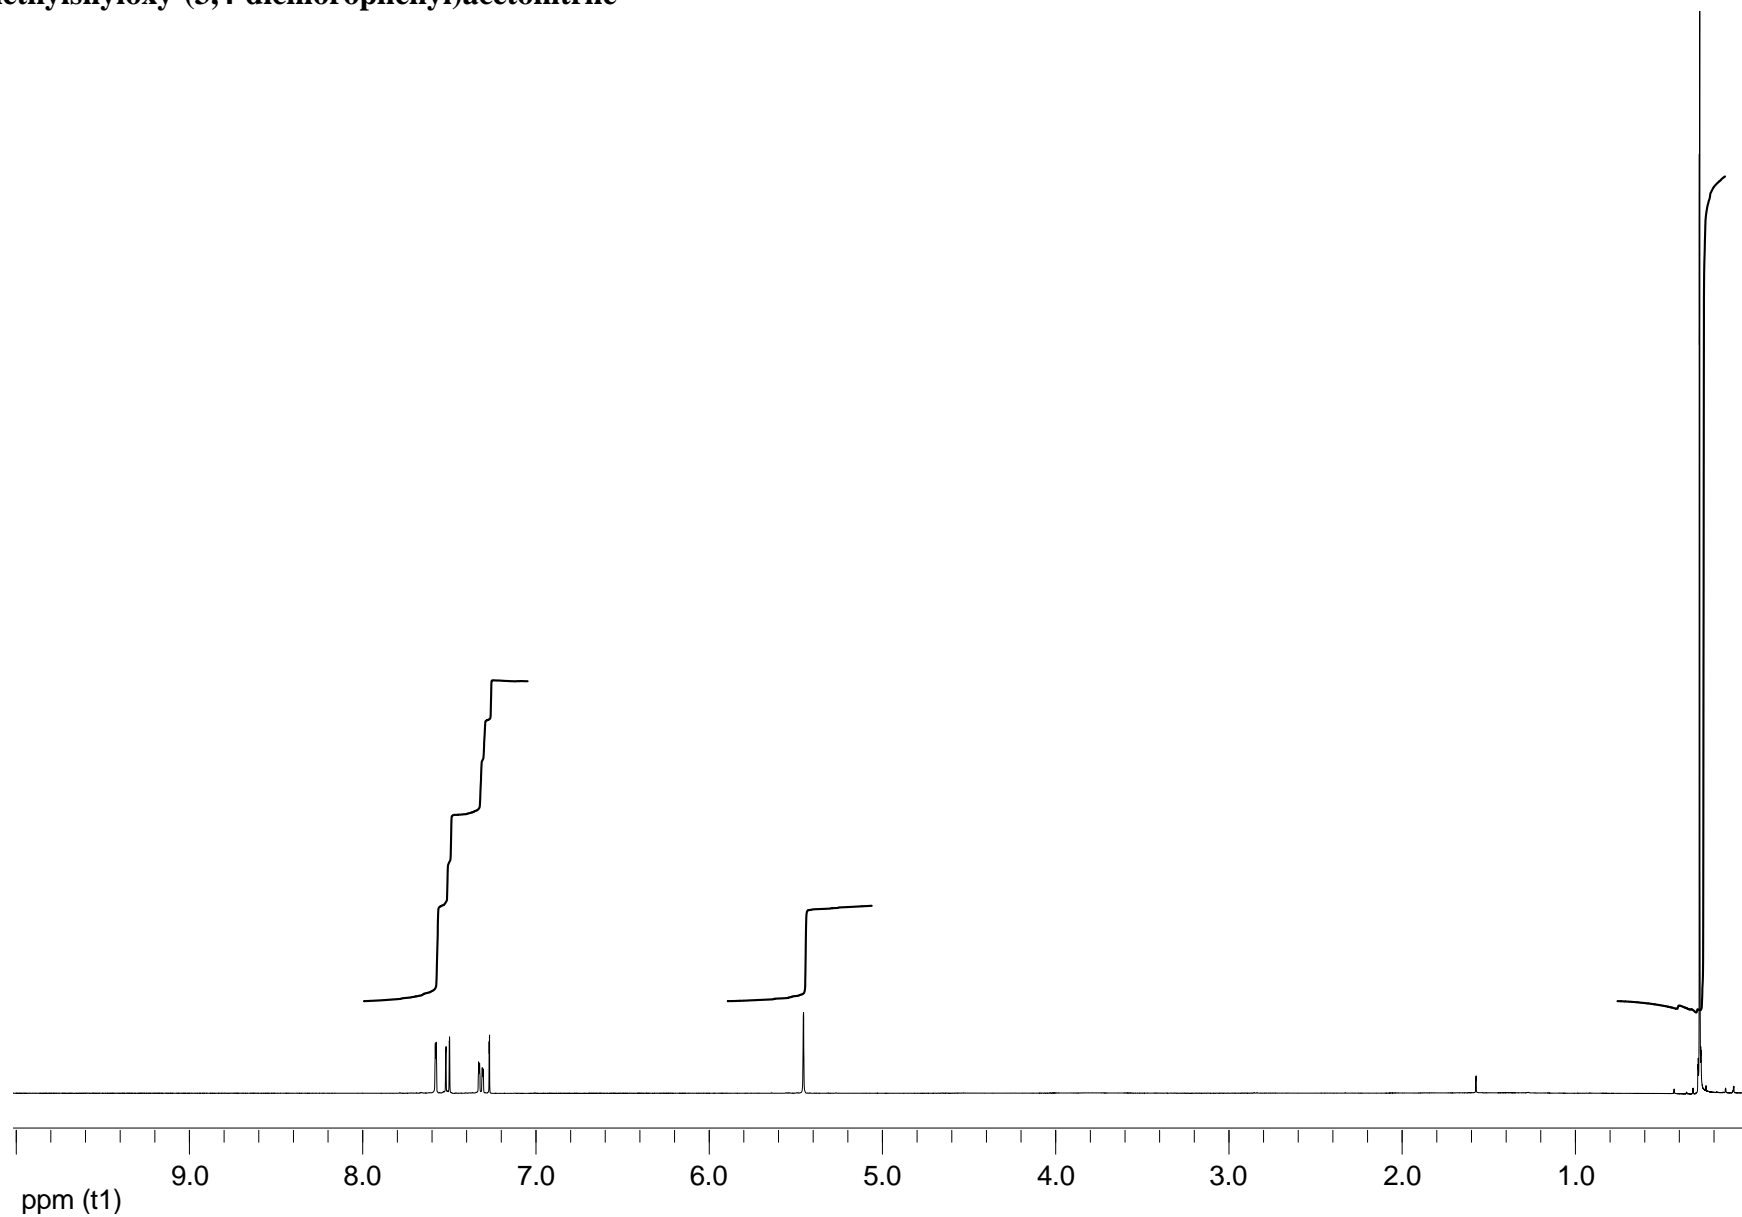

**2-Trimethylsilyloxy-(4-trifluoromethylphenyl)acetonitrile**

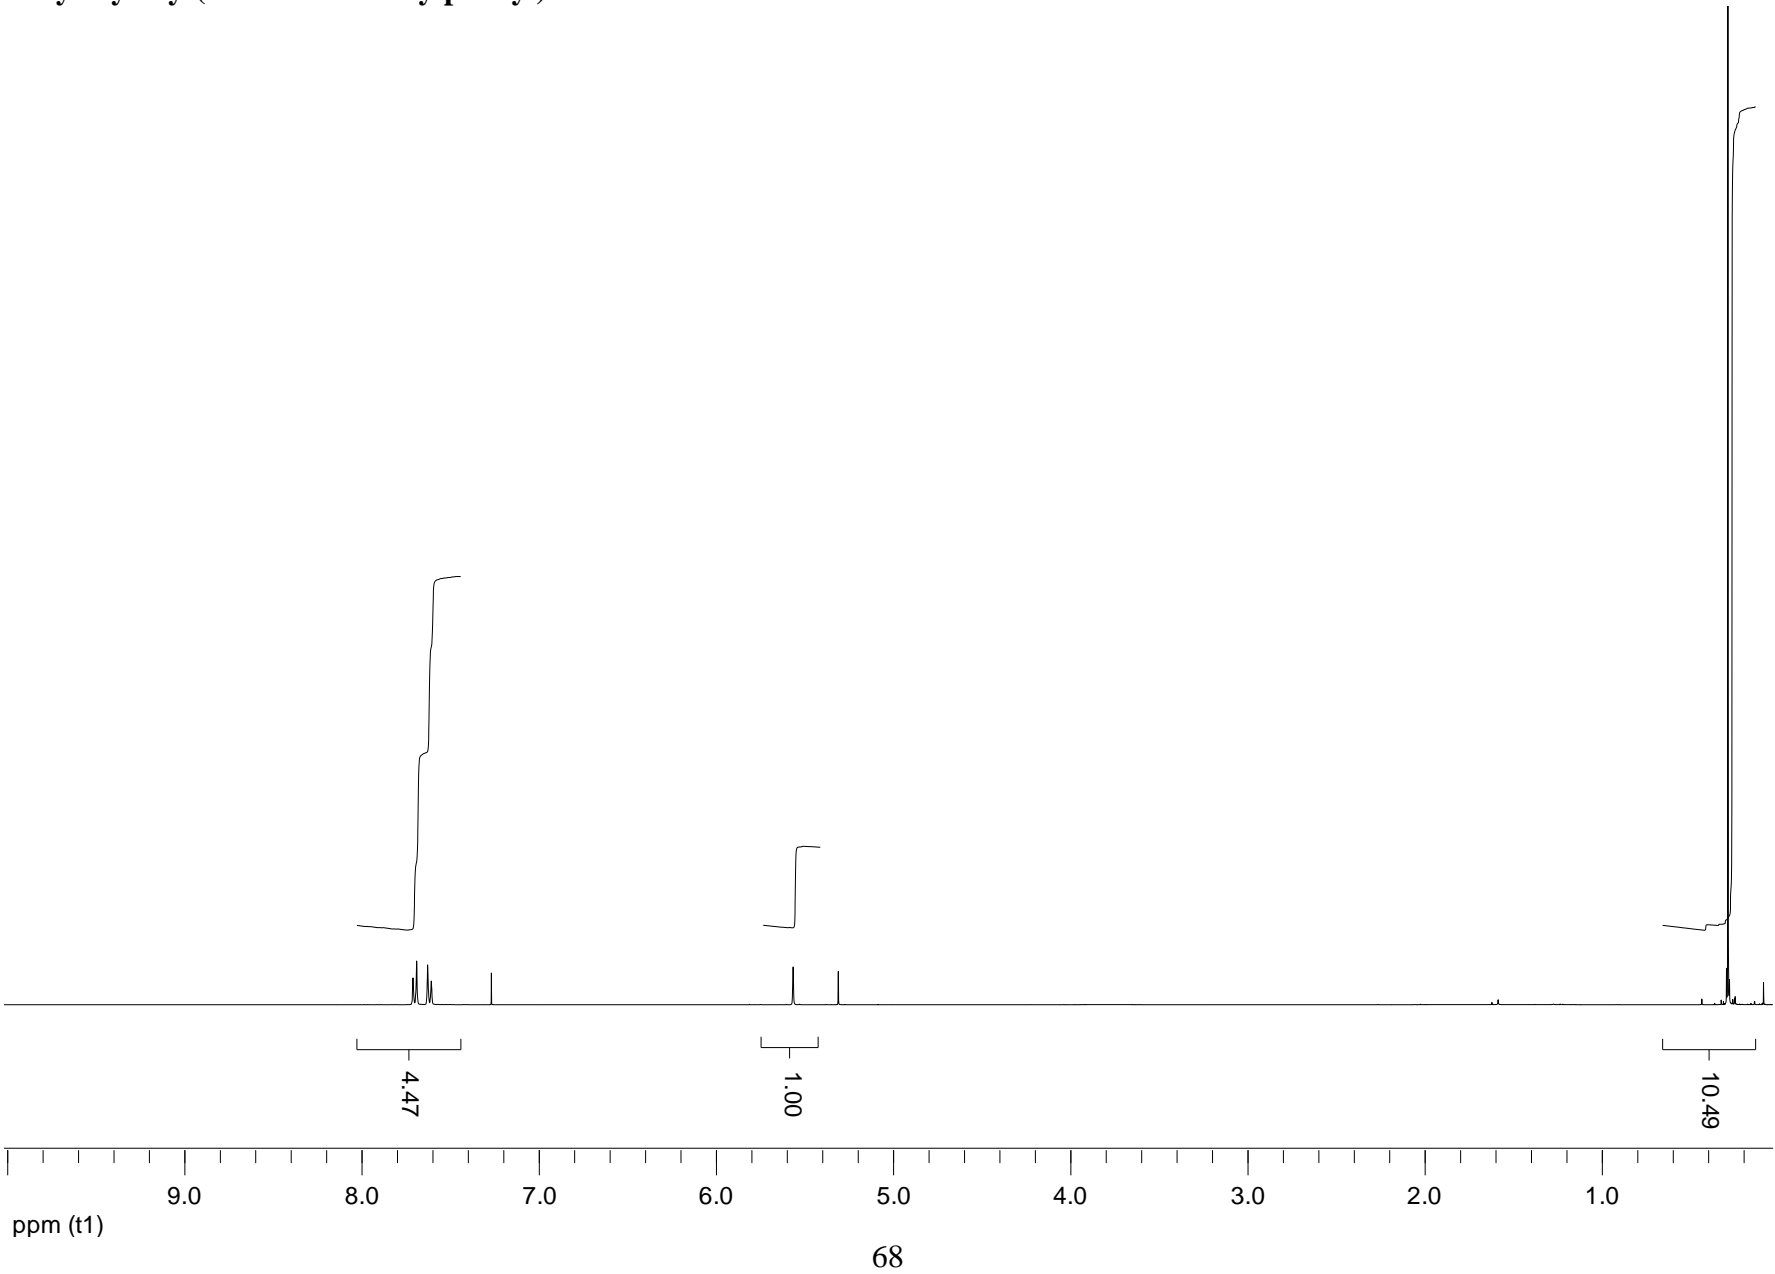

**2-Trimethylsilyloxy-(3-chlorophenyl)acetonitrile**

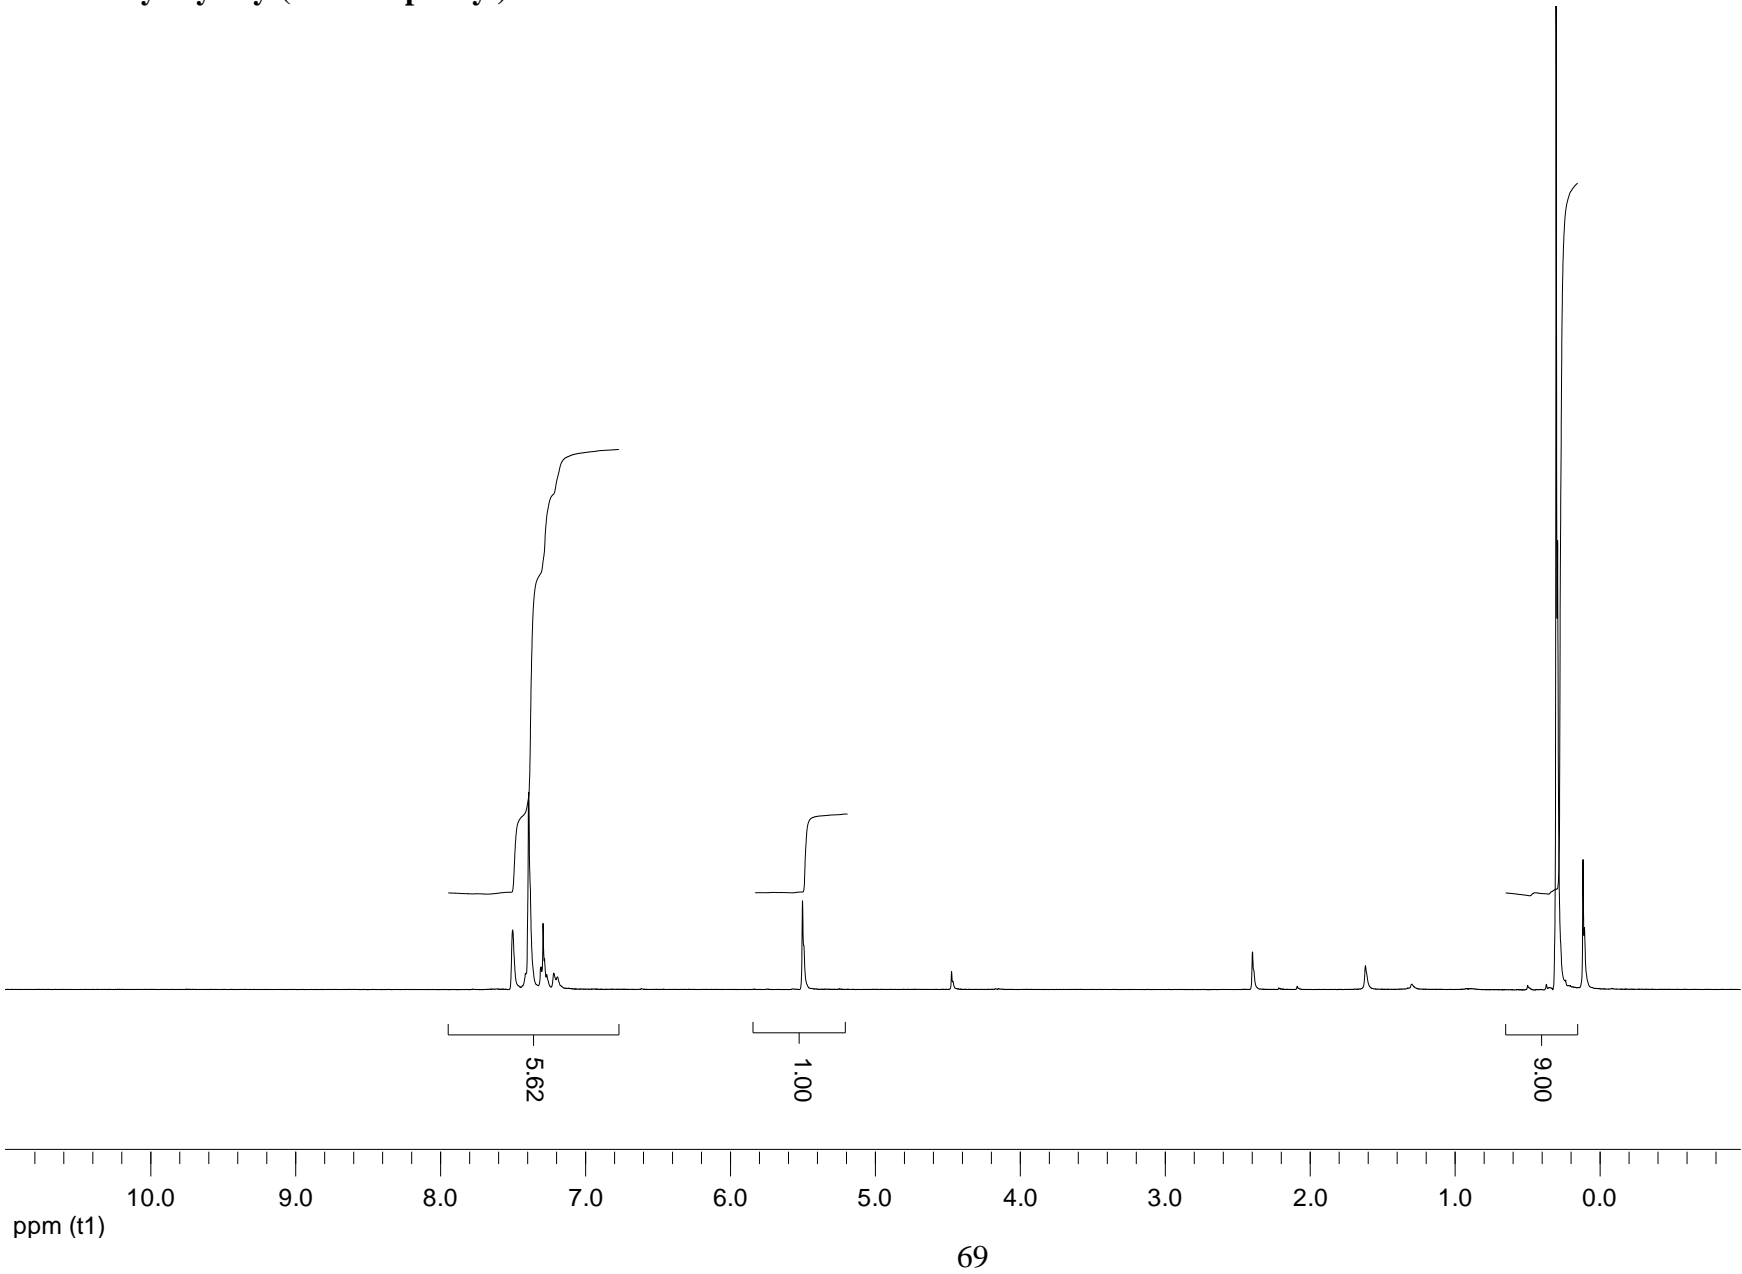

**2-Trimethylsilyloxy-(3-fluorophenyl)acetonitrile**

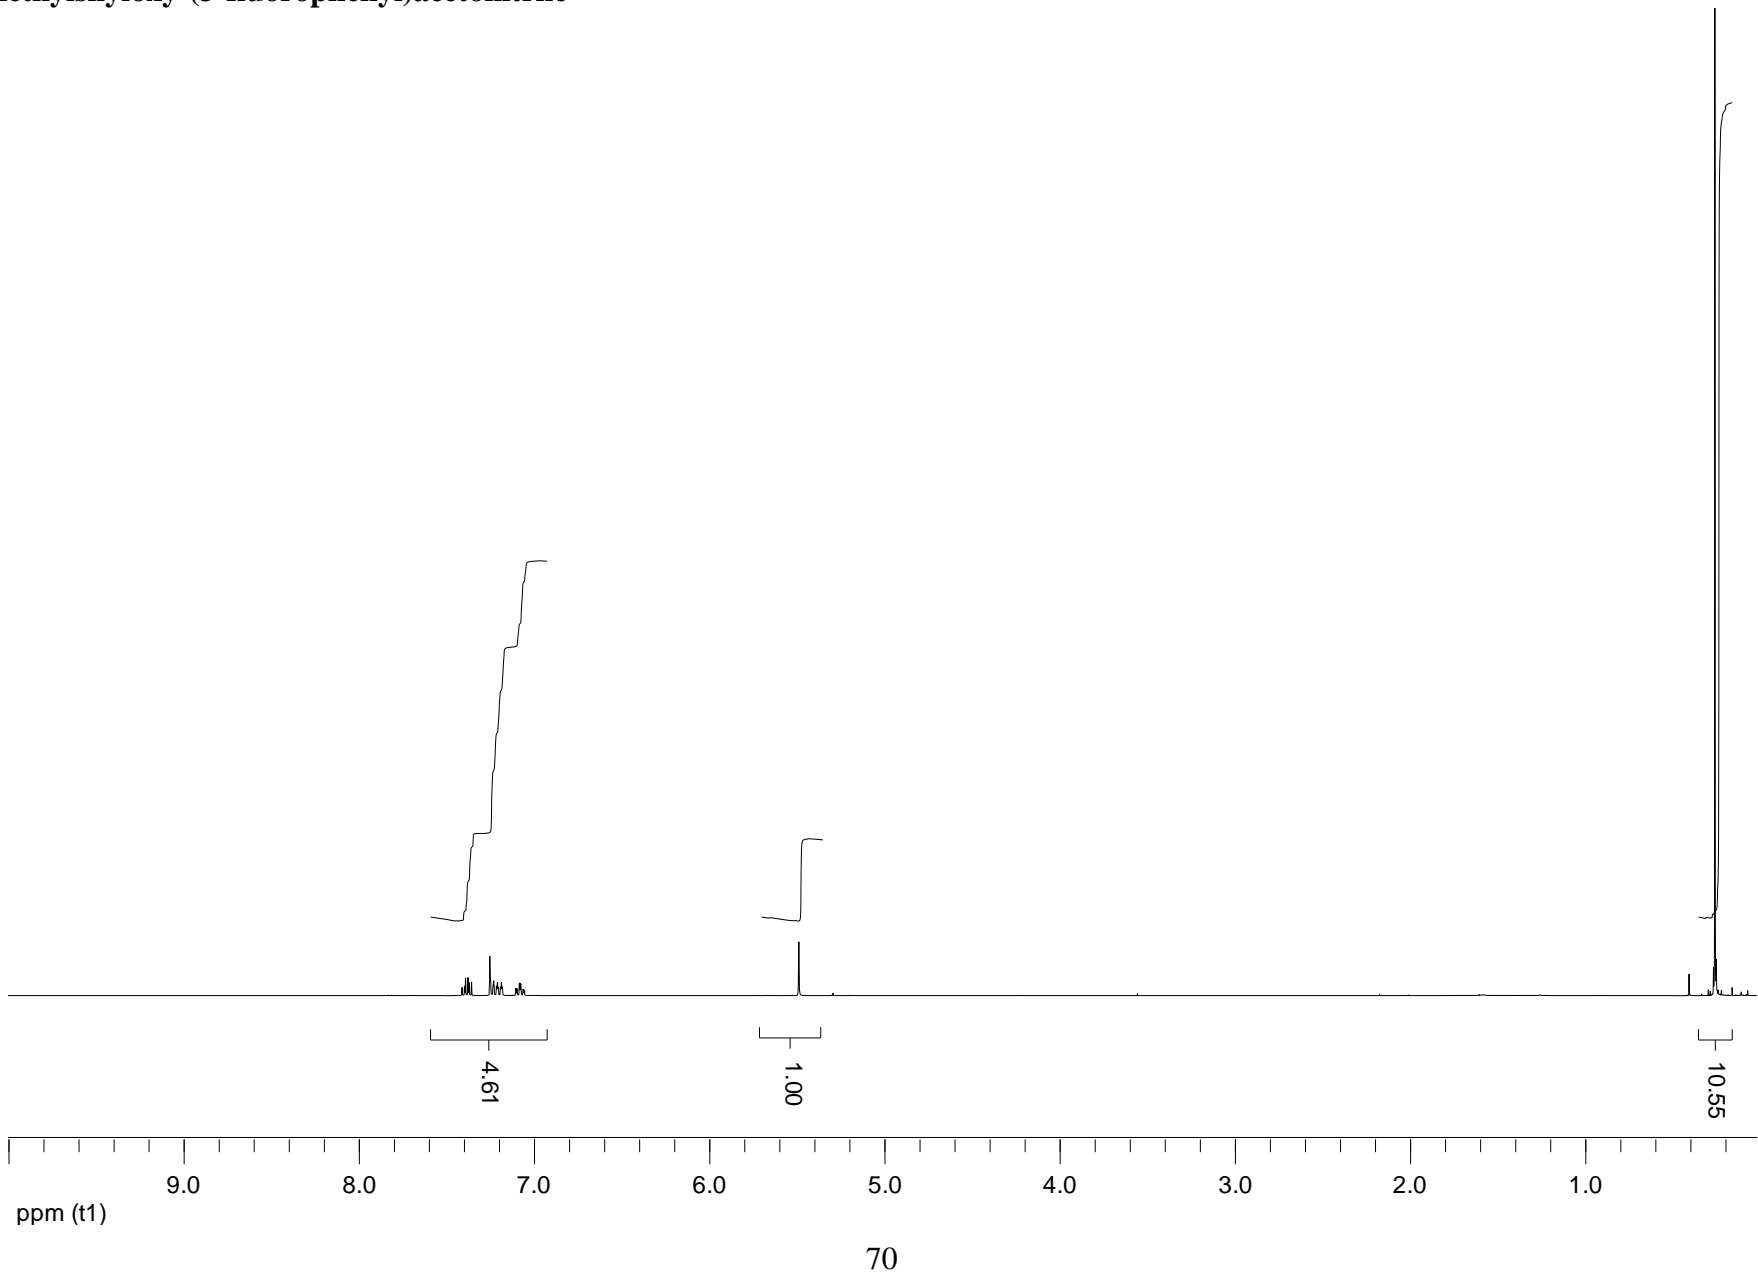

**2-Trimethylsilyloxy-(4-chlorophenyl)acetonitrile**

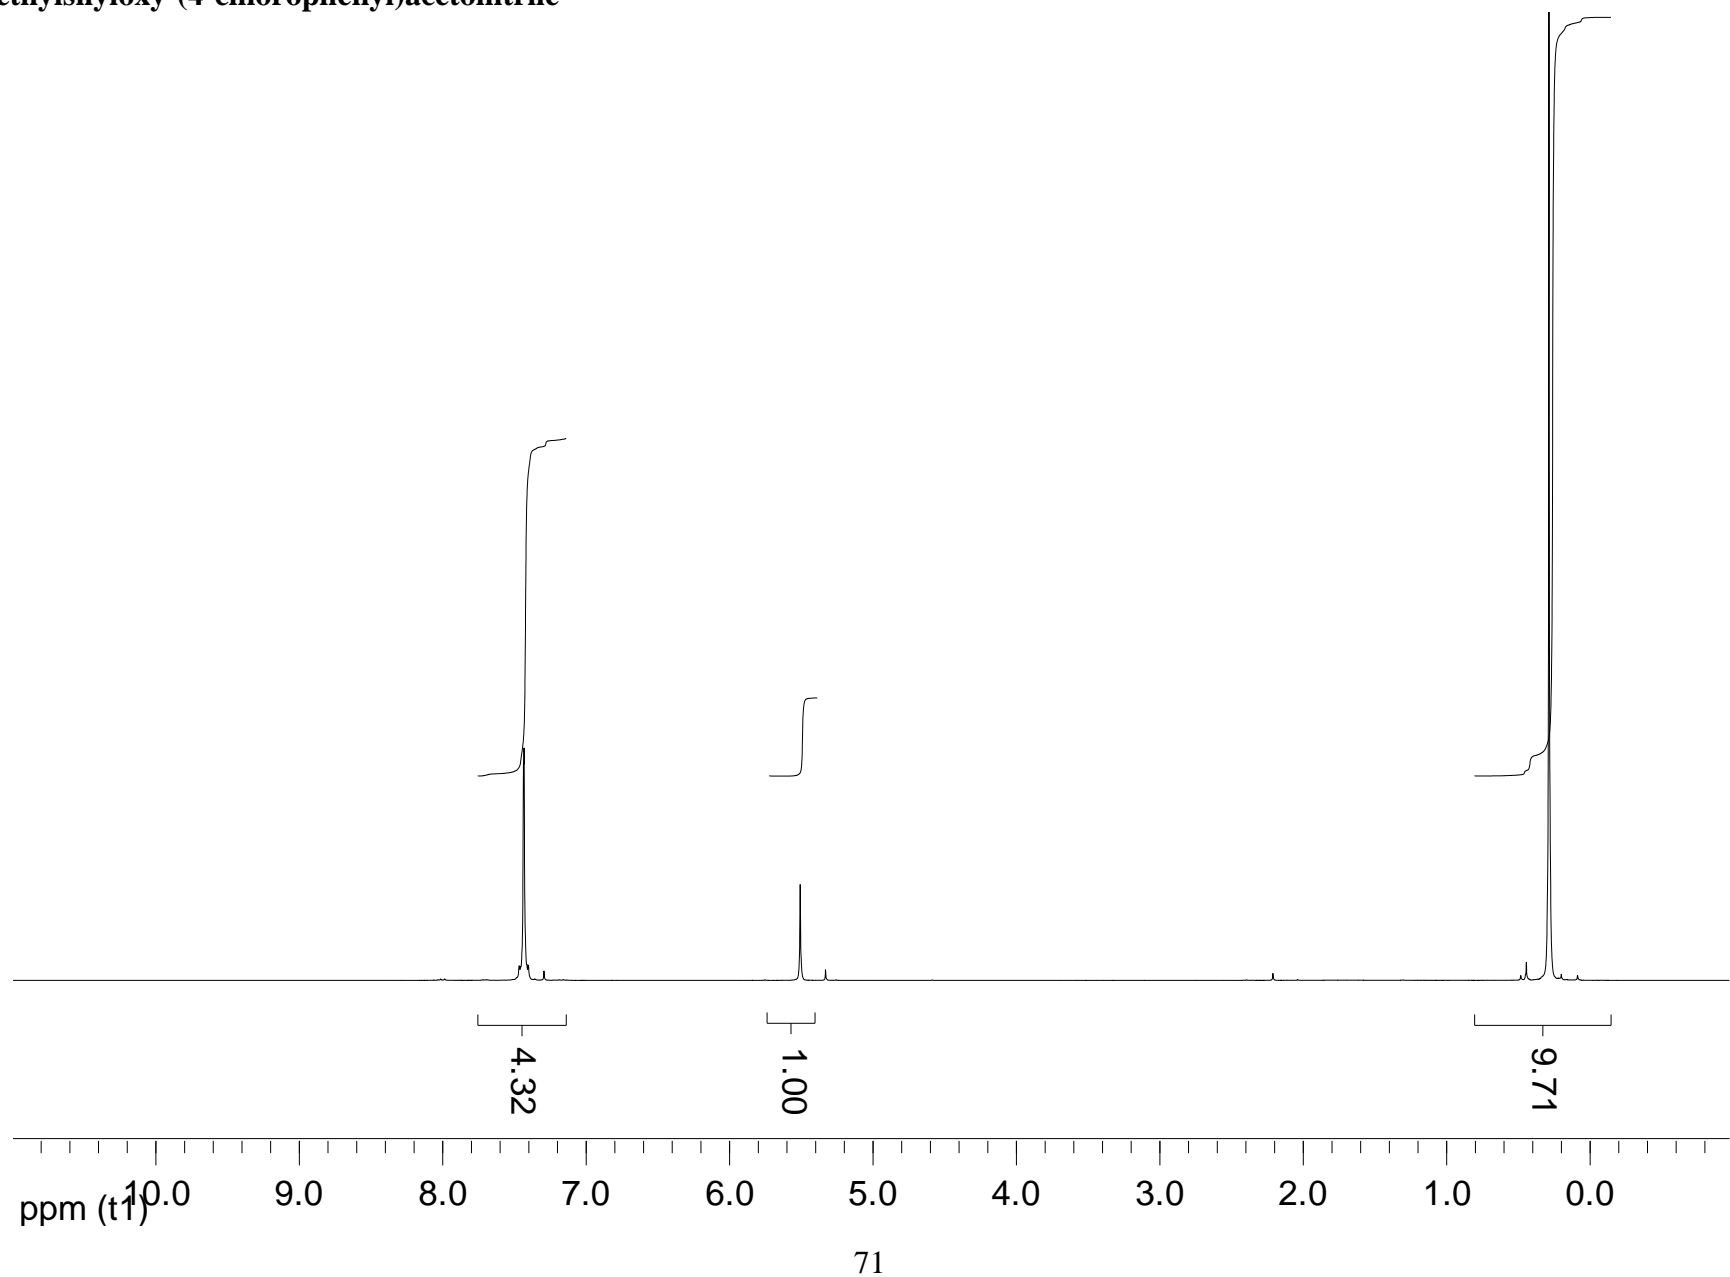

2-Trimethylsilyloxy-(4-bromophenyl)acetonitrile

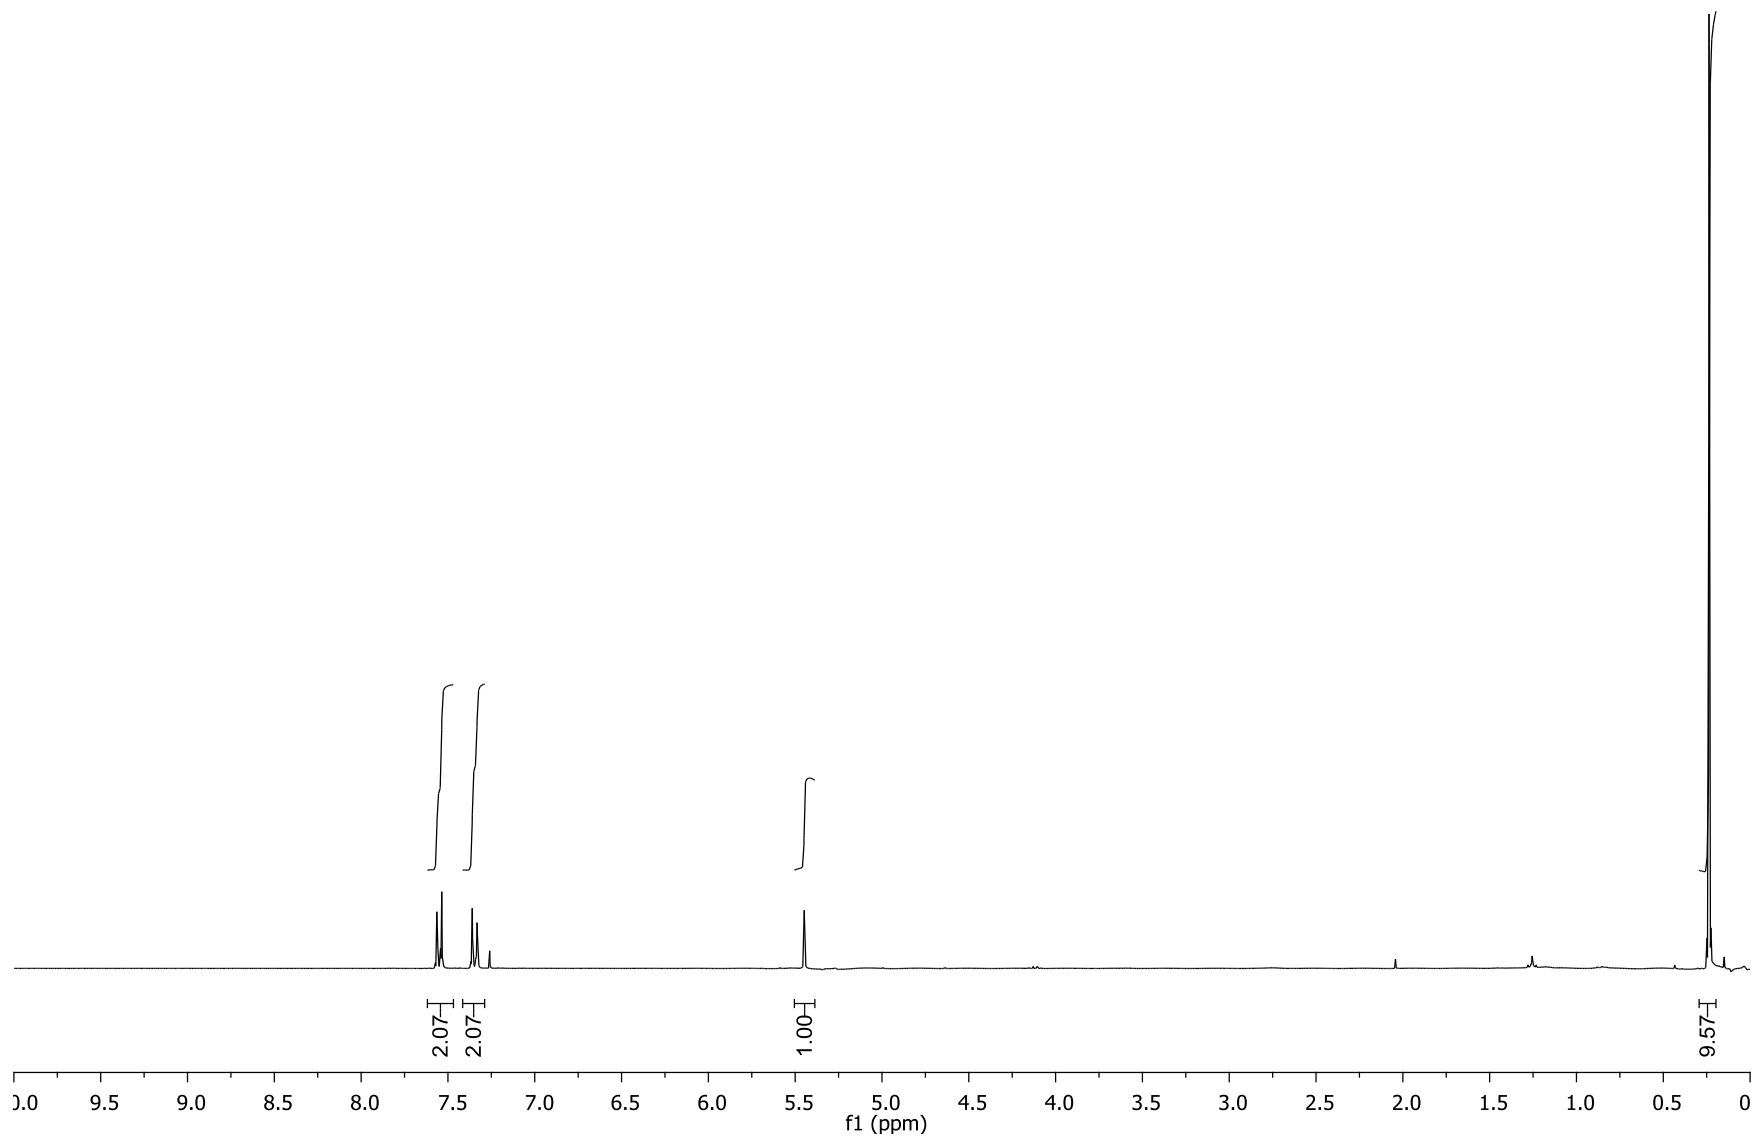



**2-Trimethylsilyloxy-(4-fluorophenyl)acetonitrile**

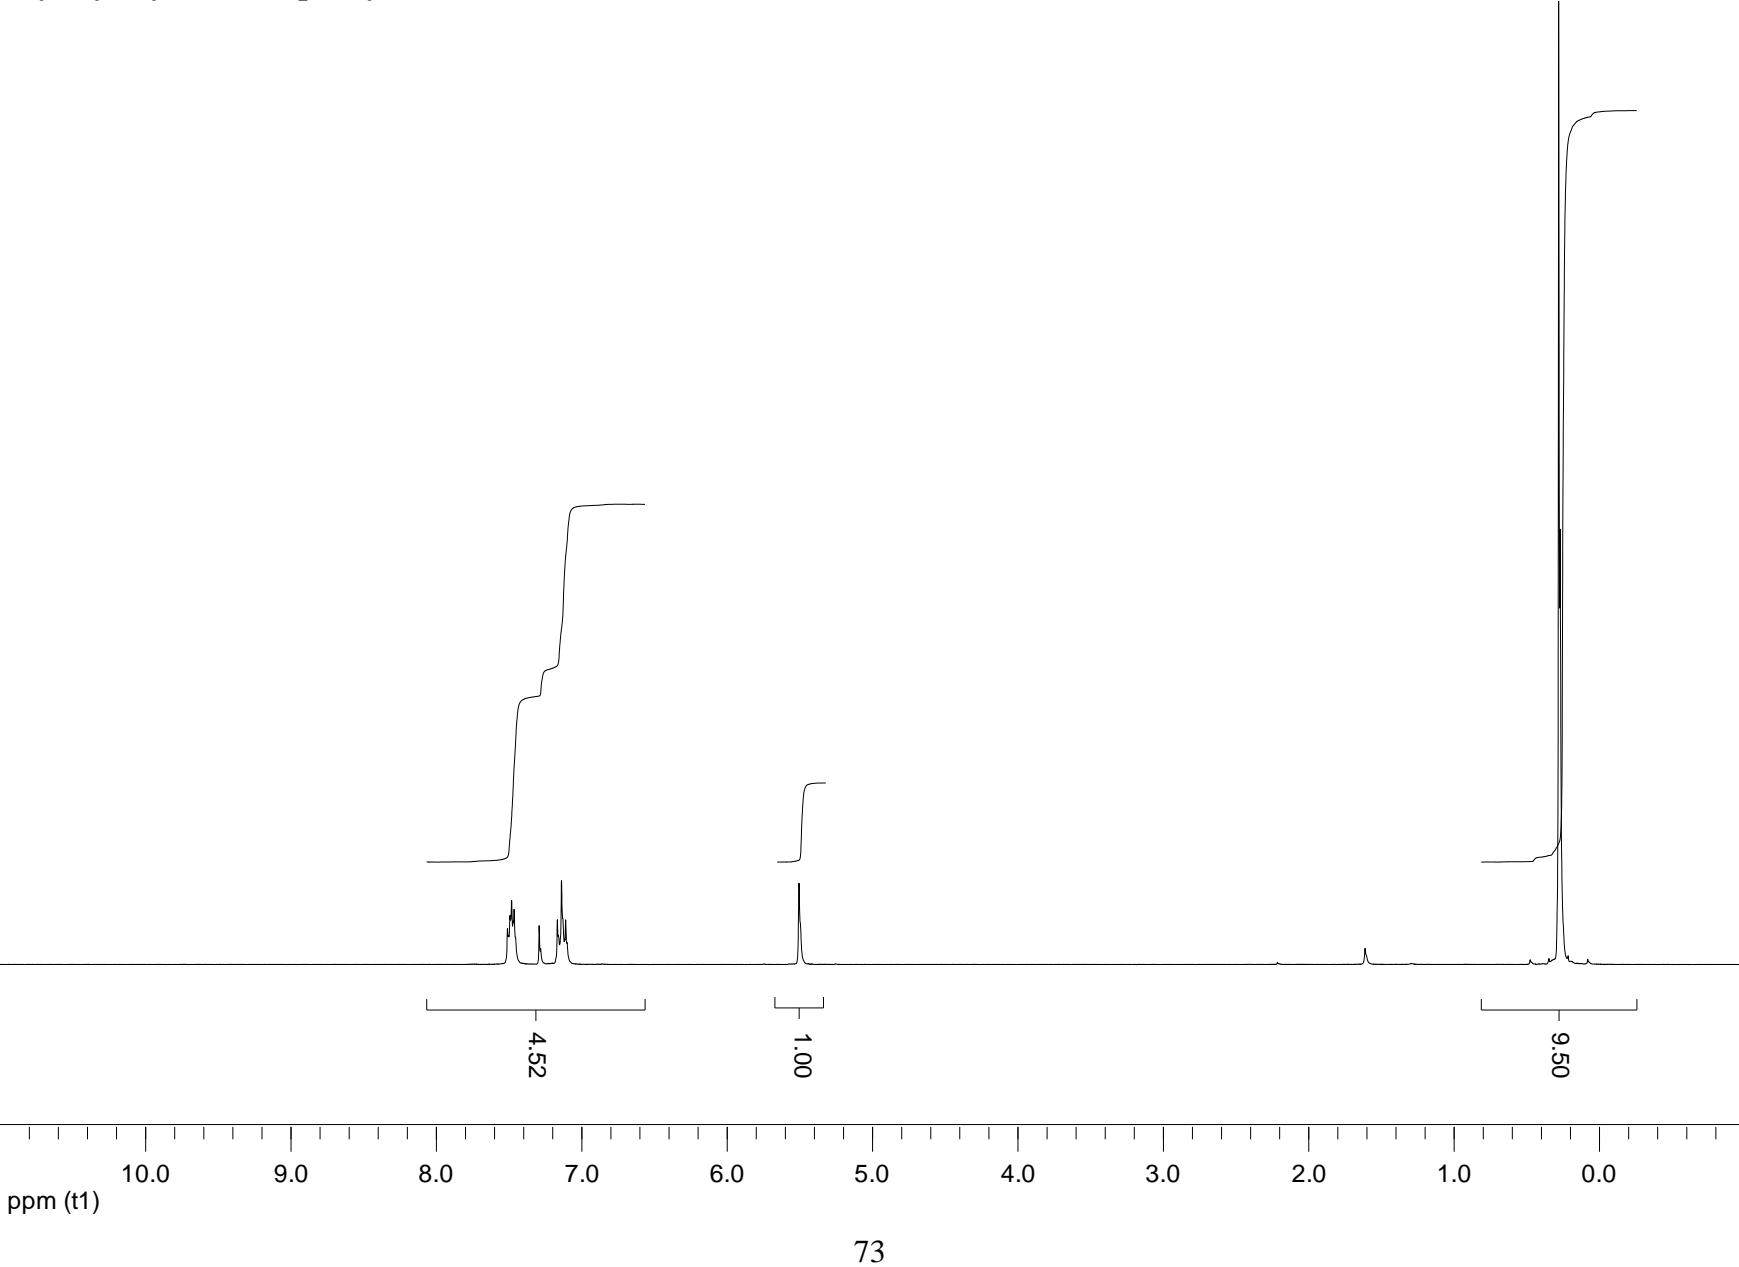

2-Trimethylsilyloxy-(4-thiomethylphenyl)acetonitrile

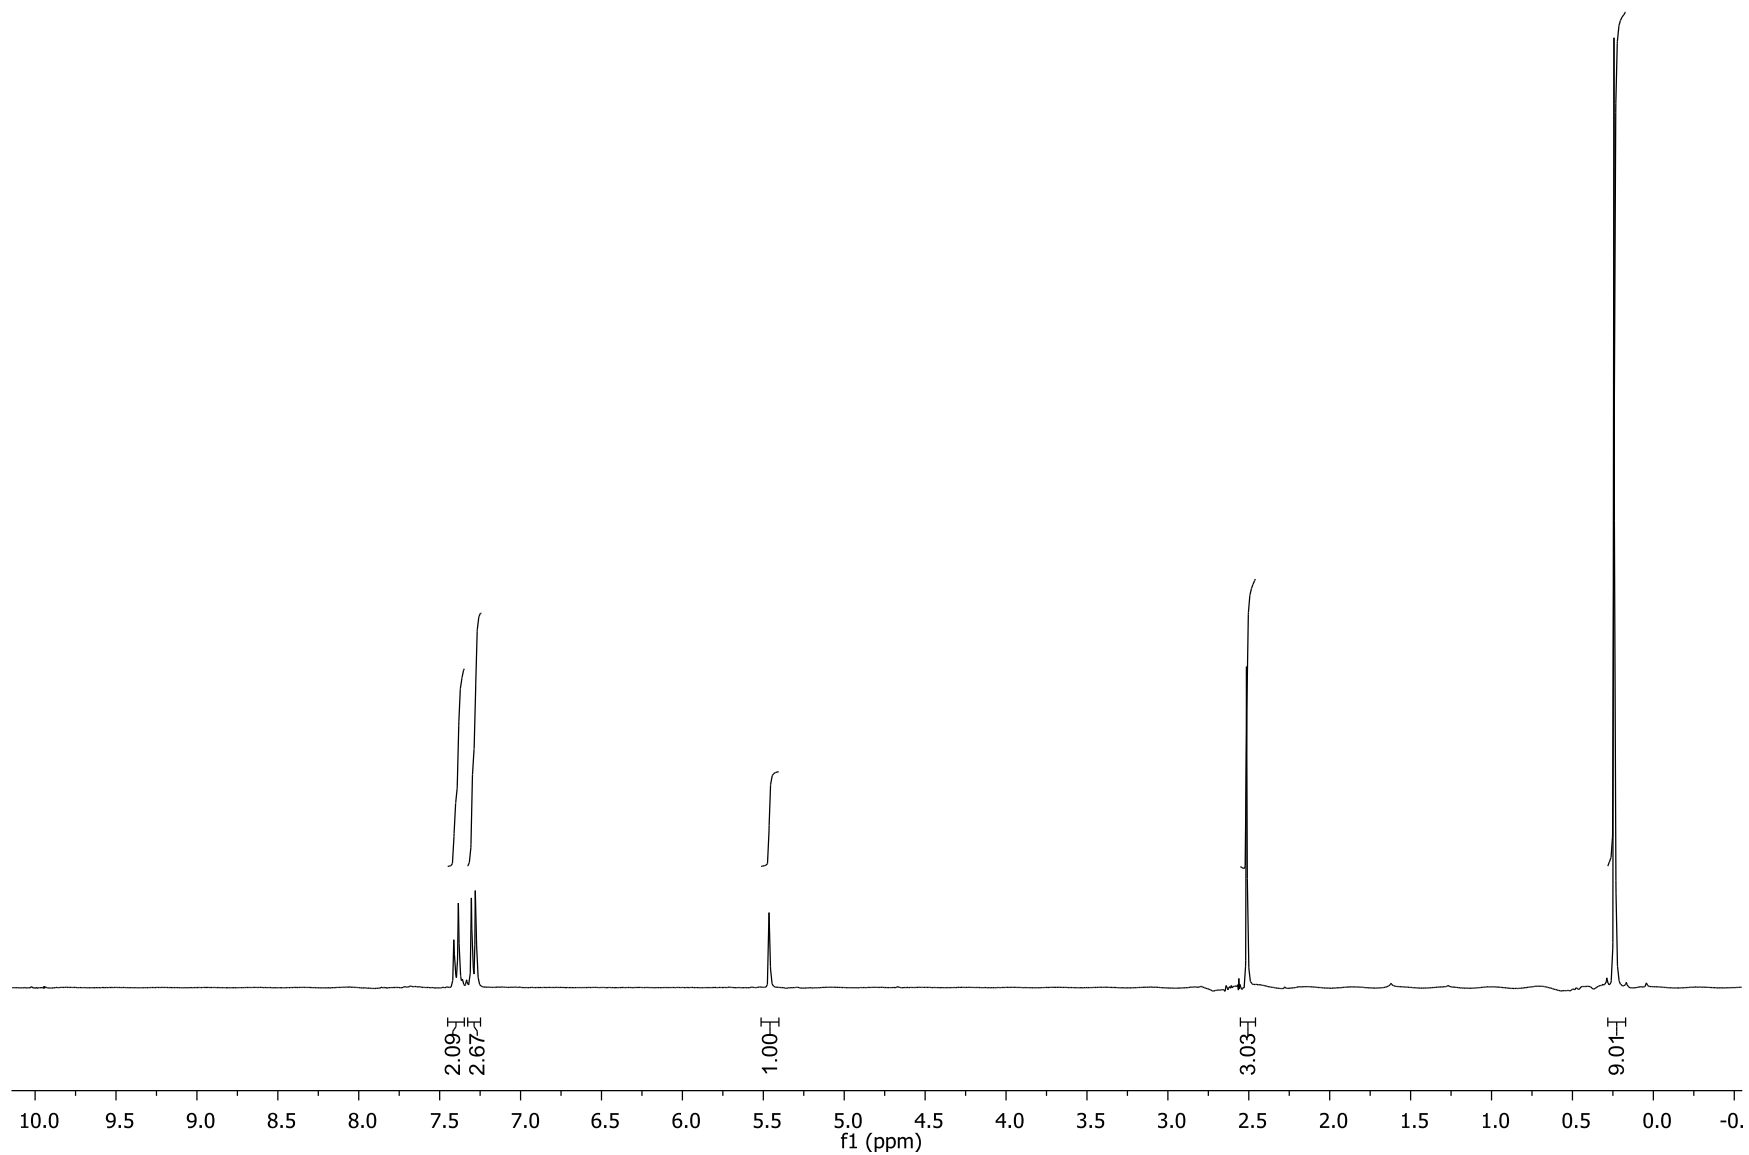

**2-Trimethylsilyloxy-(3-methylphenyl)acetonitrile**

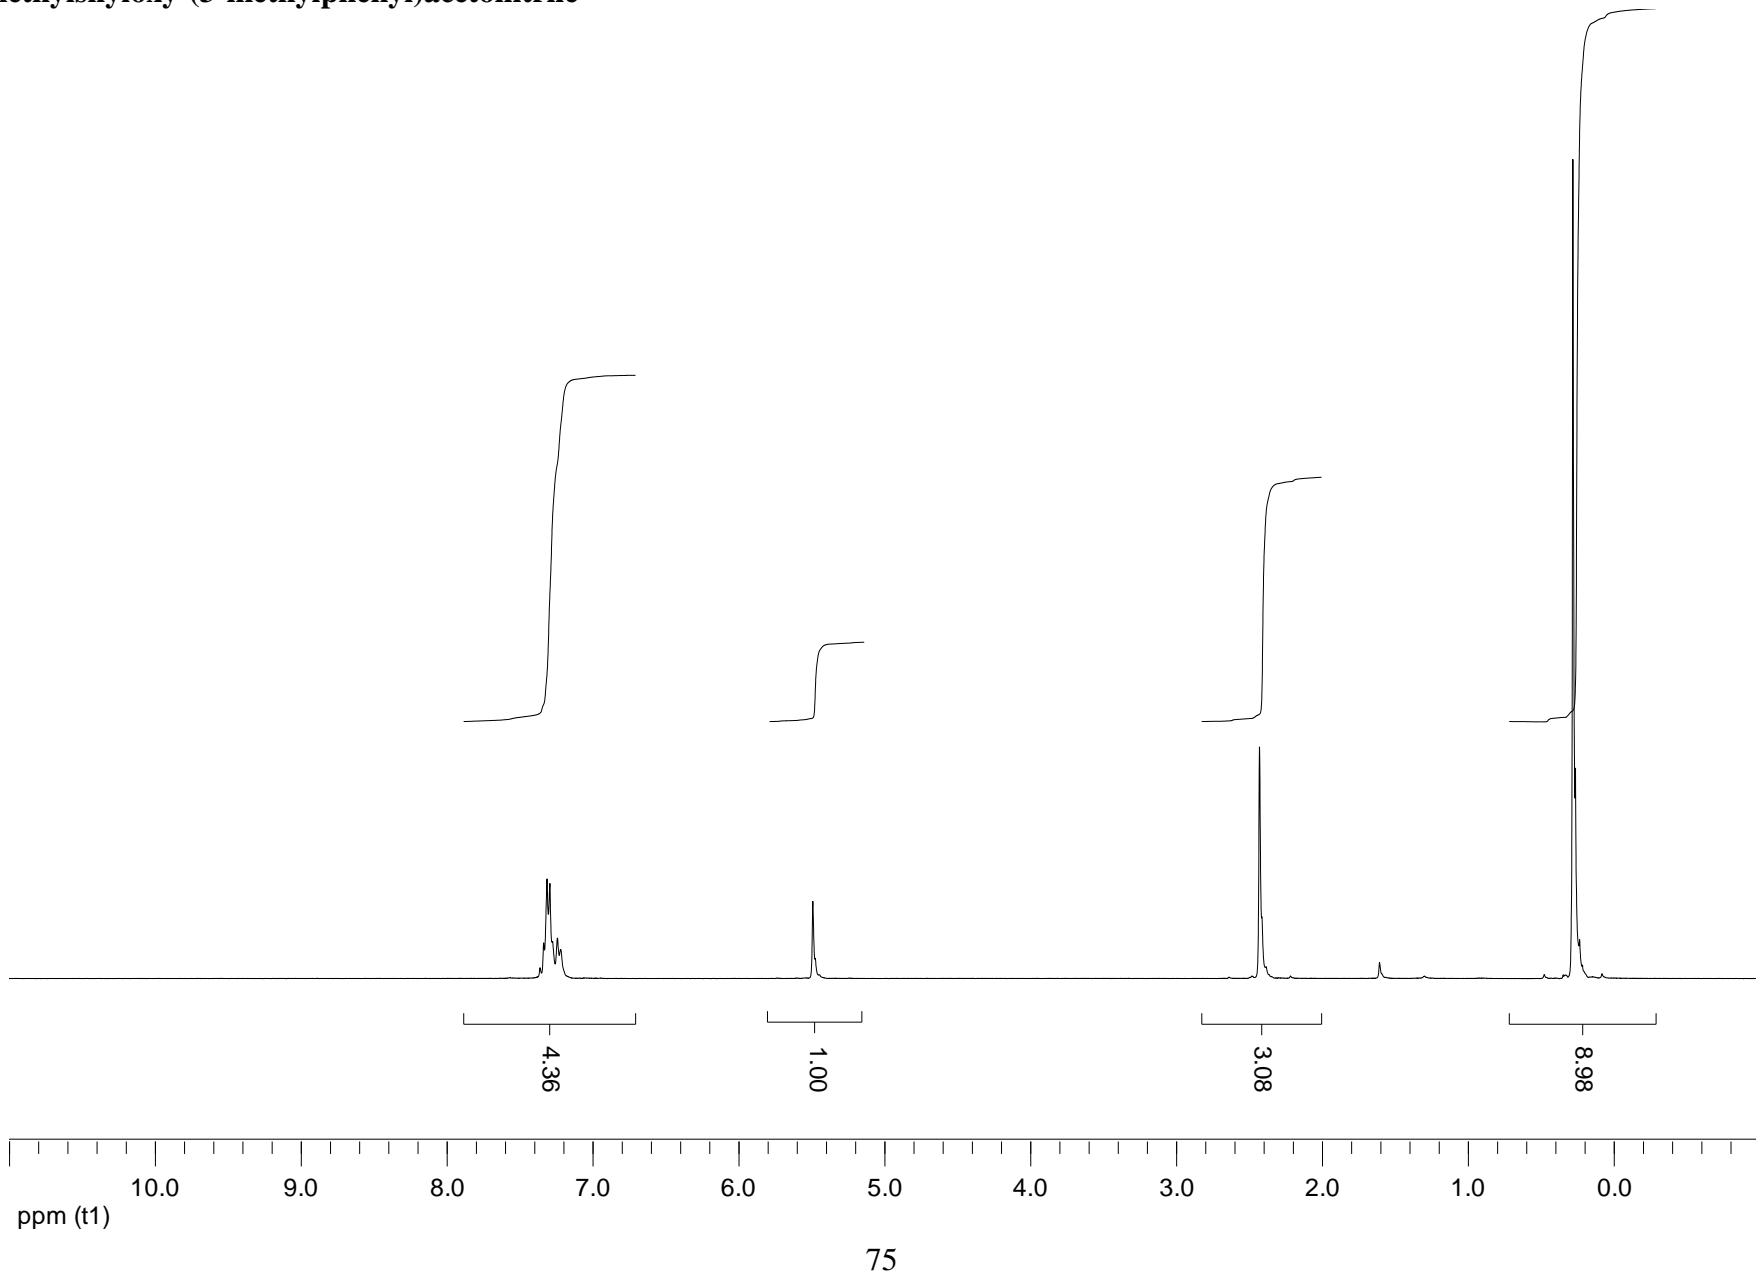

**2-Trimethylsilyloxy-(4-methylphenyl)acetonitrile**

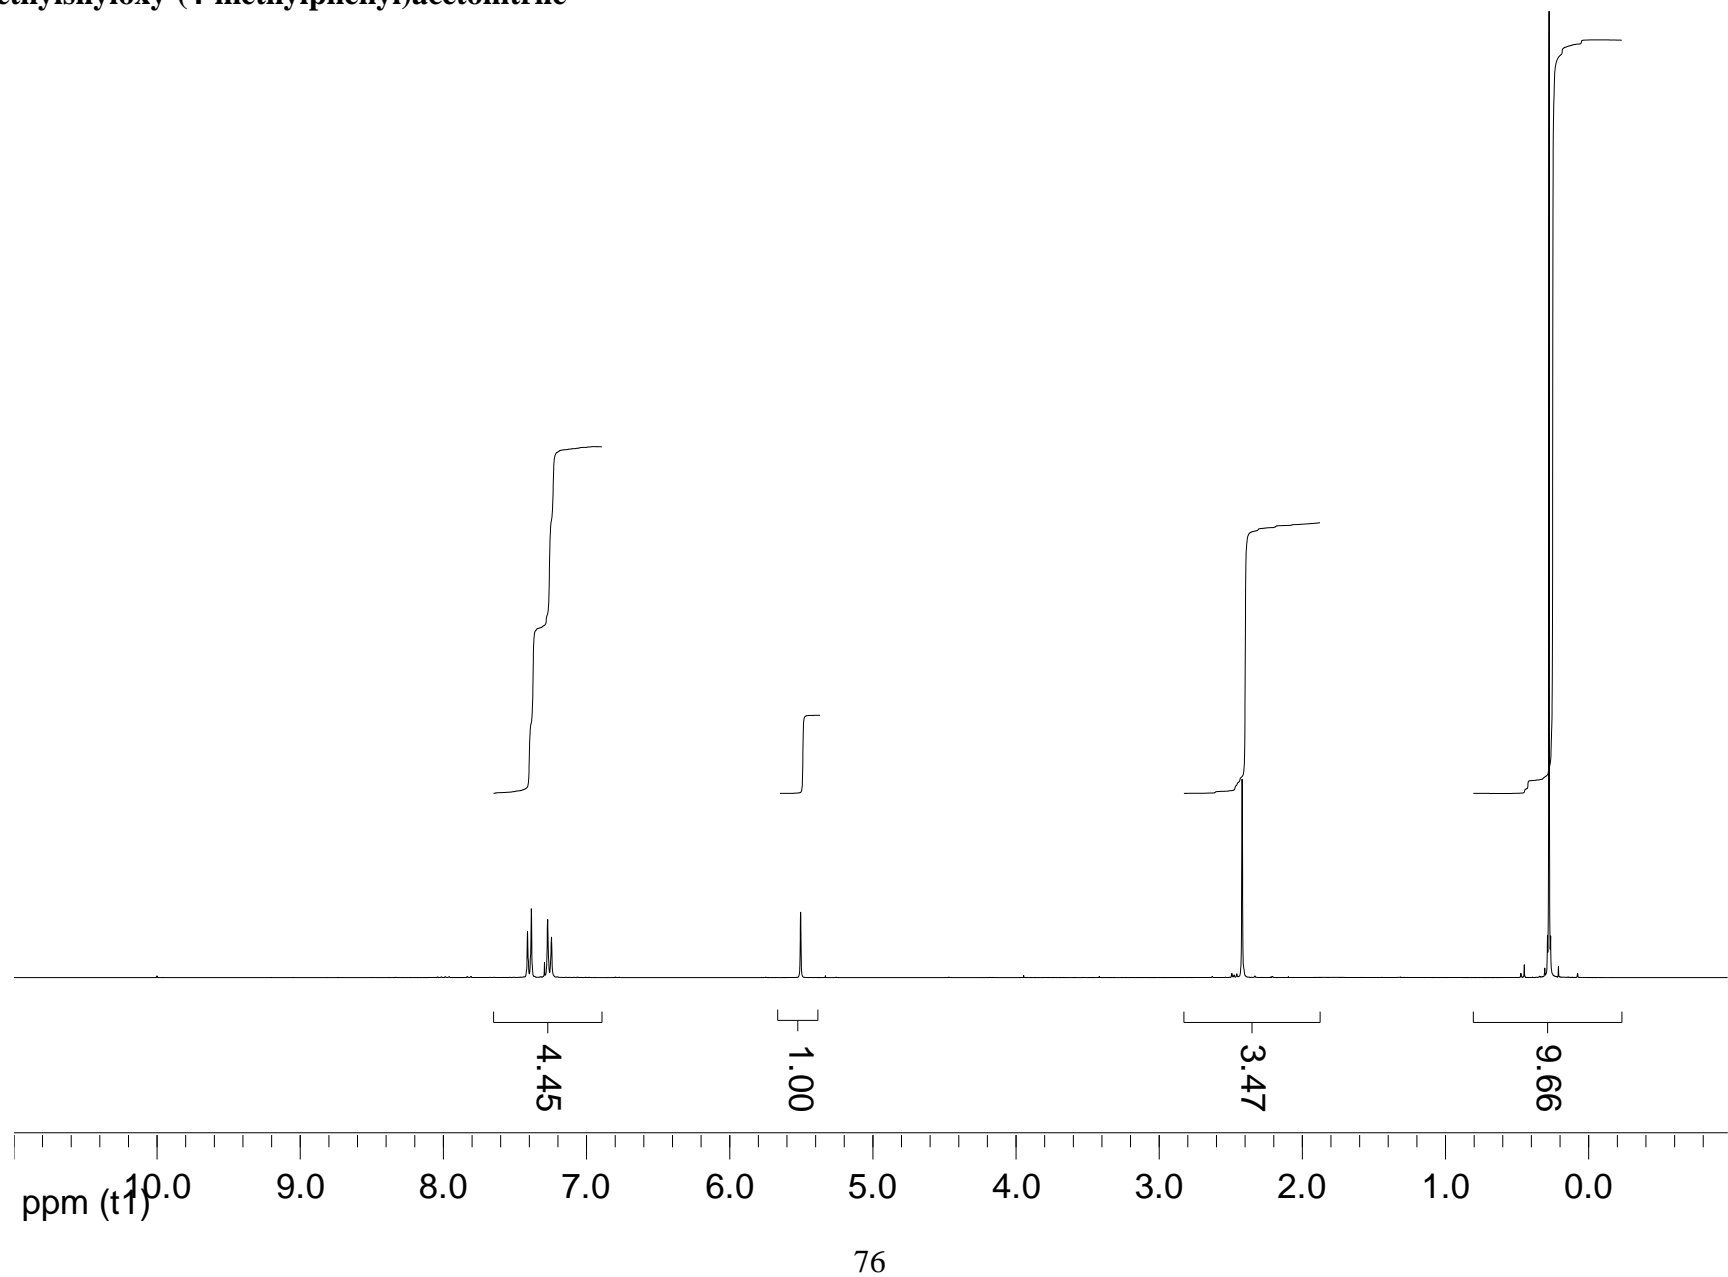

**2-Trimethylsilyloxy-(3,4-dimethylphenyl)acetonitrile**

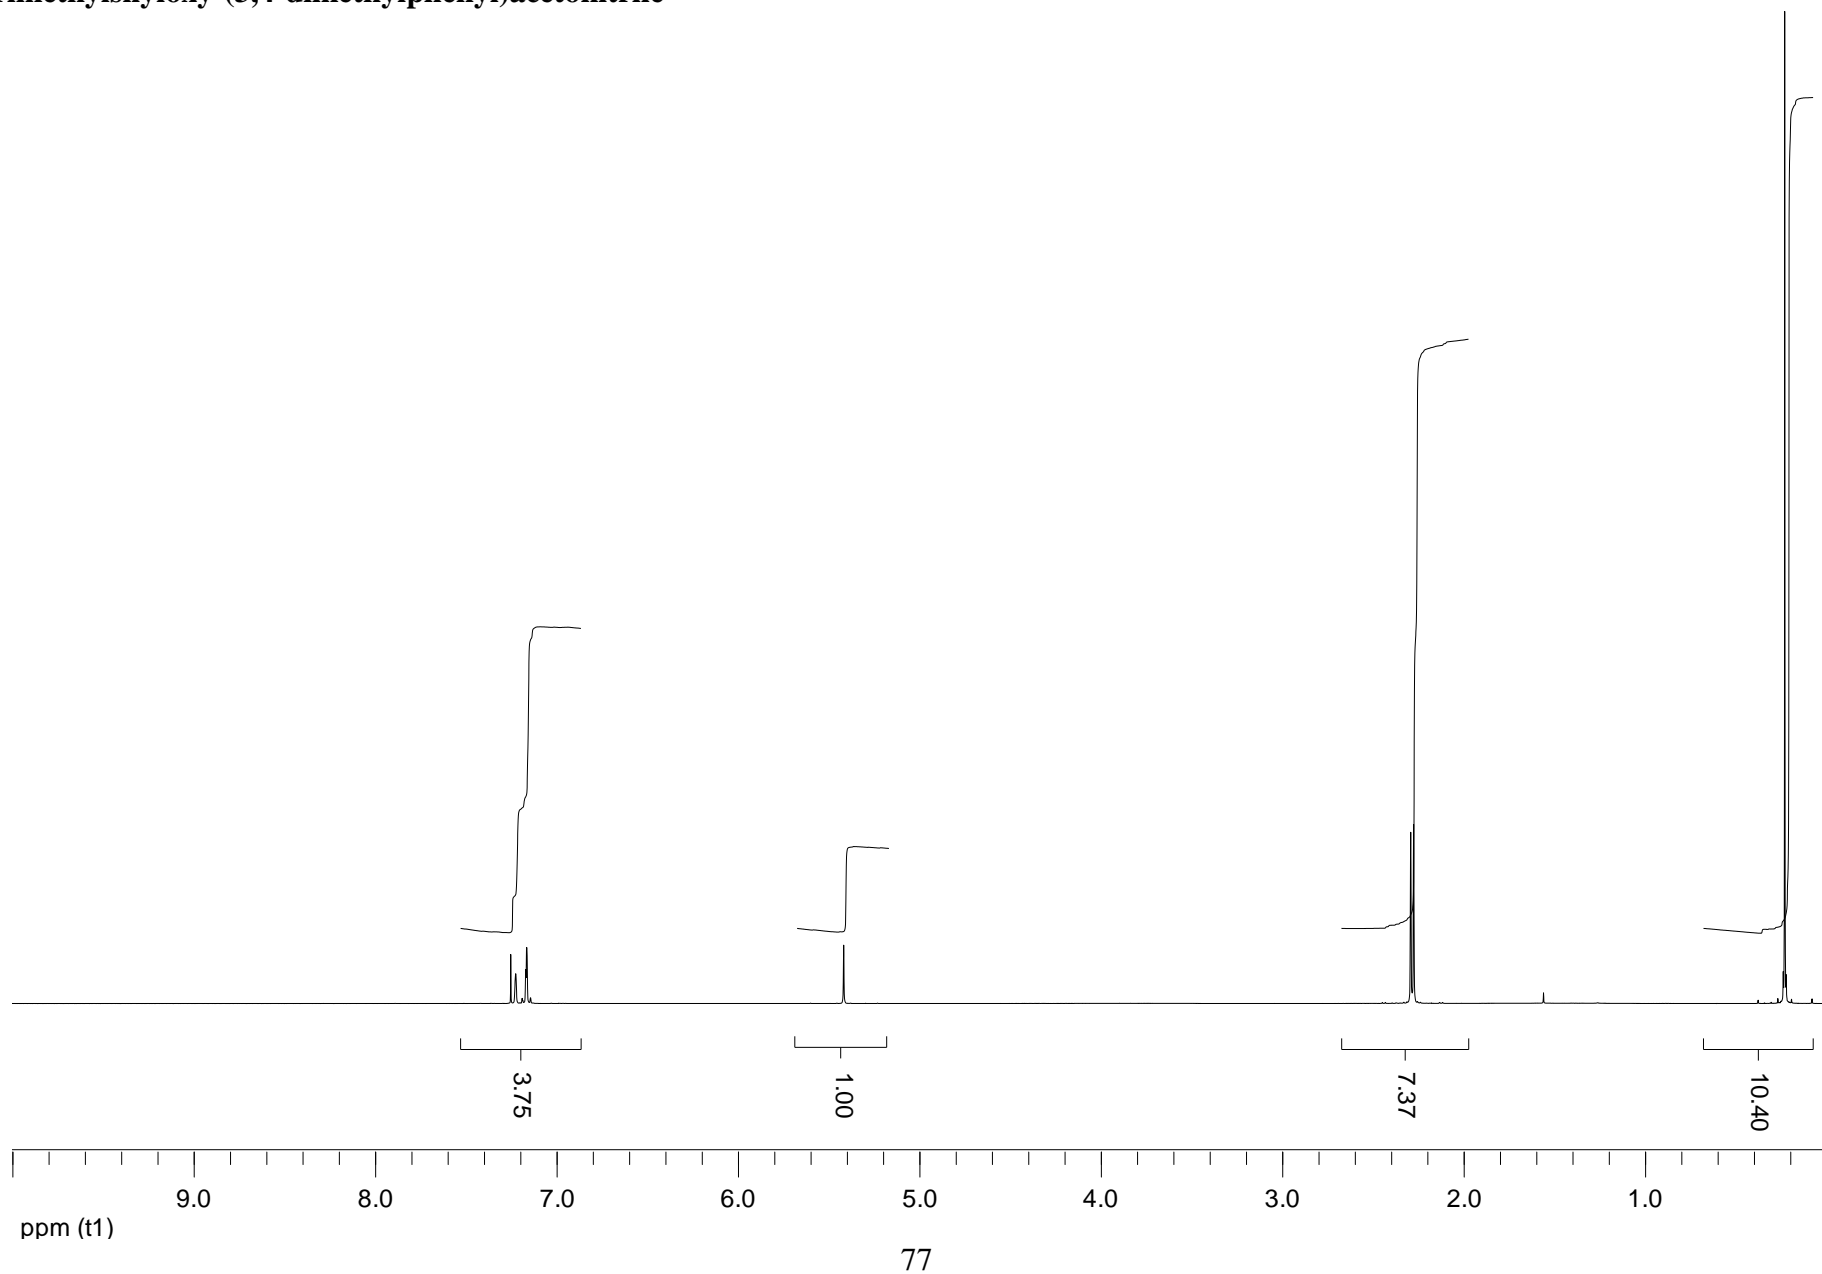

**2-Trimethylsilyloxy-(4-methoxyphenyl)acetonitrile**

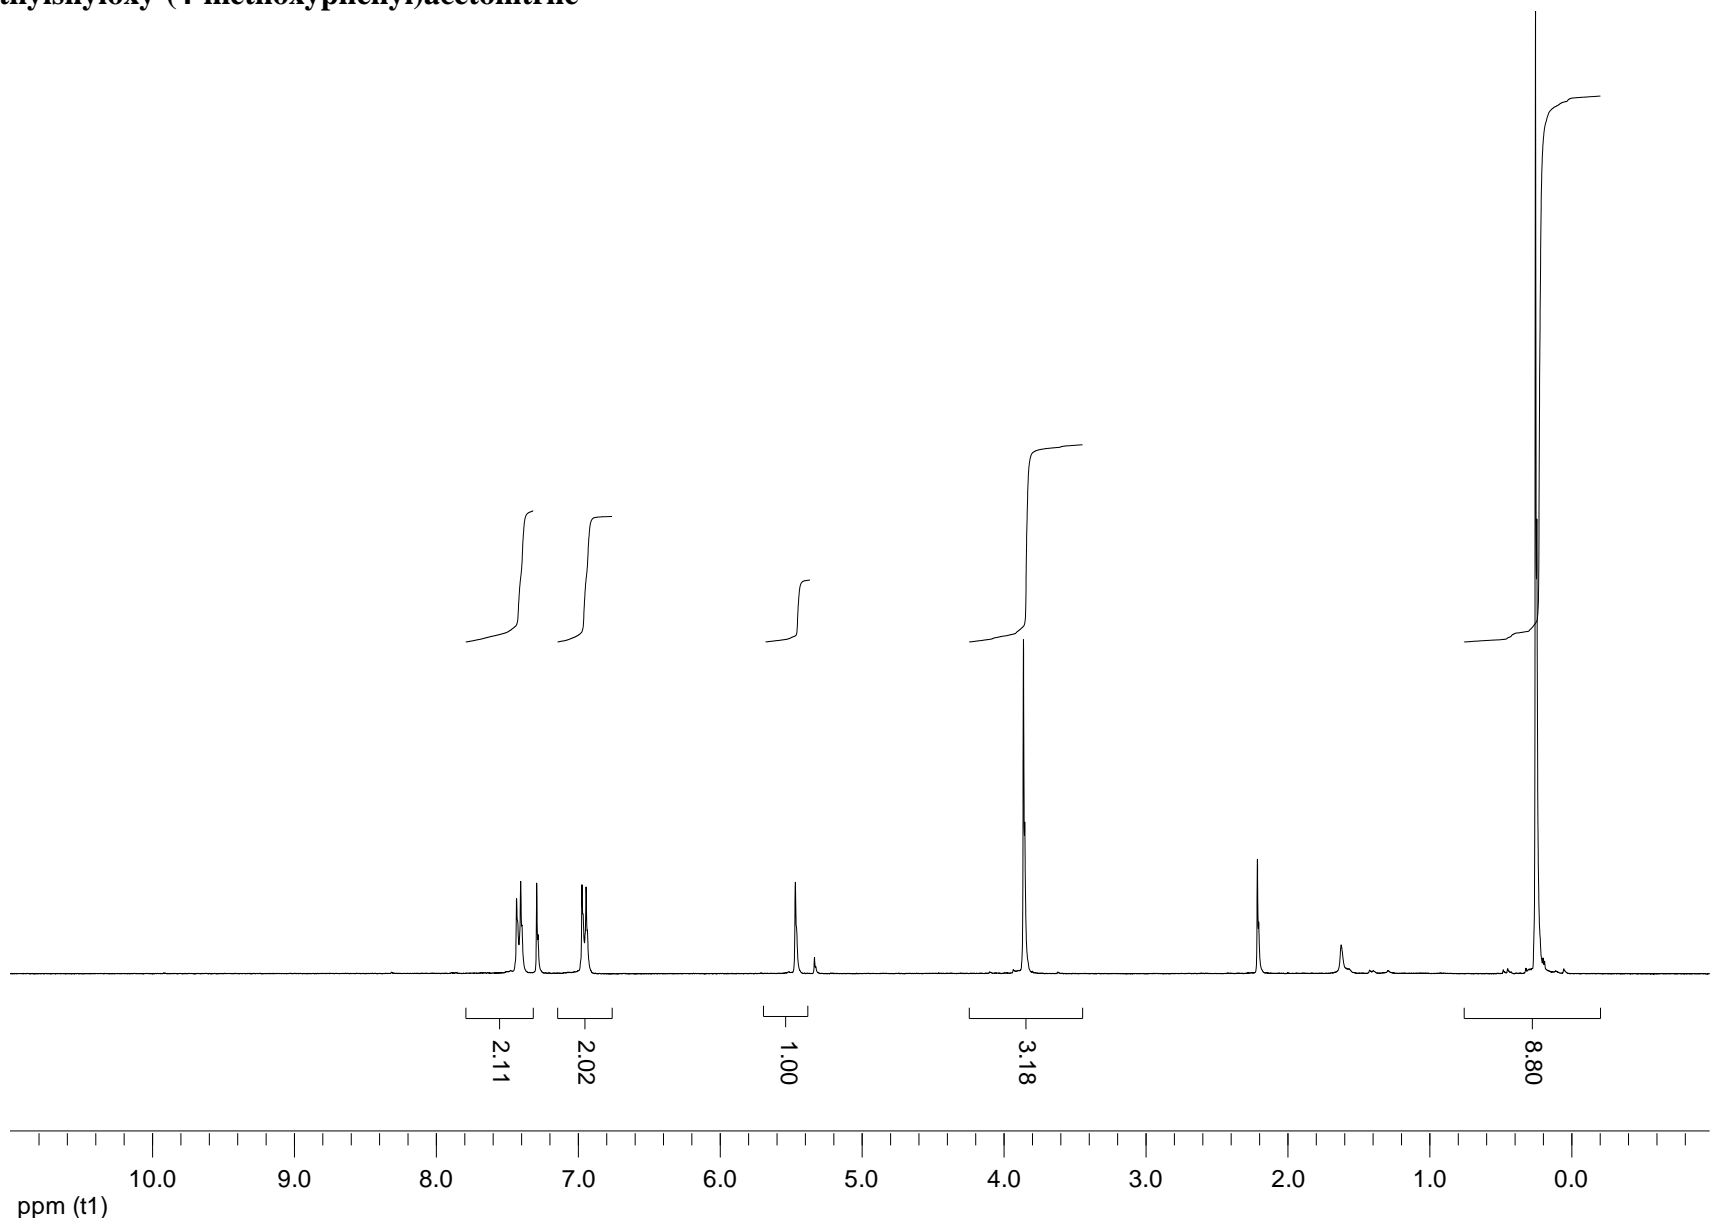

**2-Trimethylsilyloxy-(4-*tert*-butoxyphenyl)acetonitrile**

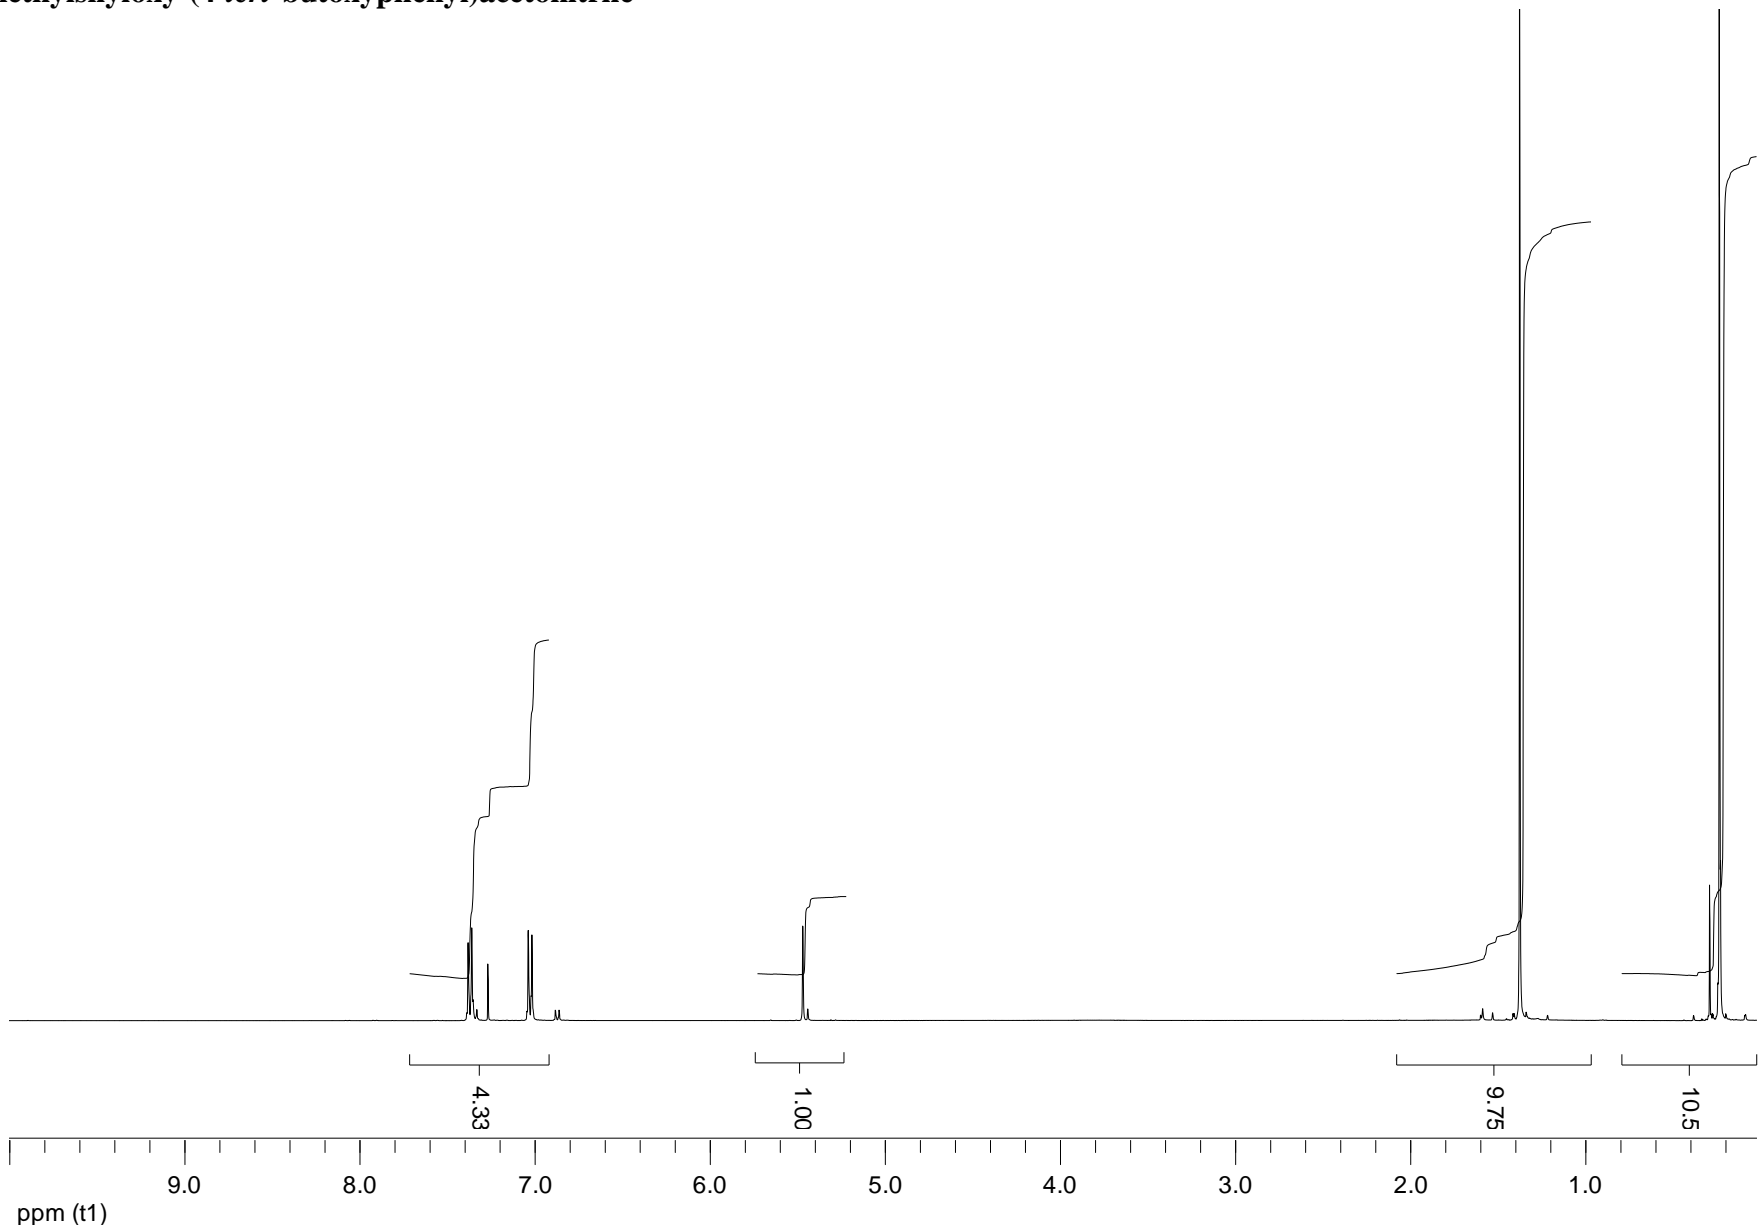

Supplement: c2ob25188d.pdf [file c2ob25188d.pdf]
